# Supplementary material for: Organocatalyst-mediated asymmetric one-pot/two domino/three-component coupling reactions for the synthesis of trans -hydrindanes
Source: Royal Society of Chemistry journal article supplement (doi:10.1039/d4sc00193a), 2024-01-01

Supplementary data

**Organocatalyst-mediated asymmetric one-pot/two domino/three-component coupling reactions for the synthesis of *trans*-hydrindanes**

Naoki Mori, Toshiki Tachibana, Nariyoshi Umekubo, Yujiro Hayashi\*

Department of Chemistry, Graduate School of Science, Tohoku University, Sendai, Miyagi  
980-8578, Japan

**Contents:**

|                                                                                                               |         |
|---------------------------------------------------------------------------------------------------------------|---------|
| 1. General Methods.....                                                                                       | S2      |
| 2. Experimental Procedures.....                                                                               | S3      |
| 2.1. Preparation of Starting Materials.....                                                                   | S3-S6   |
| 2.2. Optimized procedure for the first reaction.....                                                          | S7      |
| 2.3. Optimization for the second reaction and determination of the relative configuration of <b>4ab</b> ..... | S8-S9   |
| 2.4. General procedure for the one-pot reaction.....                                                          | S10-S22 |
| 2.5. Determination of the absolute configuration.....                                                         | S23-S24 |
| 2.6. Unsuccessful substrates for this reaction.....                                                           | S25-S27 |
| 2.7. Attempts to synthesize ketones with other electron withdrawing groups.....                               | S28     |
| 2.8. Attempts to transform <b>4ab</b> and its derivatives.....                                                | S29     |
| 2.9. References.....                                                                                          | S30     |
| 3. Spectra for Compounds.....                                                                                 | S31-S90 |

## 1. General Methods

General Remarks: Unless otherwise shown, all reactions were carried out under nitrogen atmosphere and monitored by thin-layer chromatography using Merck 60 F254 precoated silica gel plates (0.25 mm thickness). Specific optical rotations were measured using a JASCO P-2200 polarimeter. FT-IR spectra were recorded on a JASCO FT/IR-4600 HC1 spectrometer.  $^1\text{H}$  and  $^{13}\text{C}$  NMR spectra were recorded on an Agilent-400 MR (400 MHz for  $^1\text{H}$  NMR, 100 M Hz for  $^{13}\text{C}$  NMR) instrument. Data for  $^1\text{H}$  NMR are reported as chemical shift ( $\delta$  ppm), integration multiplicity (s = singlet, d = doublet, t = triplet, q = quartet, dd = doublet of doublets, td = triplet of doublets, ddd = doublet of doublet of doublets, ddt = double of double of triplets, m = multiplet), coupling constant (Hz), Data for  $^{13}\text{C}$  NMR are reported as chemical shift. High resolution ESI-TOF mass spectra were measured by Thermo Orbi-trap LTQ XL instrument. HPLC analysis was performed on a HITACHI Elite LaChrom Series HPLC, UV detection monitored at appropriate wavelength respectively, using CHIRALPACK<sup>®</sup> AD-H (0.46 cm  $\times$  25 cm), CHIRALPACK<sup>®</sup> IB (0.46 cm  $\times$  25 cm), CHIRALPACK<sup>®</sup> ID (0.46 cm  $\times$  25 cm). Melting-point apparatus was Yanaco MP-J3.

## 2. Experimental Procedures

### 2.1. Preparation of Starting Materials and Catalysts

#### Ethyl 4-ethoxycarbonyl-2-oxopentenoate (**1**)

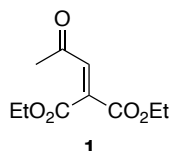

<sup>1</sup>H NMR spectrum of synthesized compound **1** matched with that of the reported one.<sup>[1]</sup>

<sup>1</sup>H NMR (400 MHz, CDCl<sub>3</sub>): δ 9.75 (d, *J* = 7.6 Hz, 1H), 7.69 (brs, 4H), 7.51 (d, *J* = 16.4 Hz, 1H), 6.78 (dd, *J* = 16.0, 7.6 Hz, 1H)

#### (*E*)-4-Cinnamaldehyde (**2a**)

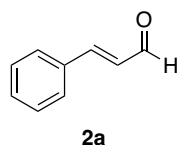

Compound **2a** was purchased from TCI (product code: C0352).

#### (*E*)-4-Methoxycinnamaldehyde (**2b**)

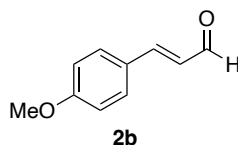

Compound **2b** was purchased from TCI (product code: M1012).

#### (*E*)-4-Fluorocinnamaldehyde (**2c**)

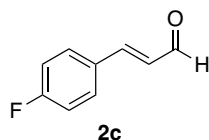

<sup>1</sup>H NMR spectrum of synthesized compound **2c** matched with that of the reported one.<sup>[2]</sup>

<sup>1</sup>H NMR (400 MHz, CDCl<sub>3</sub>): δ 9.68 (d, *J* = 8.0 Hz, 1H), 7.56 (dd, *J* = 8.8, 5.6 Hz, 2H), 7.44 (d, *J* = 16.0 Hz, 1H), 7.12 (t, *J* = 8.4 Hz, 2H), 6.64 (dd, *J* = 16.0, 8.0 Hz, 1H)

#### (*E*)-4-Chlorocinnamaldehyde (**2d**)

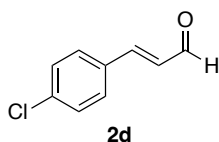

<sup>1</sup>H NMR spectrum of synthesized compound **2d** matched with that of the reported one.<sup>[3]</sup>

**<sup>1</sup>H NMR (400 MHz, CDCl<sub>3</sub>):** δ 9.70 (d, *J* = 7.6 Hz, 1H), 7.50 (d, *J* = 8.4 Hz, 1H), 7.45-7.40 (m, 3H), 6.69 (dd, *J* = 16.0, 7.6 Hz, 1H)

**(E)-4-Trifluoromethylcinnamaldehyde (2e)**

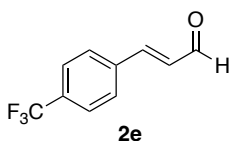

<sup>1</sup>H NMR spectrum of synthesized compound **2e** matched with that of the reported one.<sup>[4]</sup>

**<sup>1</sup>H NMR (400 MHz, CDCl<sub>3</sub>):** δ 9.75 (d, *J* = 7.6 Hz, 1H), 7.69 (brs, 4H), 7.51 (d, *J* = 16.4 Hz, 1H), 6.78 (dd, *J* = 16.0, 7.6 Hz, 1H)

**(E)-4-Bromocinnamaldehyde (2f)**

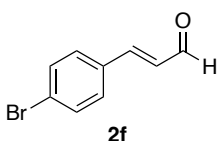

<sup>1</sup>H NMR spectrum of synthesized compound **2f** matched with that of the reported one.<sup>[3]</sup>

**<sup>1</sup>H NMR (400 MHz, CDCl<sub>3</sub>):** δ 9.71 (d, *J* = 7.6 Hz, 1H), 7.57 (d, *J* = 8.4 Hz, 1H), 7.44-7.39 (m, 3H), 6.70 (dd, *J* = 16.0, 7.6 Hz, 1H)

**(E)-3-Bromocinnamaldehyde (2g)**

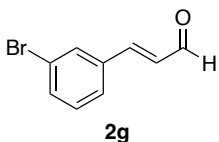

<sup>1</sup>H NMR spectrum of synthesized compound **2g** matched with that of the reported one.<sup>[5]</sup>

**<sup>1</sup>H NMR (400 MHz, CDCl<sub>3</sub>):** δ 9.71 (d, *J* = 7.6 Hz, 1H), 7.70 (s, 1H), 7.57 (d, *J* = 8.0 Hz, 1H), 7.49 (d, *J* = 7.6 Hz, 1H), 7.40 (d, *J* = 16.4 Hz, 1H), 7.31 (t, *J* = 8.0 Hz, 1H), 6.64 (dd, *J* = 16.0, 8.0 Hz, 1H)

**(E)-2-Bromocinnamaldehyde (2h)**

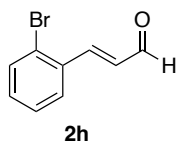

$^1\text{H}$  NMR spectrum of synthesized compound **2h** matched with that of the reported one.<sup>[5]</sup>

$^1\text{H}$  NMR (400 MHz,  $\text{CDCl}_3$ ):  $\delta$  9.78 (d,  $J = 7.6$  Hz, 1H), 7.90 (d,  $J = 16.0$  Hz, 1H), 7.66 (dt,  $J = 8.0, 1.6$  Hz, 1H), 7.38 (t,  $J = 8.0$  Hz, 1H), 7.28 (td,  $J = 8.0, 1.6$  Hz, 1H), 6.67 (dd,  $J = 16.0, 7.6$  Hz, 1H)

**(E)-4-Nitrocinnamaldehyde (2i)**

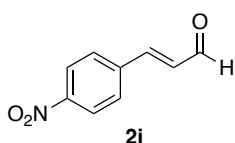

$^1\text{H}$  NMR spectrum of synthesized compound **2i** matched with that of the reported one.<sup>[6]</sup>

$^1\text{H}$  NMR (400 MHz,  $\text{CDCl}_3$ ):  $\delta$  9.78 (d,  $J = 7.2$  Hz, 1H), 8.29 (d,  $J = 8.8$  Hz, 2H), 7.73 (d,  $J = 8.8$  Hz, 2H), 7.53 (d,  $J = 16.0$  Hz, 1H), 6.81 (dd,  $J = 16.0, 7.6$  Hz, 1H)

**(E)-3-(2-Furyl)acrolein (2j)**

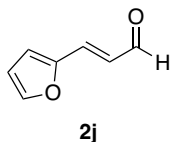

Compound **2j** was purchased from Sigma-Aldrich (product code: F20602).

**(2E,4E)-5-(4-methoxyphenyl)penta-2,4-dienal (2k)**

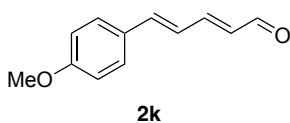

$^1\text{H}$  NMR spectrum of synthesized compound **2k** matched with that of the reported one.<sup>[7]</sup>

$^1\text{H}$  NMR (400 MHz,  $\text{CDCl}_3$ ):  $\delta$  9.59 (d,  $J = 8.0$  Hz, 1H), 7.48-7.43 (m, 2H), 7.25 (dd,  $J = 15.2, 10.8$  Hz, 1H), 7.00-6.85 (m, 4H), 6.22 (dd,  $J = 15.2, 8.0$  Hz, 1H), 3.84 (s, 3H)

**(S)-2-(Diphenyl((trimethylsilyloxy)methyl)pyrrolidine (catalyst I)**

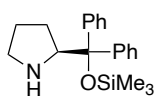

**catalyst I**

$^1\text{H}$  NMR spectrum of synthesized catalyst **I** matched with that of the reported one.<sup>[8]</sup>

$^1\text{H}$  NMR (400 MHz,  $\text{CDCl}_3$ ):  $\delta$  7.47-7.45 (m, 2H), 7.39-7.34 (m, 2H), 7.29-7.18 (m, 6H), 4.03 (t,  $J = 7.6$  1H), 2.88-2.76 (m, 2H), 1.62-1.51 (m, 3H), 1.41-1.33 (m, 1H), 0.09 (s, 9H)

**(S)-2-(((methyldiphenylsilyloxy)diphenylmethyl)pyrrolidine (catalyst II)**

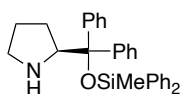

**catalyst II**

$^1\text{H}$  NMR spectrum of synthesized catalyst **II** matched with that of the reported one.<sup>[9]</sup>

$^1\text{H}$  NMR (400 MHz,  $\text{CDCl}_3$ ):  $\delta$  7.53-7.48 (m, 6H), 7.37-7.18 (m, 14H), 3.99 (t,  $J = 7.2$  1H), 2.75-2.69 (m, 1H), 2.57-2.52 (m, 1H), 1.62-1.55 (m, 2H), 1.41-1.32 (m, 2H), 1.03-0.94 (m, 1H), 0.19 (s, 3H)

## 2.2. Optimized procedure for the first reaction

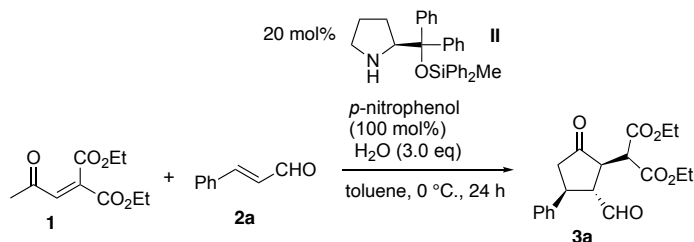

To a stirred solution of **1** (500 mg, 2.33 mmol) and **2a** (308 mg, 2.33 mmol) in toluene (4.7 mL) were added water (126  $\mu$ L, 7.00 mmol), catalyst **II** (210 mg, 0.467 mmol), *p*-nitrophenol (325 mg, 2.33 mmol) at 0 °C. After stirring for 24 h at 0 °C, sat. K<sub>2</sub>CO<sub>3</sub> solution was added and the mixture was extracted with EtOAc. The organic layer was washed with sat. K<sub>2</sub>CO<sub>3</sub> solution and brine, dried over anhydrous magnesium sulfate, and concentrated under reduced pressure. The residue was purified by silica gel column chromatography (hexane/EtOAc = 8:1) to give **3a** (606 mg, 75%).

### Diethyl 2-((1*R*,2*R*,3*S*)-2-formyl-5-oxo-3-phenylcyclopentyl)malonate (**3a**)

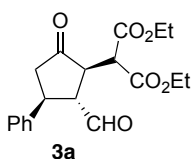

**Physical state:** a yellow oil

**Optical rotation:**  $[\alpha]_{\text{D}}^{27} = +111$  (*c* 1.04, CHCl<sub>3</sub>)

**IR (neat):**  $\nu_{\text{max}}$  2983, 1732, 1456, 1371, 1230, 1156, 1028, 864, 765, 702 cm<sup>-1</sup>

**<sup>1</sup>H NMR (400 MHz, CDCl<sub>3</sub>):**  $\delta$  9.64 (d, *J* = 1.6 Hz, 1H), 7.42-7.27 (m, 5H), 4.27-4.17 (m, 2H), 4.15 (q, *J* = 7.2 Hz, 2H), 4.08 (d, *J* = 4.0 Hz, 1H), 3.85 (td, *J* = 11.2, 1.6 Hz, 1H), 3.35 (td, *J* = 11.2, 8.8 Hz, 1H), 3.20 (ddd, *J* = 11.2, 4.0, 1.2 Hz, 1H), 2.92-2.76 (m, 2H), 1.28 (t, *J* = 7.2 Hz, 3H), 1.27 (t, *J* = 7.2 Hz, 3H)

**<sup>13</sup>C NMR (100 MHz, CDCl<sub>3</sub>):**  $\delta$  212.6, 201.0, 168.2, 167.9, 140.1, 129.1, 127.7, 127.3, 62.0, 62.0, 57.7, 50.8, 49.2, 45.9, 43.5, 13.9, 13.8

**HRMS (ESI):** calcd. for C<sub>19</sub>H<sub>22</sub>NaO<sub>6</sub> [M+Na]<sup>+</sup> 369.1309, found 369.1311

**Chiral HPLC:** (ID, hexane/*i*-PrOH = 95:5, flow rate = 1.0 mL/min,  $\lambda$  = 210 nm)  $t_{\text{minor}}$  = 28.1 min,  $t_{\text{major}}$  = 32.0 min (>99% ee)

### 2.3. Optimization for the second reaction and determination of the relative configuration of **4ab**

**Table S1.** The effect of solvent in the reaction of **3a** and **2b**.<sup>[a]</sup>

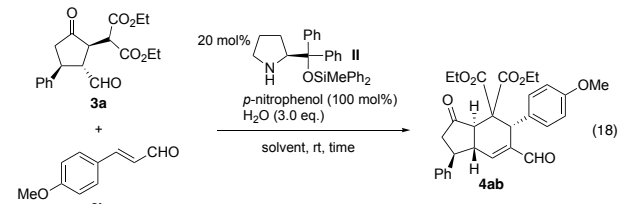

| entry | solvent           | time [h] | yield [%]         |
|-------|-------------------|----------|-------------------|
| 1     | toluene           | 24       | 39 <sup>[b]</sup> |
| 2     | MeOH              | 60       | 26 <sup>[c]</sup> |
| 3     | EtOH              | 60       | 42 <sup>[d]</sup> |
| 4     | <sup>i</sup> PrOH | 12       | 55                |
| 5     | <sup>t</sup> BuOH | 6        | 72 <sup>[e]</sup> |

[a] Unless otherwise shown, the reaction was performed by employing **3a** (0.24 mmol), **2b** (0.24 mmol), organocatalyst (0.048 mmol), *p*-nitrophenol (0.24 mmol), water (0.73 mmol), in solvent (0.5 mL) at room temperature. [b] **3a** was recovered in 25% yield. [c] **3a** was recovered in 49% yield. [d] **3a** was recovered in 15% yield. [e] Enantiomeric excess (ee) was determined to be >99% by HPLC analysis on a chiral column material.

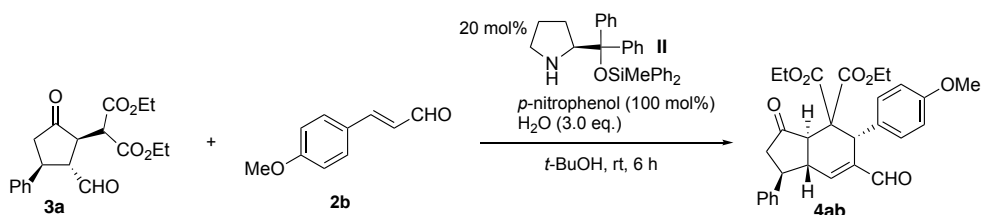

To a stirred solution of **3a** (83.7 mg, 0.242 mmol) and **2b** (39.2 mg, 0.242 mmol) in *t*-BuOH (0.48 mL) were added water (13.0  $\mu$ L, 0.725 mmol), catalyst **II** (21.7 mg, 48.3  $\mu$ mol), *p*-nitrophenol (33.6 mg, 0.242 mmol) at room temperature. After stirring for 6 h, sat.  $K_2CO_3$  solution was added and the mixture was extracted with EtOAc. The organic layer was washed with sat.  $K_2CO_3$  solution and brine, dried over anhydrous magnesium sulfate, and concentrated under reduced pressure. The residue was purified by silica gel



column chromatography (hexane/EtOAc = 5:1 to 4:1) to give **4ab** (85.2 mg, 72%).

Diethyl (1*S*,3*aR*,5*R*,7*aR*)-6-formyl-5-(4-methoxyphenyl)-3-oxo-1-phenyl-1,2,3,3*a*,5,7*a*-hexahydro-4*H*-indene-4,4-dicarboxylate (**4ab**)

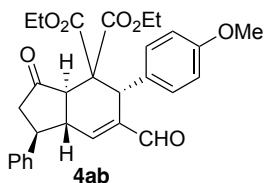

**Physical state:** a yellow oil

**Optical rotation:**  $[\alpha]_{\text{D}}^{27} = -183$  ( $c$  1.10, CHCl<sub>3</sub>)

**IR (neat):**  $\nu_{\text{max}}$  2979, 1742, 1691, 1609, 1511, 1367, 1252, 1179, 1034, 754, 702 cm<sup>-1</sup>

**<sup>1</sup>H NMR (400 MHz, CDCl<sub>3</sub>):**  $\delta$  9.30 (s, 1H), 7.54-6.78 (m, 10H), 4.91 (s, 1H), 4.38-4.17 (m, 2H), 3.92 (m, 1H), 3.77 (s, 3H), 3.75 (m, 1H), 3.33 (td,  $J = 10.8, 8.0$  Hz, 1H), 3.04 (d,  $J = 14.0$  Hz, 1H), 3.00 (dd,  $J = 19.2, 8.0$  Hz, 1H), 2.82 (ddt,  $J = 14.0, 10.8, 2.0$  Hz, 1H), 2.53 (dd,  $J = 19.2, 10.8$  Hz, 1H), 1.29 (t,  $J = 7.2$  Hz, 3H), 0.97 (t,  $J = 7.2$  Hz, 3H)

**<sup>13</sup>C NMR (100 MHz, CDCl<sub>3</sub>):**  $\delta$  205.7, 191.5, 168.5, 167.1, 159.2, 145.6, 143.0, 139.3, 129.9, 129.2, 127.8, 127.4, 127.3, 113.9, 62.1, 61.5, 59.8, 55.2, 51.4, 47.1, 45.5, 45.0, 44.3, 14.1, 13.5

**HRMS (ESI):** calcd. for C<sub>29</sub>H<sub>30</sub>NaO<sub>7</sub> [M+Na]<sup>+</sup> 513.1884, found 513.1881

**Chiral HPLC:** (AD-H, hexane/*i*-PrOH = 90:10, flow rate = 1.0 mL/min,  $\lambda = 208$  nm)  $t_{\text{minor}} = 25.0$  min,  $t_{\text{major}} = 29.7$  min (>99% ee)

The relative configuration of **4ab** was determined by NOESY experiments.

<NOESY experiment of **4ab**>

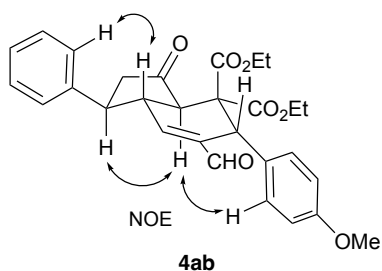

## 2.4. General procedure for the one-pot reaction

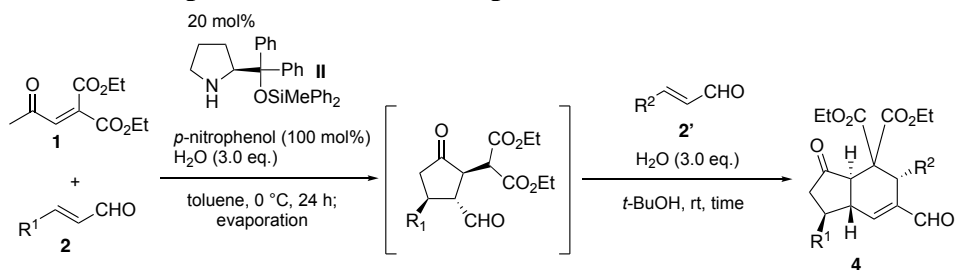

To a stirred solution of **1** (100 mg, 0.469 mmol) and **2** (0.469 mmol, 1.0 equiv.) in toluene (0.93 mL, 0.5 M for **1**) were added water (25.0  $\mu$ L, 1.41 mmol, 3.0 equiv.), catalyst **II** (42.0 mg, 93.4  $\mu$ mol, 0.2 equiv.), *p*-nitrophenol (64.9 mg, 0.469 mmol, 1.0 equiv.) at 0 °C. After stirring for 24 h at 0 °C, the mixture was evaporated under reduced pressure. The crude mixture was dissolved in *t*-BuOH (0.93 mL, 0.5 M for **1**), and water (25.0  $\mu$ L, 1.41 mmol, 3.0 equiv.) and **2'** (0.469 mmol, 1.0 equiv.) were added to the mixture. After stirring for the indicated time, sat.  $K_2CO_3$  solution was added and the mixture was extracted with EtOAc. The organic layer was washed with sat.  $K_2CO_3$  solution and brine, dried over anhydrous magnesium sulfate, and concentrated under reduced pressure. The residue was purified by silica gel column chromatography to give **4**.

### Diethyl (1*S*,3*aR*,5*R*,7*aR*)-6-formyl-1-(4-methoxyphenyl)-3-oxo-5-phenyl-1,2,3,3*a*,5,7*a*-hexahydro-4*H*-indene-4,4-dicarboxylate (**4ba**)

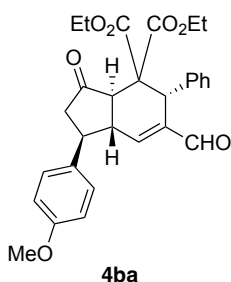

**Second reaction time:** 3 h

**Isolated yield:** 52% (119 mg)

**Physical state:** a yellow oil

**Optical rotation:**  $[\alpha]_D^{26} = -99.3$  (*c* 1.03,  $CHCl_3$ )

**IR (neat):**  $\nu_{max}$  2982, 1747, 1691, 1515, 1455, 1251, 1036, 912, 833, 733, 703  $cm^{-1}$

<sup>1</sup>H NMR (400 MHz, CDCl<sub>3</sub>): δ 9.31 (s, 1H), 7.32-7.20 (m, 5H), 7.12 (d, *J* = 6.8 Hz, 2H), 6.97 (d, *J* = 8.8 Hz, 2H), 6.90 (brs, 1H), 4.96 (s, 1H), 4.39-4.17 (m, 2H), 3.87 (m, 1H), 3.85 (s, 3H), 3.64 (m, 1H), 3.28 (td, *J* = 10.8, 8.0 Hz, 1H), 3.04 (d, *J* = 14.0 Hz, 1H), 2.97 (dd, *J* = 19.2, 8.0 Hz, 1H), 2.78 (ddt, *J* = 14.0, 10.8, 2.0 Hz, 1H), 2.49 (dd, *J* = 19.2, 10.8 Hz, 1H), 1.29 (t, *J* = 7.2 Hz, 3H), 0.90 (t, *J* = 7.2 Hz, 3H)

<sup>13</sup>C NMR (100 MHz, CDCl<sub>3</sub>): δ 205.8, 191.5, 168.5, 167.1, 159.1, 146.3, 142.8, 138.0, 131.0, 128.8, 128.5, 128.3, 127.8, 114.5, 62.1, 61.5, 59.8, 55.3, 51.5, 47.2, 45.8, 45.7, 43.5, 14.1, 13.4

HRMS (ESI): calcd. for C<sub>29</sub>H<sub>30</sub>NaO<sub>7</sub> [M+Na]<sup>+</sup> 513.1884, found 513.1887.

Chiral HPLC: (IB, hexane/*i*-PrOH = 90:10, flow rate = 1.0 mL/min, λ = 208 nm) t<sub>major</sub> = 19.0 min, t<sub>minor</sub> = 28.0 min (>99% ee)

Purification: Flash column chromatography on silica gel (hexane/EtOAc = 8:1 to 5:1)

Diethyl (1*S*,3*aR*,5*R*,7*aR*)-1-(4-chlorophenyl)-6-formyl-3-oxo-5-phenyl-1,2,3,3*a*,5,7*a*-hexahydro-4*H*-indene-4,4-dicarboxylate (4da)

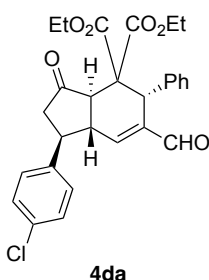

Second reaction time: 3 h

Isolated yield: 58% (135 mg)

Physical state: a yellow oil

Optical rotation: [α]<sub>D</sub><sup>26</sup> = -95.5 (*c* 1.14, CHCl<sub>3</sub>)

IR (neat): ν<sub>max</sub> 2981, 1748, 1691, 1493, 1227, 1092, 1013, 912, 732, 703 cm<sup>-1</sup>

<sup>1</sup>H NMR (400 MHz, CDCl<sub>3</sub>): δ 9.31 (s, 1H), 7.53-7.07 (m, 9H), 6.86 (brs, 1H), 4.96 (s, 1H), 4.38-4.17 (m, 2H), 3.95-3.59 (m, 2H), 3.32 (td, *J* = 10.8, 8.0 Hz, 1H), 3.06 (d, *J* = 14.0 Hz, 1H), 2.99 (dd, *J* = 19.2, 8.0 Hz, 1H), 2.81 (ddt, *J* = 14.0, 10.8, 2.0 Hz, 1H), 2.48 (dd, *J* = 19.2, 10.8 Hz, 1H), 1.29 (t, *J* = 7.2 Hz, 3H), 0.90 (t, *J* = 7.2 Hz, 3H)

<sup>13</sup>C NMR (100 MHz, CDCl<sub>3</sub>): δ 205.1, 191.3, 168.4, 166.9, 145.5, 143.0, 137.8,

137.7, 133.5, 129.4, 128.8, 128.6, 128.5, 127.8, 62.2, 61.5, 59.7, 51.4, 47.0, 45.6, 45.4, 43.7, 14.1, 13.4

**HRMS (ESI):** calcd. for C<sub>28</sub>H<sub>27</sub>ClNaO<sub>6</sub> [M+Na]<sup>+</sup> 517.1389, found 517.1385

**Chiral HPLC:** (IB, hexane/*i*-PrOH = 95:5, flow rate = 1.0 mL/min, λ = 208 nm) t<sub>major</sub> = 23.1 min, t<sub>minor</sub> = 43.1 min (>99% ee)

**Purification:** Flash column chromatography on silica gel (hexane/EtOAc = 8:1 to 6:1)

Diethyl (1*S*,3*aR*,5*R*,7*aR*)-1-(4-bromophenyl)-6-formyl-3-oxo-5-phenyl-1,2,3,3*a*,5,7*a*-hexahydro-4*H*-indene-4,4-dicarboxylate (4fa)

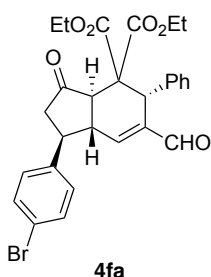

**Second reaction time:** 3 h

**Isolated yield:** 58% (146 mg)

**Physical state:** a yellow oil

**Optical rotation:** [α]<sub>D</sub><sup>26</sup> = -85.5 (*c* 1.10, CHCl<sub>3</sub>)

**IR (neat):** ν<sub>max</sub> 2982, 1747, 1692, 1490, 1367, 1227, 1010, 911, 827, 732, 703 cm<sup>-1</sup>

**<sup>1</sup>H NMR (400 MHz, CDCl<sub>3</sub>):** δ 9.31 (s, 1H), 7.58-7.07 (m, 9H), 6.86 (brs, 1H), 4.96 (s, 1H), 4.38-4.18 (m, 2H), 3.95-3.59 (m, 2H), 3.31 (td, *J* = 10.8, 8.0 Hz, 1H), 3.05 (d, *J* = 14.0 Hz, 1H), 2.99 (dd, *J* = 19.2, 8.0 Hz, 1H), 2.80 (ddt, *J* = 14.0, 10.8, 2.0 Hz, 1H), 2.48 (dd, *J* = 19.2, 10.8 Hz, 1H), 1.29 (t, *J* = 7.2 Hz, 3H), 0.90 (t, *J* = 7.2 Hz, 3H)

**<sup>13</sup>C NMR (100 MHz, CDCl<sub>3</sub>):** δ 205.1, 191.3, 168.4, 166.9, 145.5, 143.0, 138.2, 137.8, 132.3, 129.2, 129.0, 128.5, 127.8, 121.5, 62.2, 61.5, 59.7, 51.4, 46.9, 45.6, 45.3, 43.8, 14.1, 13.4

**HRMS (ESI):** calcd. for C<sub>28</sub>H<sub>27</sub>BrNaO<sub>6</sub> [M+Na]<sup>+</sup> 561.0884, found 561.0880

**Chiral HPLC:** (IB, hexane/*i*-PrOH = 29:1, flow rate = 1.0 mL/min, λ = 208 nm) t<sub>major</sub> = 36.7 min, t<sub>minor</sub> = 68.2 min (>99% ee)

**Purification:** Flash column chromatography on silica gel (hexane/EtOAc = 8:1 to 6:1)

Diethyl (1*S*,3*aR*,5*R*,7*aR*)-6-formyl-3-oxo-5-phenyl-1-(4-(trifluoromethyl)phenyl)-1,2,3,3*a*,5,7*a*-hexahydro-4*H*-indene-4,4-dicarboxylate (4ea)

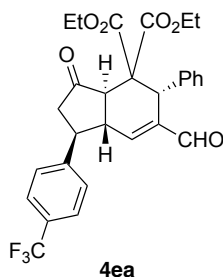

**Second reaction time:** 3 h

**Isolated yield:** 56% (138 mg)

**Physical state:** a yellow oil

**Optical rotation:**  $[\alpha]_{\text{D}}^{26} = -111$  ( $c$  1.00,  $\text{CHCl}_3$ )

**IR (neat):**  $\nu_{\text{max}}$  2985, 1748, 1693, 1327, 1228, 1166, 1124, 1069, 733, 703  $\text{cm}^{-1}$

**$^1\text{H}$  NMR (400 MHz,  $\text{CDCl}_3$ ):**  $\delta$  9.31 (s, 1H), 7.71 (d,  $J = 8.0$  Hz, 2H), 7.48 (d,  $J = 8.0$  Hz, 2H), 7.36-7.20 (m, 3H), 7.11 (d,  $J = 6.4$  Hz, 2H), 6.85 (brs, 1H), 4.97 (s, 1H), 4.40-4.21 (m, 2H), 3.95-3.60 (m, 2H), 3.41 (td,  $J = 10.8, 8.0$  Hz, 1H), 3.08 (d,  $J = 14.0$  Hz, 1H), 3.03 (dd,  $J = 19.2, 8.0$  Hz, 1H), 2.88 (ddt,  $J = 14.0, 10.8, 2.0$  Hz, 1H), 2.53 (dd,  $J = 19.2, 10.8$  Hz, 1H), 1.30 (t,  $J = 7.2$  Hz, 3H), 0.91 (t,  $J = 7.2$  Hz, 3H)

**$^{13}\text{C}$  NMR (100 MHz,  $\text{CDCl}_3$ ):**  $\delta$  204.8, 191.3, 168.4, 166.9, 145.1, 143.4, 143.1, 137.7, 130.1 (q,  $J = 32.7$  Hz), 128.8, 128.5, 127.9, 127.8, 126.2 (q,  $J = 3.1$  Hz), 123.9 (q,  $J = 271$  Hz), 62.3, 61.6, 59.7, 51.4, 46.8, 45.6, 45.3, 44.1, 14.1, 13.4

**HRMS (ESI):** calcd. for  $\text{C}_{29}\text{H}_{27}\text{F}_3\text{NaO}_6$   $[\text{M}+\text{Na}]^+$  551.1652, found 551.1649

**Chiral HPLC:** (IB, hexane/*i*-PrOH = 90:10, flow rate = 1.0 mL/min,  $\lambda = 208$  nm)  $t_{\text{major}} = 9.7$  min,  $t_{\text{minor}} = 17.4$  min (>99% ee)

**Purification:** Flash column chromatography on silica gel (hexane/EtOAc = 8:1 to 6:1)

Diethyl (1*R*,3*aR*,5*R*,7*aS*)-6-formyl-1-((*E*)-4-methoxystyryl)-3-oxo-5-phenyl-1,2,3,3*a*,5,7*a*-hexahydro-4*H*-indene-4,4-dicarboxylate (4ka)

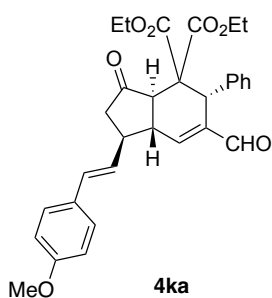

**Second reaction time:** 3 h

**Isolated yield:** 22% (54 mg)

**Physical state:** a yellow oil

**Optical rotation:**  $[\alpha]_{\text{D}}^{24} = -7.10$  ( $c$  1.25,  $\text{CHCl}_3$ )

**IR (neat):**  $\nu_{\text{max}}$  2983, 1742, 1690, 1607, 1511, 1251, 1175, 1034, 913, 732  $\text{cm}^{-1}$

**$^1\text{H}$  NMR (400 MHz,  $\text{CDCl}_3$ ):**  $\delta$  9.39 (s, 1H), 7.37 (d,  $J = 8.8$  Hz, 2H), 7.37-7.07 (m, 6H), 6.89 (d,  $J = 8.8$  Hz, 2H), 6.64 (d,  $J = 16.0$  Hz, 1H), 6.02 (dd,  $J = 16.0$ , 8.4 Hz, 1H), 4.96 (s, 1H), 4.31-4.19 (m, 2H), 3.86 (m, 1H), 3.83 (s, 3H), 3.65 (m, 1H), 2.95 (d,  $J = 14.0$  Hz, 1H), 2.93-2.79 (m, 2H), 2.52 (ddt,  $J = 14.0$ , 10.8, 2.0 Hz, 1H), 2.29 (dd,  $J = 18.8$ , 10.0 Hz, 1H), 1.26 (t,  $J = 7.2$  Hz, 3H), 0.90 (t,  $J = 7.2$  Hz, 3H)

**$^{13}\text{C}$  NMR (100 MHz,  $\text{CDCl}_3$ ):**  $\delta$  205.8, 191.5, 168.5, 167.1, 159.5, 146.4, 142.9, 138.0, 132.7, 129.0, 128.9, 128.5, 127.8, 127.5, 126.1, 114.2, 62.2, 61.5, 59.8, 55.3, 50.9, 45.8, 45.7, 44.5, 42.5, 14.0, 13.4

**HRMS (ESI):** calcd. for  $\text{C}_{31}\text{H}_{32}\text{NaO}_7$   $[\text{M}+\text{Na}]^+$  539.2040, found 539.2037

**Chiral HPLC:** (IF, hexane/*i*-PrOH = 90:10, flow rate = 1.0 mL/min,  $\lambda = 208$  nm)  $t_{\text{minor}} = 31.5$  min,  $t_{\text{major}} = 38.1$  min (>99% ee)

**Purification:** Flash column chromatography on silica gel (hexane/EtOAc = 8:1 to 5:1)

**Diethyl (1*S*,3*aR*,5*R*,7*aR*)-6-formyl-5-(4-methoxyphenyl)-3-oxo-1-phenyl-1,2,3,3*a*,5,7*a*-hexahydro-4*H*-indene-4,4-dicarboxylate (4ab)**

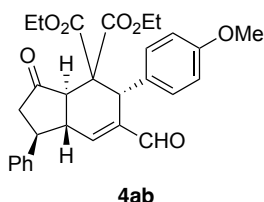

**Second reaction time:** 6 h

**Isolated yield:** 56% (129 mg)

**Physical state:** a yellow oil

**Optical rotation:**  $[\alpha]_{\text{D}}^{27} = -183$  ( $c$  1.10,  $\text{CHCl}_3$ )

**IR (neat):**  $\nu_{\text{max}}$  2979, 1742, 1691, 1609, 1511, 1367, 1252, 1179, 1034, 754, 702  $\text{cm}^{-1}$

**$^1\text{H}$  NMR (400 MHz,  $\text{CDCl}_3$ ):**  $\delta$  9.30 (s, 1H), 7.54-6.78 (m, 10H), 4.91 (s, 1H), 4.38-4.17 (m, 2H), 3.92 (m, 1H), 3.77 (s, 3H), 3.75 (m, 1H), 3.33 (td,  $J = 10.8, 8.0$  Hz, 1H), 3.04 (d,  $J = 14.0$  Hz, 1H), 3.00 (dd,  $J = 19.2, 8.0$  Hz, 1H), 2.82 (ddt,  $J = 14.0, 10.8, 2.0$  Hz, 1H), 2.53 (dd,  $J = 19.2, 10.8$  Hz, 1H), 1.29 (t,  $J = 7.2$  Hz, 3H), 0.97 (t,  $J = 7.2$  Hz, 3H)

**$^{13}\text{C}$  NMR (100 MHz,  $\text{CDCl}_3$ ):**  $\delta$  205.7, 191.5, 168.5, 167.1, 159.2, 145.6, 143.0, 139.3, 129.9, 129.2, 127.8, 127.4, 127.3, 113.9, 62.1, 61.5, 59.8, 55.2, 51.4, 47.1, 45.5, 45.0, 44.3, 14.1, 13.5

**HRMS (ESI):** calcd. for  $\text{C}_{29}\text{H}_{30}\text{NaO}_7$   $[\text{M}+\text{Na}]^+$  513.1884, found 513.1881

**Chiral HPLC:** (AD-H, hexane/*i*-PrOH = 90:10, flow rate = 1.0 mL/min,  $\lambda = 208$  nm)  
 $t_{\text{minor}} = 25.0$  min,  $t_{\text{major}} = 29.7$  min (>99% ee)

**Purification:** Flash column chromatography on silica gel (hexane/EtOAc = 5:1 to 4:1)

Diethyl (1*S*,3*aR*,5*R*,7*aR*)-5-(4-fluorophenyl)-6-formyl-3-oxo-1-phenyl-1,2,3,3*a*,5,7*a*-hexahydro-4*H*-indene-4,4-dicarboxylate (**4ac**)

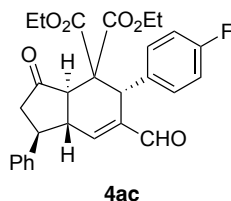

**Second reaction time:** 3 h

**Isolated yield:** 65% (145 mg)

**Physical state:** a yellow oil

**Optical rotation:**  $[\alpha]_{\text{D}}^{25} = -189$  ( $c$  1.06,  $\text{CHCl}_3$ )

**IR (neat):**  $\nu_{\text{max}}$  2983, 1744, 1690, 1508, 1367, 1226, 1163, 1097, 912, 732, 701  $\text{cm}^{-1}$

**$^1\text{H}$  NMR (400 MHz,  $\text{CDCl}_3$ ):**  $\delta$  9.30 (s, 1H), 7.48-6.95 (m, 9H), 6.90 (brs, 1H), 4.94 (s, 1H), 4.39-4.18 (m, 2H), 3.97-3.67 (m, 2H), 3.33 (td,  $J = 10.8, 8.0$  Hz, 1H), 3.01 (dd,  $J = 19.2, 8.0$  Hz, 1H), 3.00 (d,  $J = 14.0$  Hz, 1H), 2.83 (ddt,  $J = 14.0, 10.8, 2.0$  Hz, 1H), 2.54 (dd,  $J = 19.2, 10.8$  Hz, 1H), 1.30 (t,  $J = 7.2$  Hz,

3H), 0.97 (t,  $J = 7.2$  Hz, 3H)

$^{13}\text{C}$  NMR (100 MHz,  $\text{CDCl}_3$ ):  $\delta$  205.4, 191.4, 168.3, 167.0, 162.3 (d,  $J = 246$  Hz), 146.4, 142.8, 139.1, 133.8 (d,  $J = 3.1$  Hz), 130.4, 129.2, 127.8, 127.3, 115.4 (d,  $J = 21.3$  Hz), 62.2, 61.6, 59.7, 51.4, 47.1, 45.5, 44.9, 44.3, 14.1, 13.5

HRMS (ESI): calcd. for  $\text{C}_{28}\text{H}_{27}\text{FNaO}_6$   $[\text{M}+\text{Na}]^+$  501.1684, found 501.1687

Chiral HPLC: (AD-H, hexane/*i*-PrOH = 90:10, flow rate = 1.0 mL/min,  $\lambda = 208$  nm)  
 $t_{\text{minor}} = 15.6$  min,  $t_{\text{major}} = 20.7$  min (97% ee)

Purification: Flash column chromatography on silica gel (hexane/EtOAc = 8:1 to 5:1)

Diethyl (1*S*,3*aR*,5*R*,7*aR*)-5-(4-chlorophenyl)-6-formyl-3-oxo-1-phenyl-1,2,3,3*a*,5,7*a*-hexahydro-4*H*-indene-4,4-dicarboxylate (4ad)

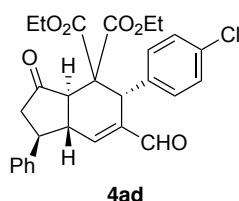

Second reaction time: 2 h

Isolated yield: 65% (151 mg)

Physical state: a yellow oil

Optical rotation:  $[\alpha]_{\text{D}}^{23} = -176$  ( $c$  1.04,  $\text{CHCl}_3$ )

IR (neat):  $\nu_{\text{max}}$  2983, 1747, 1691, 1493, 1227, 1094, 755, 701  $\text{cm}^{-1}$

$^1\text{H}$  NMR (400 MHz,  $\text{CDCl}_3$ ):  $\delta$  9.30 (s, 1H), 7.48-7.02 (m, 9H), 6.91 (brs, 1H), 4.93 (s, 1H), 4.39-4.18 (m, 2H), 3.97-3.69 (m, 2H), 3.32 (td,  $J = 10.8, 8.0$  Hz, 1H), 3.01 (dd,  $J = 19.2, 8.0$  Hz, 1H), 2.99 (d,  $J = 14.0$  Hz, 1H), 2.84 (ddt,  $J = 14.0, 10.8, 2.0$  Hz, 1H), 2.54 (dd,  $J = 19.2, 10.8$  Hz, 1H), 1.30 (t,  $J = 7.2$  Hz, 3H), 0.96 (t,  $J = 7.2$  Hz, 3H)

$^{13}\text{C}$  NMR (100 MHz,  $\text{CDCl}_3$ ):  $\delta$  205.4, 191.3, 168.3, 166.9, 146.7, 142.6, 139.1, 136.6, 133.8, 130.1, 129.3, 128.6, 127.8, 127.3, 62.3, 61.7, 59.6, 51.4, 47.0, 45.5, 45.0, 44.2, 14.1, 13.4

HRMS (ESI): calcd. for  $\text{C}_{28}\text{H}_{27}\text{ClNaO}_6$   $[\text{M}+\text{Na}]^+$  517.1389, found 517.1389

Chiral HPLC: (AD-H, hexane/*i*-PrOH = 90:10, flow rate = 1.0 mL/min,  $\lambda = 208$  nm)  
 $t_{\text{minor}} = 14.8$  min,  $t_{\text{major}} = 24.5$  min (>99% ee)

Purification: Flash column chromatography on silica gel (hexane/EtOAc = 8:1 to 6:1)



Diethyl (1*S*,3*aR*,5*R*,7*aR*)-6-formyl-3-oxo-1-phenyl-5-(4-(trifluoromethyl)phenyl)-1,2,3,3*a*,5,7*a*-hexahydro-4*H*-indene-4,4-dicarboxylate (4ae)

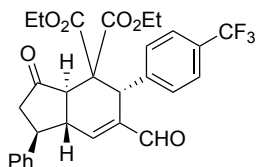

4ae

Second reaction time: 2 h

Isolated yield: 61% (151 mg)

Physical state: a yellow oil

Optical rotation:  $[\alpha]_{\text{D}}^{21} = -168$  ( $c$  1.26,  $\text{CHCl}_3$ )

IR (neat):  $\nu_{\text{max}}$  2981, 1745, 1691, 1327, 1228, 1166, 1115, 1069, 913, 732, 701  $\text{cm}^{-1}$

$^1\text{H NMR}$  (400 MHz,  $\text{CDCl}_3$ ):  $\delta$  9.32 (s, 1H), 7.58-7.22 (m, 9H), 6.97 (brs, 1H), 5.02 (s, 1H), 4.40-4.19 (m, 2H), 3.93-3.61 (m, 2H), 3.35 (td,  $J = 10.8, 8.0$  Hz, 1H), 3.01 (dd,  $J = 19.2, 8.0$  Hz, 1H), 2.99 (d,  $J = 14.0$  Hz, 1H), 2.86 (ddt,  $J = 14.0, 10.8, 2.0$  Hz, 1H), 2.56 (dd,  $J = 19.2, 10.8$  Hz, 1H), 1.31 (t,  $J = 7.2$  Hz, 3H), 0.88 (t,  $J = 7.2$  Hz, 3H)

$^{13}\text{C NMR}$  (100 MHz,  $\text{CDCl}_3$ ):  $\delta$  205.3, 191.3, 168.1, 166.9, 147.3, 142.3, 138.9, 130.0 (q,  $J = 32.7$  Hz), 129.3, 127.9, 127.2, 125.4 (q,  $J = 3.0$  Hz), 123.9 (q,  $J = 27.1$  Hz), 62.4, 61.7, 59.6, 51.5, 47.0, 45.5, 45.3, 44.2, 14.1, 13.2

HRMS (ESI): calcd. for  $\text{C}_{29}\text{H}_{27}\text{F}_3\text{NaO}_6$   $[\text{M}+\text{Na}]^+$  551.1652, found 551.1651

Chiral HPLC: (AD-H, hexane/*i*-PrOH = 90:10, flow rate = 1.0 mL/min,  $\lambda = 208$  nm)  $t_{\text{minor}} = 9.7$  min,  $t_{\text{major}} = 18.4$  min (>99% ee)

Purification: Flash column chromatography on silica gel (hexane/EtOAc = 8:1 to 6:1)

Diethyl (1*S*,3*aR*,5*R*,7*aR*)-5-(4-bromophenyl)-6-formyl-3-oxo-1-phenyl-1,2,3,3*a*,5,7*a*-hexahydro-4*H*-indene-4,4-dicarboxylate (4af)

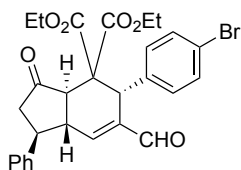

4af

Second reaction time: 2 h

**Isolated yield:** 60% (151 mg)

**Physical state:** a yellow oil

**Optical rotation:**  $[\alpha]_{\text{D}}^{23} = -165$  ( $c$  1.18,  $\text{CHCl}_3$ )

**IR (neat):**  $\nu_{\text{max}}$  2982, 1747, 1692, 1488, 1367, 1227, 1011, 879, 754, 701  $\text{cm}^{-1}$

**$^1\text{H}$  NMR (400 MHz,  $\text{CDCl}_3$ ):**  $\delta$  9.30 (s, 1H), 7.48-6.95 (m, 9H), 6.91 (brs, 1H), 4.91 (s, 1H), 4.39-4.18 (m, 2H), 3.97-3.69 (m, 2H), 3.32 (td,  $J = 10.8, 8.0$  Hz, 1H), 3.00 (dd,  $J = 19.2, 8.0$  Hz, 1H), 2.98 (d,  $J = 14.0$  Hz, 1H), 2.84 (ddt,  $J = 14.0, 10.8, 2.0$  Hz, 1H), 2.54 (dd,  $J = 19.2, 10.8$  Hz, 1H), 1.30 (t,  $J = 7.2$  Hz, 3H), 0.96 (t,  $J = 7.2$  Hz, 3H)

**$^{13}\text{C}$  NMR (100 MHz,  $\text{CDCl}_3$ ):**  $\delta$  205.3, 191.3, 168.2, 166.9, 146.8, 142.5, 139.0, 137.2, 131.6, 130.4, 129.3, 127.8, 127.3, 121.9, 62.3, 61.7, 59.6, 51.4, 47.0, 45.5, 45.1, 44.2, 14.1, 13.4

**HRMS (ESI):** calcd. for  $\text{C}_{28}\text{H}_{27}\text{BrNaO}_6$   $[\text{M}+\text{Na}]^+$  561.0884, found 561.0888

**Chiral HPLC:** (AD-H, hexane/*i*-PrOH = 90:10, flow rate = 1.0 mL/min,  $\lambda = 208$  nm)  
 $t_{\text{minor}} = 15.6$  min,  $t_{\text{major}} = 27.6$  min (>99% ee)

**Purification:** Flash column chromatography on silica gel (hexane/EtOAc = 8:1 to 6:1)

Diethyl (1*S*,3*aR*,5*R*,7*aR*)-5-(3-bromophenyl)-6-formyl-3-oxo-1-phenyl-1,2,3,3*a*,5,7*a*-hexahydro-4*H*-indene-4,4-dicarboxylate (**4ag**)

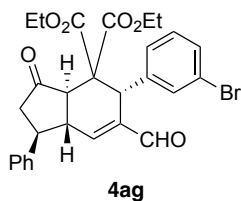

**Second reaction time:** 2 h

**Isolated yield:** 62% (156 mg)

**Physical state:** a yellow oil

**Optical rotation:**  $[\alpha]_{\text{D}}^{26} = -124$  ( $c$  1.16,  $\text{CHCl}_3$ )

**IR (neat):**  $\nu_{\text{max}}$  2982, 1747, 1690, 1473, 1366, 1227, 1053, 913, 732, 699  $\text{cm}^{-1}$

**$^1\text{H}$  NMR (400 MHz,  $\text{CDCl}_3$ ):**  $\delta$  9.31 (s, 1H), 7.49-7.00 (m, 9H), 6.93 (brs, 1H), 4.92 (s, 1H), 4.39-4.18 (m, 2H), 3.99-3.68 (m, 2H), 3.33 (td,  $J = 10.8, 8.0$  Hz, 1H), 3.02 (dd,  $J = 19.2, 8.0$  Hz, 1H), 2.98 (d,  $J = 14.0$  Hz, 1H), 2.83 (ddt,  $J = 14.0, 10.8, 2.0$  Hz, 1H), 2.54 (dd,  $J = 19.2, 10.8$  Hz, 1H), 1.30 (t,  $J = 7.2$  Hz, 3H), 0.98 (t,  $J = 7.2$  Hz, 3H)

<sup>13</sup>C NMR (100 MHz, CDCl<sub>3</sub>): δ 205.4, 191.3, 168.2, 166.8, 147.0, 142.3, 140.5, 139.0, 130.9, 129.9, 129.2, 127.8, 127.3, 122.7, 62.3, 61.8, 59.7, 51.4, 47.1, 45.4, 45.2, 44.1, 14.1, 13.5

HRMS (ESI): calcd. for C<sub>28</sub>H<sub>27</sub>BrNaO<sub>6</sub> [M+Na]<sup>+</sup> 561.0884, found 561.0888

Chiral HPLC: (AD-H, hexane/*i*-PrOH = 90:10, flow rate = 1.0 mL/min, λ = 208 nm)  
t<sub>minor</sub> = 17.2 min, t<sub>major</sub> = 20.3 min (98% ee)

Purification: Flash column chromatography on silica gel (hexane/EtOAc = 8:1 to 5:1)

Diethyl (1*S*,3*aR*,5*R*,7*aR*)-5-(2-bromophenyl)-6-formyl-3-oxo-1-phenyl-1,2,3,3*a*,5,7*a*-hexahydro-4*H*-indene-4,4-dicarboxylate (4ah)

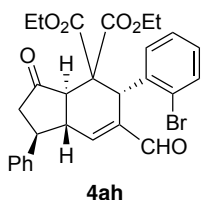

Second reaction time: 9 h

Isolated yield: 56% (141 mg)

Physical state: a yellow oil

Optical rotation: [α]<sub>D</sub><sup>26</sup> = -95.8 (*c* 1.10, CHCl<sub>3</sub>)

IR (neat): ν<sub>max</sub> 2982, 1745, 1692, 1468, 1367, 1257, 1024, 911, 732, 702 cm<sup>-1</sup>

<sup>1</sup>H NMR (400 MHz, CDCl<sub>3</sub>): δ 9.27 (s, 1H), 7.62-6.97 (m, 9H), 6.94 (brs, 1H), 5.68 (s, 1H), 4.43-4.19 (m, 2H), 3.96 (q, *J* = 7.2 Hz, 2H), 3.32 (m, 1H), 3.10-2.94 (m, 3H), 2.59 (dd, *J* = 19.2, 10.8 Hz, 1H), 1.33 (t, *J* = 7.2 Hz, 3H), 1.02 (t, *J* = 7.2 Hz, 3H)

<sup>13</sup>C NMR (100 MHz, CDCl<sub>3</sub>): δ 206.2, 191.1, 168.4, 167.0, 146.5, 143.5, 139.2, 138.0, 133.4, 129.6, 129.3, 129.0, 127.8, 127.3, 127.1, 126.8, 62.3, 62.0, 58.5, 52.6, 47.1, 45.2, 44.5, 44.2, 14.1, 13.4

HRMS (ESI): calcd. for C<sub>28</sub>H<sub>27</sub>BrNaO<sub>6</sub> [M+Na]<sup>+</sup> 561.0884, found 561.0886

Chiral HPLC: (AD-H, hexane/*i*-PrOH = 90:10, flow rate = 1.0 mL/min, λ = 208 nm)  
t<sub>minor</sub> = 35.7 min, t<sub>major</sub> = 39.7 min (>99% ee)

Purification: Flash column chromatography on silica gel (hexane/EtOAc = 8:1 to 5:1)

Diethyl (1*S*,3*aR*,5*R*,7*aR*)-6-formyl-5-(4-nitrophenyl)-3-oxo-1-phenyl-1,2,3,3*a*,5,7*a*-hexahydro-4*H*-indene-4,4-dicarboxylate (4ai)

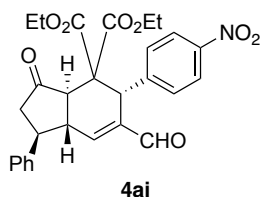

**Second reaction time:** 3 h

**Isolated yield:** 66% (157 mg)

**Physical state:** a brown oil

**Optical rotation:**  $[\alpha]_{\text{D}}^{25} = -136$  ( $c$  1.10,  $\text{CHCl}_3$ )

**IR (neat):**  $\nu_{\text{max}}$  2979, 1735, 1687, 1522, 1348, 1253, 913, 731, 701  $\text{cm}^{-1}$

**$^1\text{H}$  NMR (400 MHz,  $\text{CDCl}_3$ ):**  $\delta$  9.32 (s, 1H), 8.16 (d,  $J = 9.2$  Hz, 2H), 7.52-7.19 (m, 7H), 7.00 (brs, 1H), 5.05 (s, 1H), 4.41-4.21 (m, 2H), 3.97-3.69 (m, 2H), 3.36 (td,  $J = 10.8, 8.0$  Hz, 1H), 3.02 (dd,  $J = 19.2, 8.0$  Hz, 1H), 2.97 (d,  $J = 14.0$  Hz, 1H), 2.88 (ddt,  $J = 14.0, 10.8, 2.0$  Hz, 1H), 2.57 (dd,  $J = 19.2, 10.8$  Hz, 1H), 1.31 (t,  $J = 7.2$  Hz, 3H), 0.97 (t,  $J = 7.2$  Hz, 3H)

**$^{13}\text{C}$  NMR (100 MHz,  $\text{CDCl}_3$ ):**  $\delta$  205.0, 191.2, 167.9, 166.6, 147.9, 147.3, 145.8, 142.1, 138.8, 129.3, 127.9, 127.4, 127.2, 123.6, 62.5, 61.9, 59.5, 51.5, 47.0, 45.4, 45.2, 44.2, 14.1, 13.5

**HRMS (ESI):** calcd. for  $\text{C}_{28}\text{H}_{27}\text{NNaO}_8$   $[\text{M}+\text{Na}]^+$  528.1629, found 528.1628

**Chiral HPLC:** (AD-H, hexane/*i*-PrOH = 80:20, flow rate = 1.0 mL/min,  $\lambda = 208$  nm)  
 $t_{\text{minor}} = 16.2$  min,  $t_{\text{major}} = 29.8$  min (>99% ee)

**Purification:** Flash column chromatography on silica gel (hexane/EtOAc = 8:1 to 5:1)

**Diethyl (1*S*,3*aR*,5*R*,7*aR*)-6-formyl-3-oxo-1,5-diphenyl-1,2,3,3*a*,5,7*a*-hexahydro-4*H*-indene-4,4-dicarboxylate (4aa)**

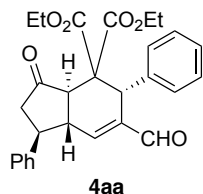

**Second reaction time:** 3 h

**Isolated yield:** 74% (160 mg)

**Physical state:** a yellow oil

**Optical rotation:**  $[\alpha]_{\text{D}}^{28} = -223$  ( $c$  0.98,  $\text{CHCl}_3$ )

**IR (neat):**  $\nu_{\text{max}}$  2982, 1747, 1691, 1454, 1367, 1227, 912, 732, 702  $\text{cm}^{-1}$

**<sup>1</sup>H NMR (400 MHz, CDCl<sub>3</sub>):** δ 9.31 (s, 1H), 7.48-7.08 (m, 10H), 6.90 (brs, 1H), 4.96 (s, 1H), 4.39-4.18 (m, 2H), 3.95-3.60 (m, 2H), 3.34 (td, *J* = 10.8, 8.0 Hz, 1H), 3.07 (d, *J* = 14.0 Hz, 1H), 3.00 (dd, *J* = 19.2, 8.0 Hz, 1H), 2.84 (ddt, *J* = 14.0, 10.8, 2.0 Hz, 1H), 2.54 (dd, *J* = 19.2, 10.8 Hz, 1H), 1.30 (t, *J* = 7.2 Hz, 3H), 0.90 (t, *J* = 7.2 Hz, 3H)

**<sup>13</sup>C NMR (100 MHz, CDCl<sub>3</sub>):** δ 205.6, 191.5, 168.5, 167.1, 146.1, 142.8, 139.2, 137.9, 129.2, 128.5, 127.8, 127.8, 127.3, 62.2, 61.5, 59.8, 51.5, 47.1, 45.7, 45.5, 44.3, 14.1, 13.4

**HRMS (ESI):** calcd. for C<sub>28</sub>H<sub>28</sub>NaO<sub>6</sub> [M+Na]<sup>+</sup> 483.1778, found 483.1775

**Chiral HPLC:** (AD-H, hexane/*i*-PrOH = 90:10, flow rate = 1.0 mL/min, λ = 208 nm)  
t<sub>minor</sub> = 19.0 min, t<sub>major</sub> = 23.1 min (>99% ee)

**Purification:** Flash column chromatography on silica gel (hexane/EtOAc = 8:1 to 5:1)

**Diethyl (1*S*,3*aR*,5*R*,7*aR*)-6-formyl-5-(furan-2-yl)-3-oxo-1-phenyl-1,2,3,3*a*,5,7*a*-hexahydro-4*H*-indene-4,4-dicarboxylate (4aj)**

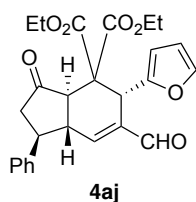

**Second reaction time:** 2 h

**Isolated yield:** 35% (73 mg)

**Physical state:** a brown oil

**Optical rotation:** [α]<sub>D</sub><sup>26</sup> = -191 (*c* 0.20, CHCl<sub>3</sub>)

**IR (neat):** ν<sub>max</sub> 2983, 1736, 1690, 1498, 1367, 1254, 1013, 755, 702 cm<sup>-1</sup>

**<sup>1</sup>H NMR (400 MHz, CDCl<sub>3</sub>):** δ 9.33 (s, 1H), 7.48-7.08 (m, 6H), 6.82 (brs, 1H), 6.28 (dd, *J* = 3.2, 1.6 Hz, 1H), 6.12 (d, *J* = 3.2 Hz, 1H), 5.02 (s, 1H), 4.38-3.86 (m, 4H), 3.37-3.26 (m, 2H), 3.00 (dd, *J* = 19.2, 8.0 Hz, 1H), 2.79 (ddt, *J* = 14.0, 10.8, 2.0 Hz, 1H), 2.53 (dd, *J* = 19.2, 10.8 Hz, 1H), 1.28 (t, *J* = 7.2 Hz, 3H), 1.13 (t, *J* = 7.2 Hz, 3H)

**<sup>13</sup>C NMR (100 MHz, CDCl<sub>3</sub>):** δ 205.6, 191.2, 168.0, 167.1, 150.8, 146.6, 142.6, 140.7, 139.3, 129.2, 127.8, 127.3, 110.7, 109.4, 62.2, 62.0, 58.9, 52.4, 47.0, 45.6, 44.2, 39.7, 14.1, 13.7

**HRMS (ESI):** calcd. for C<sub>26</sub>H<sub>26</sub>NaO<sub>7</sub> [M+Na]<sup>+</sup> 473.1571, found 473.1568

**Chiral HPLC:** (AD-H, hexane/*i*-PrOH = 95:5, flow rate = 1.0 mL/min,  $\lambda$  = 208 nm)  $t_{\text{minor}}$  = 41.9 min,  $t_{\text{major}}$  = 47.9 min (>99% ee)

**Purification:** Flash column chromatography on silica gel (hexane/EtOAc = 8:1 to 5:1)

## 2.5. Determination of the absolute configuration

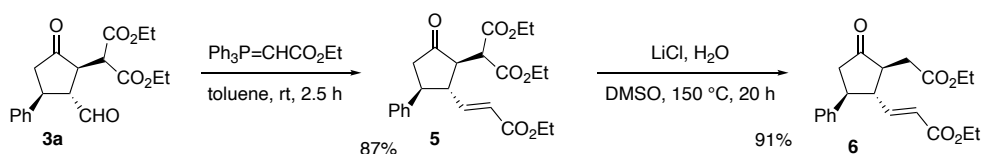

To a stirred solution of **3a** (808 mg, 2.33 mmol) in toluene (4.7 mL) was added  $\text{Ph}_3\text{P}=\text{CHCO}_2\text{Et}$  (2.03 g, 5.83 mmol) at 0 °C. After stirring for 2.5 h at room temperature, the mixture was concentrated under reduced pressure. The residue was purified by silica gel column chromatography (hexane/EtOAc = 7:1) to give **5** (846 mg, 87%).

To a stirred solution of **5** (108 mg, 0.259 mmol) in DMSO (2.6 mL) were added lithium chloride (10.9 mg, 0.259 mmol) and water (9.8 mg, 0.545 mmol) at room temperature. After heating at 150 °C using an oil bath for 20 h, the mixture was extracted with EtOAc. The organic layer was washed with water, dried over anhydrous sodium sulfate, and concentrated under reduced pressure. The residue was purified by silica gel column chromatography (hexane/EtOAc = 4:1) to give **6** (81.3 mg, 91%).

Diethyl 2-((1*R*,2*R*,3*S*)-2-((*E*)-3-ethoxy-3-oxoprop-1-en-1-yl)-5-oxo-3-phenylcyclopentyl)malonate (**5**)

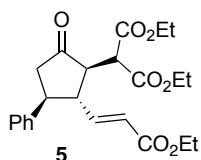

**Physical state:** a yellow oil

**Optical rotation:**  $[\alpha]_{\text{D}}^{26} = +70.9$  ( $c$  1.0,  $\text{CHCl}_3$ )

**IR (neat):**  $\nu_{\text{max}}$  2982, 1736, 1455, 1371, 1339, 1307, 1227, 1175, 1094, 1033, 702  $\text{cm}^{-1}$

**$^1\text{H}$  NMR (400 MHz,  $\text{CDCl}_3$ ):**  $\delta$  7.35-7.21 (m, 5H), 6.73 (dd,  $J = 15.6, 9.2$  Hz, 1H), 5.55 (d,  $J = 15.6$  Hz, 1H), 4.30-4.04 (m, 6H), 3.90 (d,  $J = 4.4$  Hz, 1H), 3.34 (q,  $J = 10.0$  Hz, 1H), 3.15 (td,  $J = 11.6, 8.4$  Hz, 1H), 2.86 (dd,  $J = 12.4, 4.4$  Hz, 1H), 2.81 (dd,  $J = 18.8, 8.4$  Hz, 1H), 2.70 (dd,  $J = 18.8, 12.4$  Hz, 1H), 1.32-1.19 (m, 9H)

$^{13}\text{C}$  NMR (100 MHz,  $\text{CDCl}_3$ ):  $\delta$  212.9, 167.9, 167.6, 165.6, 146.7, 139.9, 128.7, 127.4, 127.2, 123.7, 61.7, 61.6, 60.3, 53.9, 50.2, 49.8, 46.7, 45.3, 14.0, 13.9, 13.8  
HRMS (ESI): calcd. for  $\text{C}_{23}\text{H}_{28}\text{NaO}_7$   $[\text{M}+\text{Na}]^+$  439.1727, found 439.1727

**Ethyl** **(*E*)-3-((1*R*,2*S*,5*S*)-2-(2-ethoxy-2-oxoethyl)-3-oxo-5-phenylcyclopentyl)acrylate (6)**

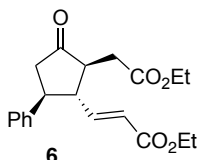

The spectroscopic data of the product agreed with the literature values (*Chem. Sci.* 2020, 11, 1205).

$^1\text{H}$  NMR (400 MHz,  $\text{CDCl}_3$ ):  $\delta$  7.36-7.20 (m, 5H), 6.80 (dd,  $J$  = 15.6, 8.8 Hz, 1H), 5.66 (d,  $J$  = 15.6 Hz, 1H), 4.20-4.06 (m, 4H), 3.18 (td,  $J$  = 11.6, 8.0 Hz, 1H), 3.05 (dd,  $J$  = 11.2, 8.8 Hz, 1H), 2.84 (dd,  $J$  = 18.8, 8.0 Hz, 1H), 2.79 (dd,  $J$  = 17.6, 5.2 Hz, 1H), 2.63 (dd,  $J$  = 18.8, 12.4 Hz, 1H), 2.58 (dd,  $J$  = 17.6, 4.8 Hz, 1H), 2.51 (m, 1H), 1.26 (t,  $J$  = 7.2 Hz, 3H), 1.24 (t,  $J$  = 7.2 Hz, 3H)

**Optical rotation:**  $[\alpha]_{\text{D}}^{24}$  = +92.0 ( $c$  1.0,  $\text{CHCl}_3$ ), Lit.:  $[\alpha]_{\text{D}}^{26}$  = +91.61 ( $c$  1.2,  $\text{CHCl}_3$ )

The absolute configuration was determined by comparison of the optical rotation.



## 2.6. Unsuccessful substrates for this reaction

$\alpha,\beta$ -Unsaturated aldehydes **2l**, **2m**, **2n**, **2o** were not suitable for the second reaction.

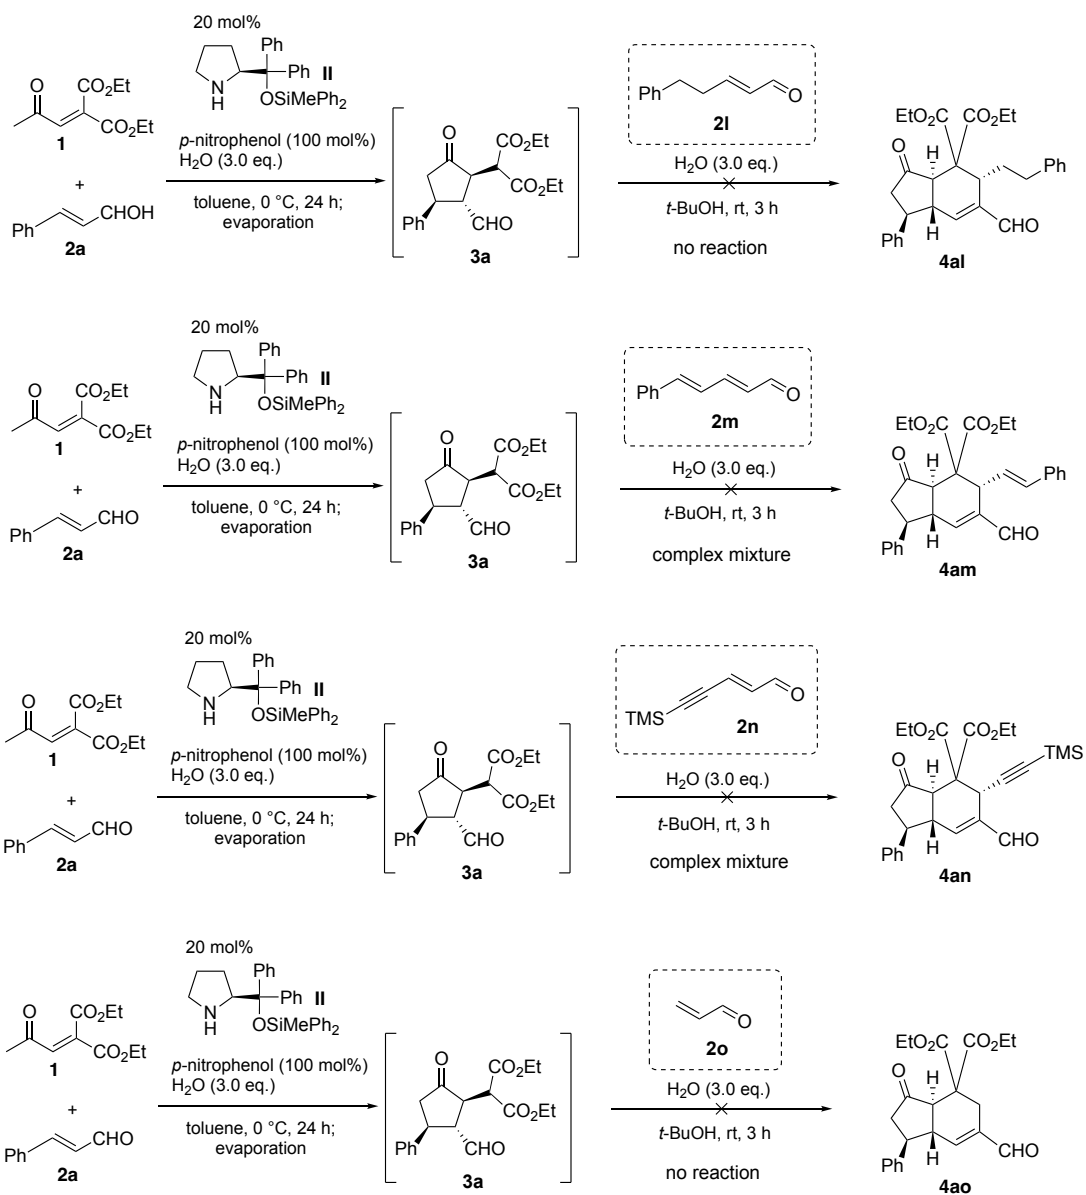

$\alpha,\beta$ -Unsaturated aldehydes **2l**, **2n**, **2o** were not suitable for the first reaction.

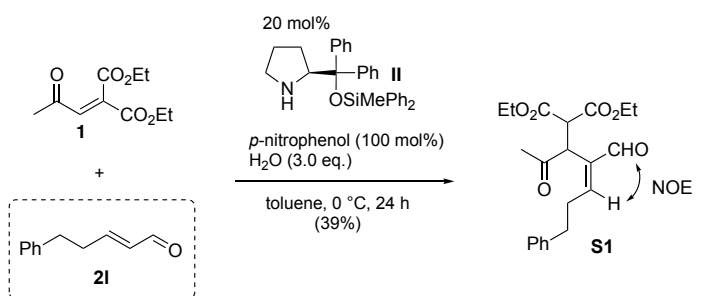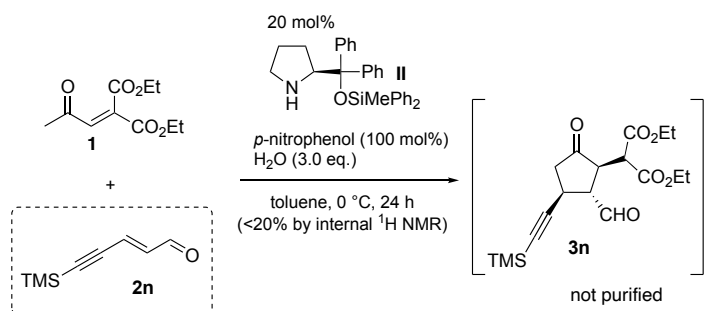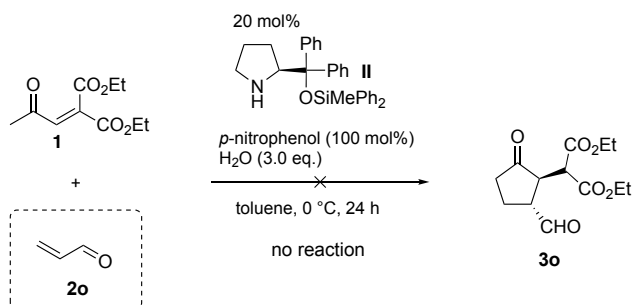

### Diethyl (*E*)-2-(4-formyl-2-oxo-7-phenylhept-4-en-3-yl)malonate (**S1**)

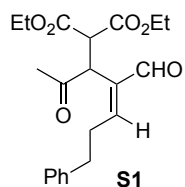

To a stirred solution of **1** (100 mg, 0.467 mmol) and **2l** (75.0 mg, 0.467 mmol) in toluene (0.93 mL) were added water (25.0  $\mu$ L, 1.38 mmol), catalyst **II** (42.0 mg, 93.4  $\mu$ mol), *p*-nitrophenol (65.0 mg, 0.467 mmol) at 0 °C. After stirring for 24 h at 0 °C, sat. K<sub>2</sub>CO<sub>3</sub> solution was added and the mixture was extracted with EtOAc. The organic layer was washed with sat. K<sub>2</sub>CO<sub>3</sub> solution and

brine, dried over anhydrous magnesium sulfate, and concentrated under reduced pressure. The residue was purified by silica gel column chromatography (hexane/EtOAc = 7:1 to 5:1) to give **S1** (69.0 mg, 39%).

**Physical state:** a yellow oil

**Optical rotation:**  $[\alpha]_{\text{D}}^{24} = +82.6$  ( $c$  1.1,  $\text{CHCl}_3$ )

**IR (neat):**  $\nu_{\text{max}}$  2981, 1730, 1686, 1454, 1368, 1264, 1159, 1032, 753, 700  $\text{cm}^{-1}$

**$^1\text{H}$  NMR (400 MHz,  $\text{CDCl}_3$ ):**  $\delta$  9.34 (s, 1H), 7.35-7.15 (m, 5H), 6.75 (t,  $J = 7.2$  Hz, 1H), 4.47 (m, 1H), 4.25-3.96 (m, 5H), 2.88-2.75 (m, 4H), 1.81 (s, 3H), 1.24 (t,  $J = 7.2$  Hz, 3H), 1.15 (t,  $J = 7.2$  Hz, 3H)

**$^{13}\text{C}$  NMR (100 MHz,  $\text{CDCl}_3$ ):**  $\delta$  212.9, 192.9, 167.8, 159.1, 139.8, 128.7, 128.4, 126.5, 61.8, 61.5, 50.9, 34.2, 31.0, 27.3, 13.9, 13.9, 11.7

**HRMS (ESI):** calcd. for  $\text{C}_{21}\text{H}_{26}\text{NaO}_6$   $[\text{M}+\text{Na}]^+$  397.1622, found 397.1631

**Chiral HPLC:** (OZ-H, hexane/*i*-PrOH = 90:10, flow rate = 1.0 mL/min,  $\lambda = 208$  nm)  
 $t_{\text{major}} = 11.6$  min,  $t_{\text{minor}} = 30.0$  min (61% ee)

## 2.7. Attempts to synthesize ketones with other electron withdrawing groups

Preparation of 2-(2-oxopropylidene)malononitrile (**S2**) and 4,4-bis(phenylsulfonyl)but-3-en-2-one (**S3**) with other electron withdrawing functional groups was unsuccessful.

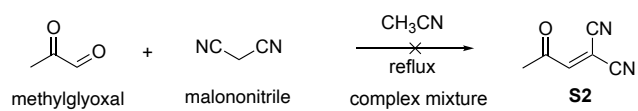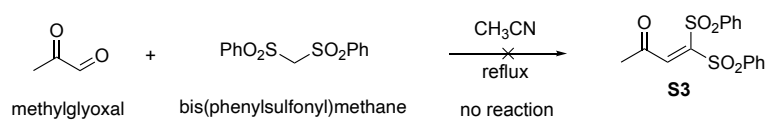

## 2.8. Attempts to transform 4ab and its derivatives

Decarboxylation of **4ab** and its derivatives **S5**, **S7**, **S8** was tried but failed.

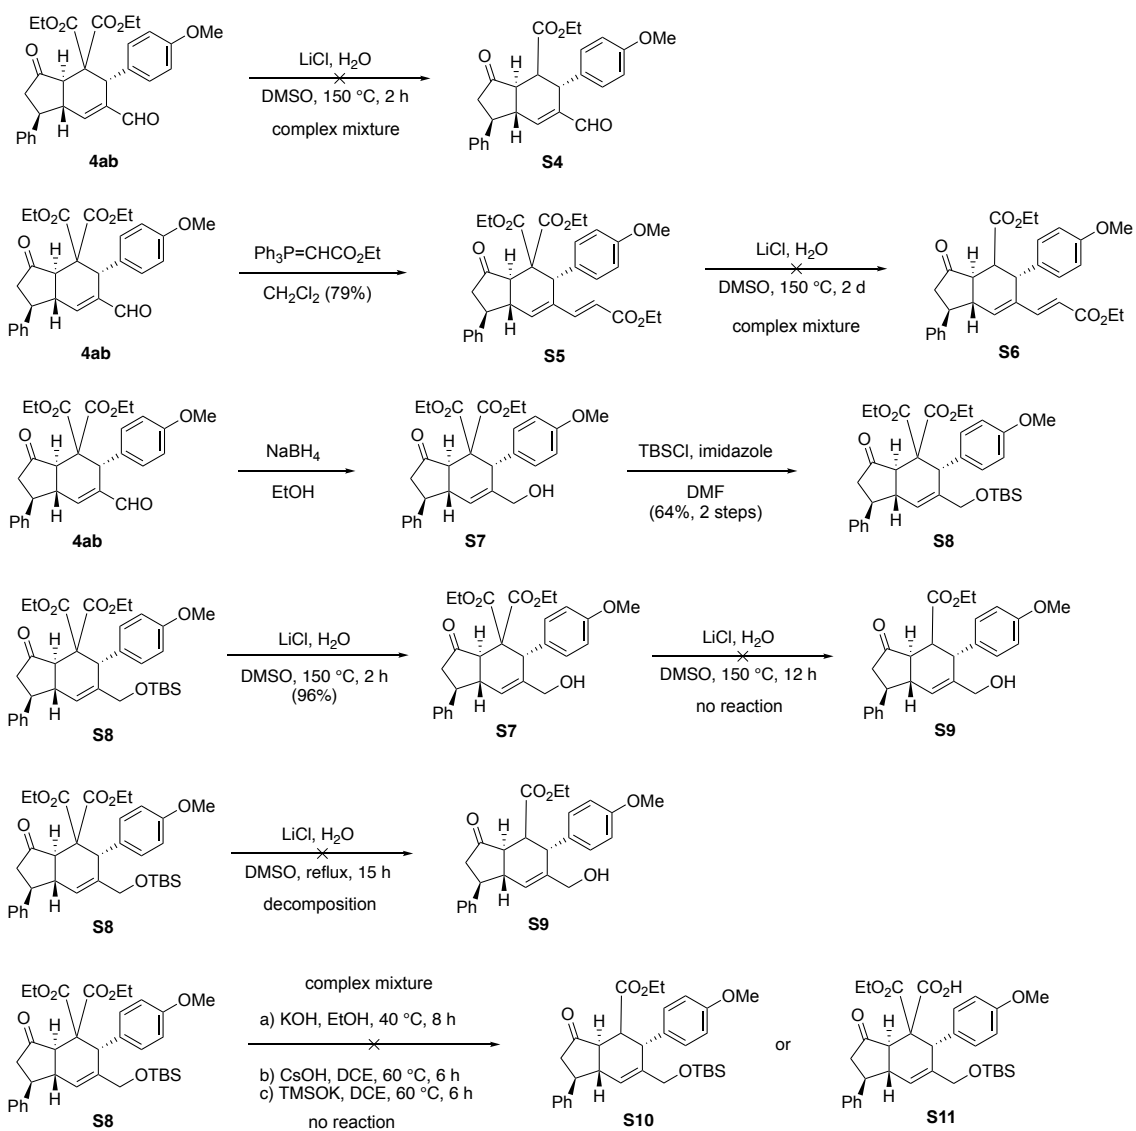

## 2.9. References

- [1] K. Okuro, H. Alper, *J. Org. Chem.* **2012**, *77*, 4420–4424.
- [2] S. R. Smith, S. M. Leckie, R. Holmes, J. Douglas, C. Fallan, P. Shapland, D. Pryde, A. M. Z. Slawin, A. D. Smith, *Org. Lett.* **2014**, *16*, 2506–2509.
- [3] N. T. Patil, V. Singh, *Chem. Commun.* **2011**, *47*, 11116–11118.
- [4] R. Beaud, B. Michelet, Y. Reviriot, A. Martin-Mingot, J. Rodriguez, D. Bonne, S. Thibaudeau, *Angew. Chem. Int. Ed.* **2020**, *59*, 1279–1285.
- [5] E. Kim, M. Koh, B. J. Lim, S. B. Park, *J. Am. Chem. Soc.* **2011**, *133*, 6642–6649.
- [6] L. C. Bencze, A. Filip, G. Bánóczy, M. I. Toşa, F. D. Irimie, Á. Gellért, L. Poppe, C. Paizs, *Org. Biomol. Chem.* **2017**, *15*, 3717–3727.
- [7] P. An, N.-S. Xu, H.-L. Zhang, X.-P. Cao, Z.-F. Shi, W. Wen, *Chem. Asian. J.* **2015**, *10*, 1959–1966.
- [8] Y. Hayashi, H. Gotoh, T. Hayashi, M. Shoji, *Angew. Chem. Int. Ed.* **2005**, *44*, 4212–4215.
- [9] U. Grošelj, D. Seebach, D. M. Badine, W. B. Schweizer, A. K. Beck, I. Krossing, P. Klose, Y. Hayashi, T. Uchimaru, *Helv. Chim. Acta.* **2009**, *92*, 1225–1259.

### 3. Spectra for compounds

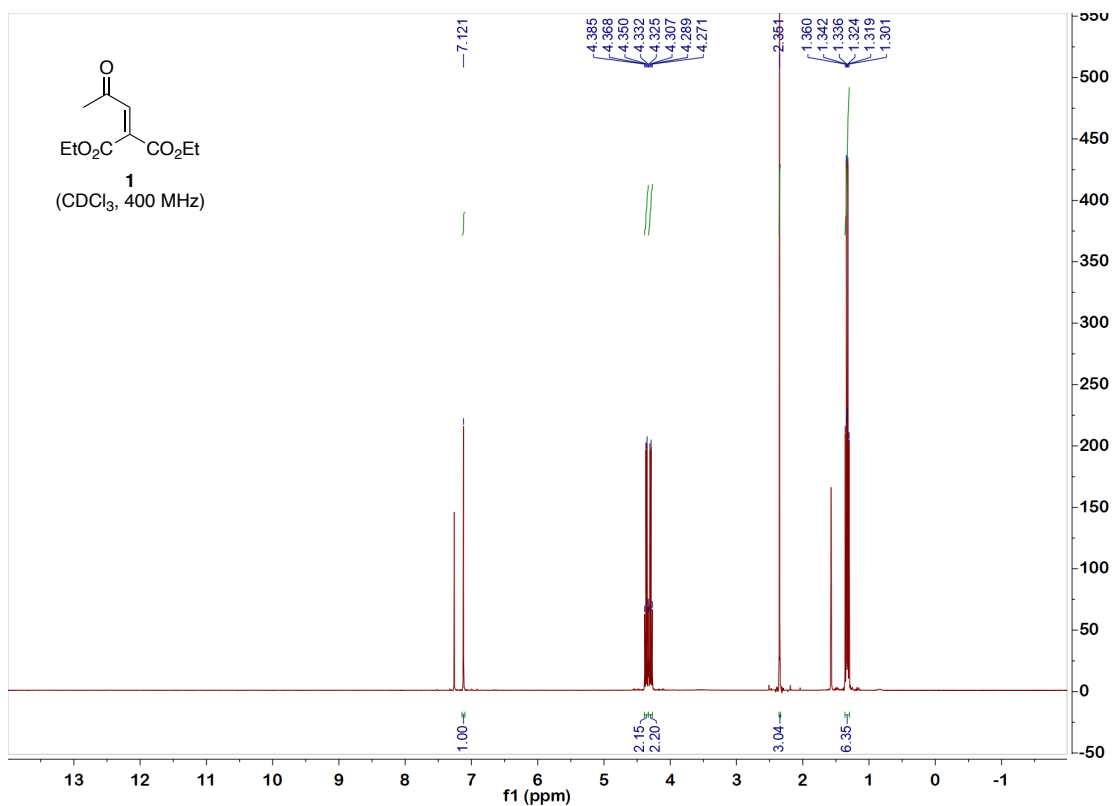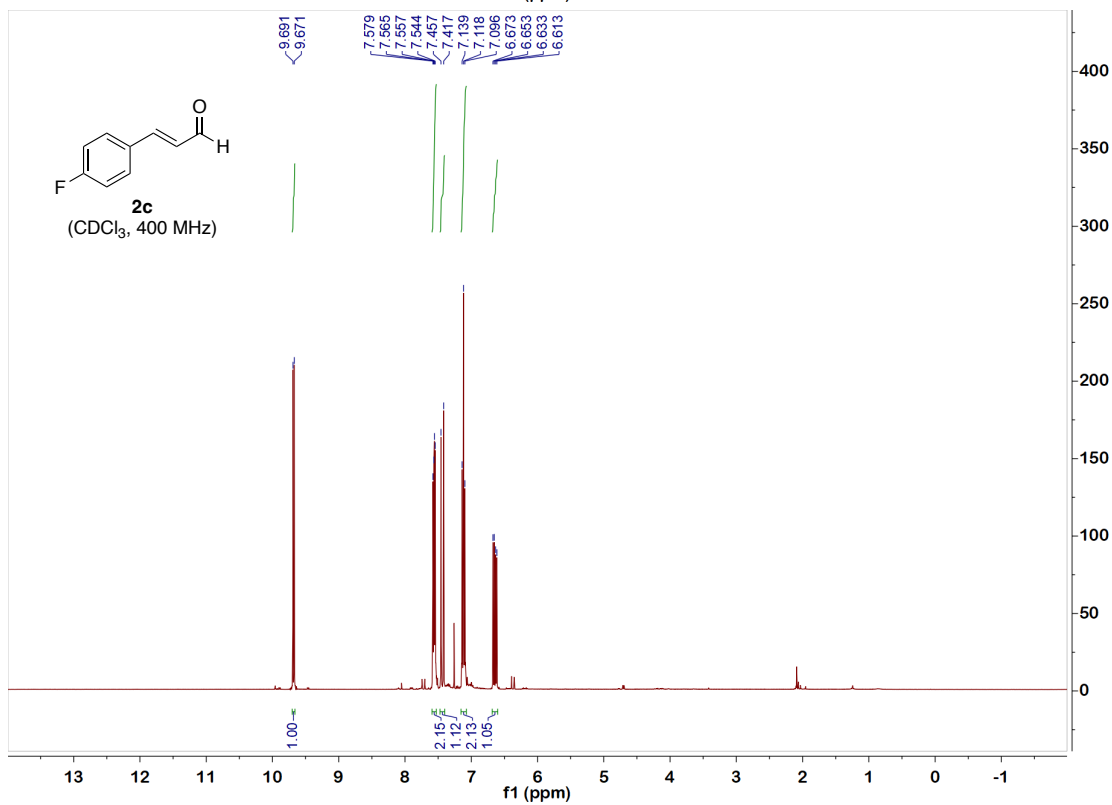

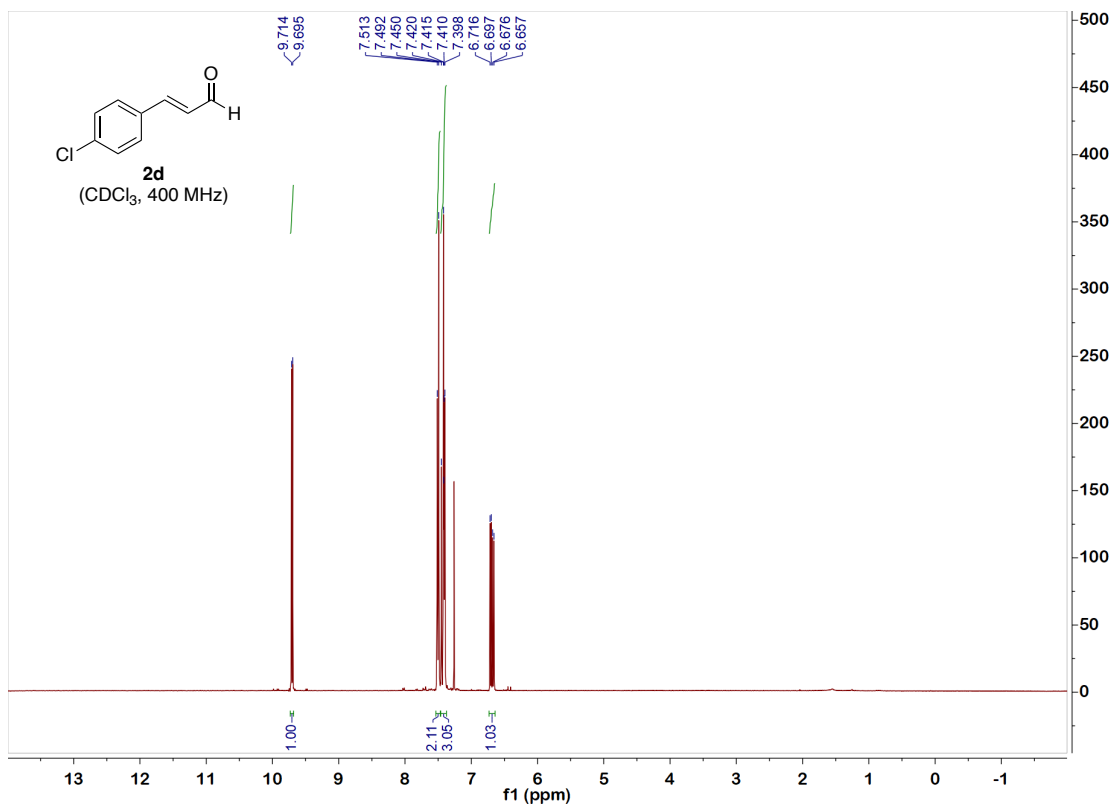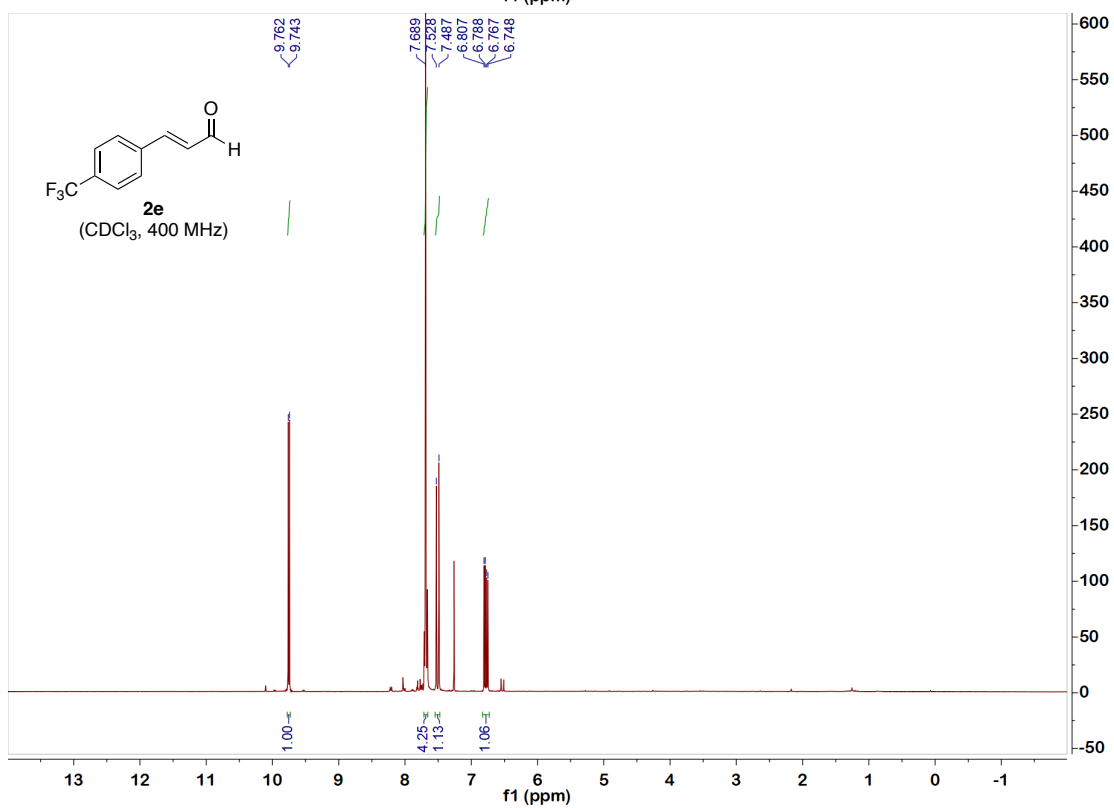



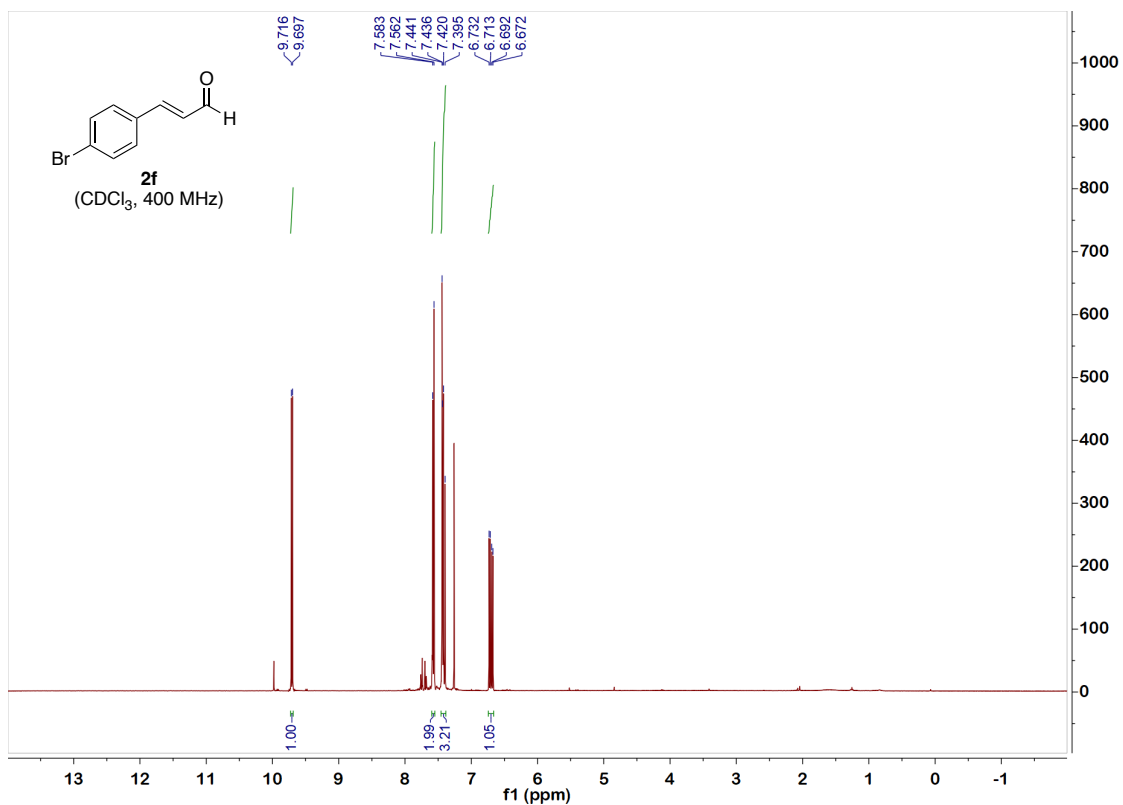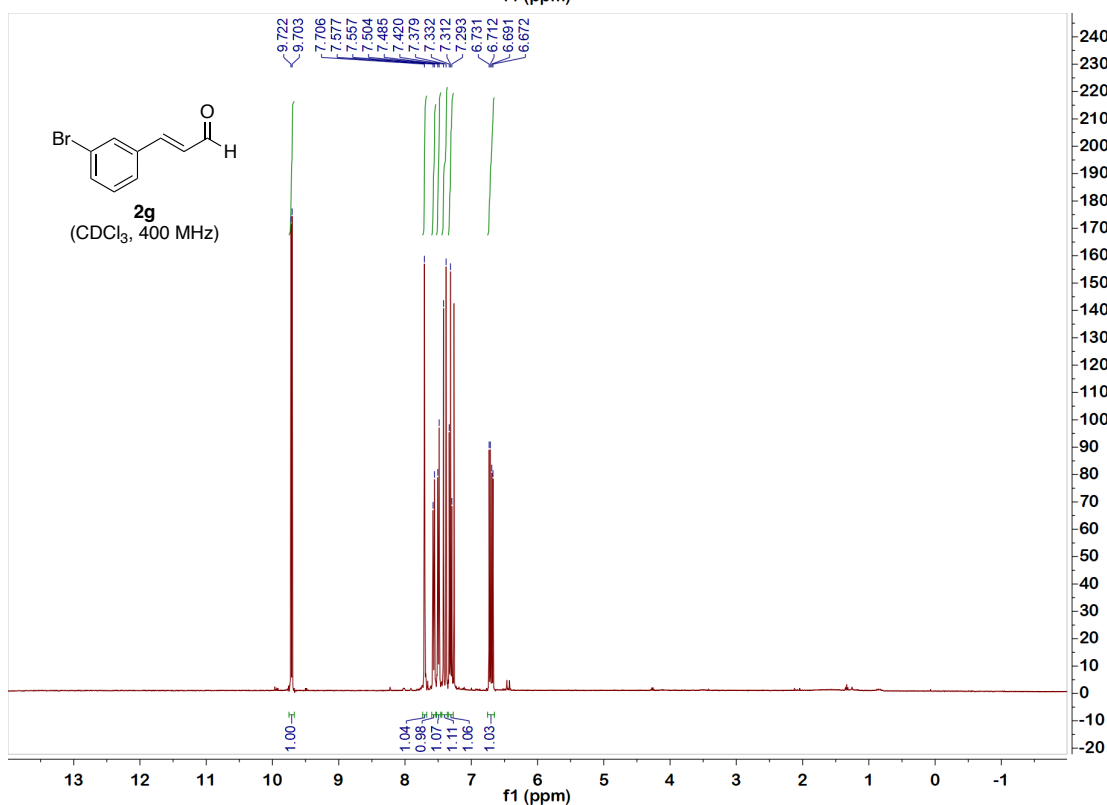

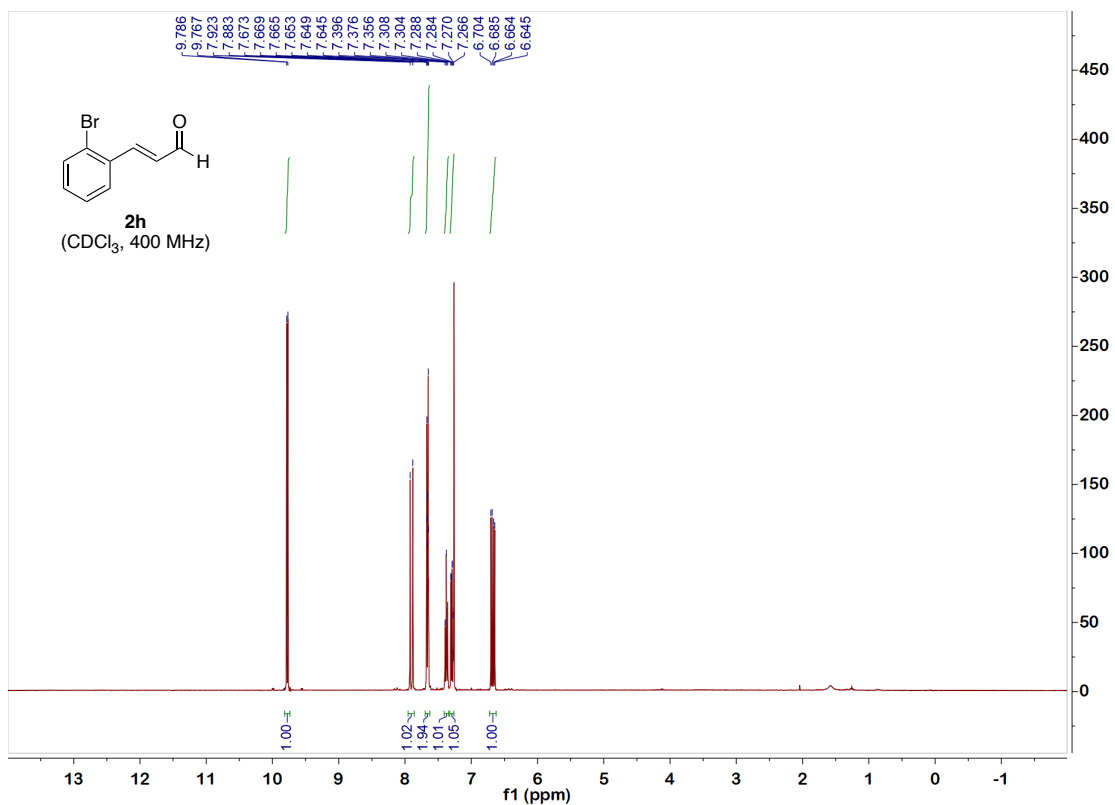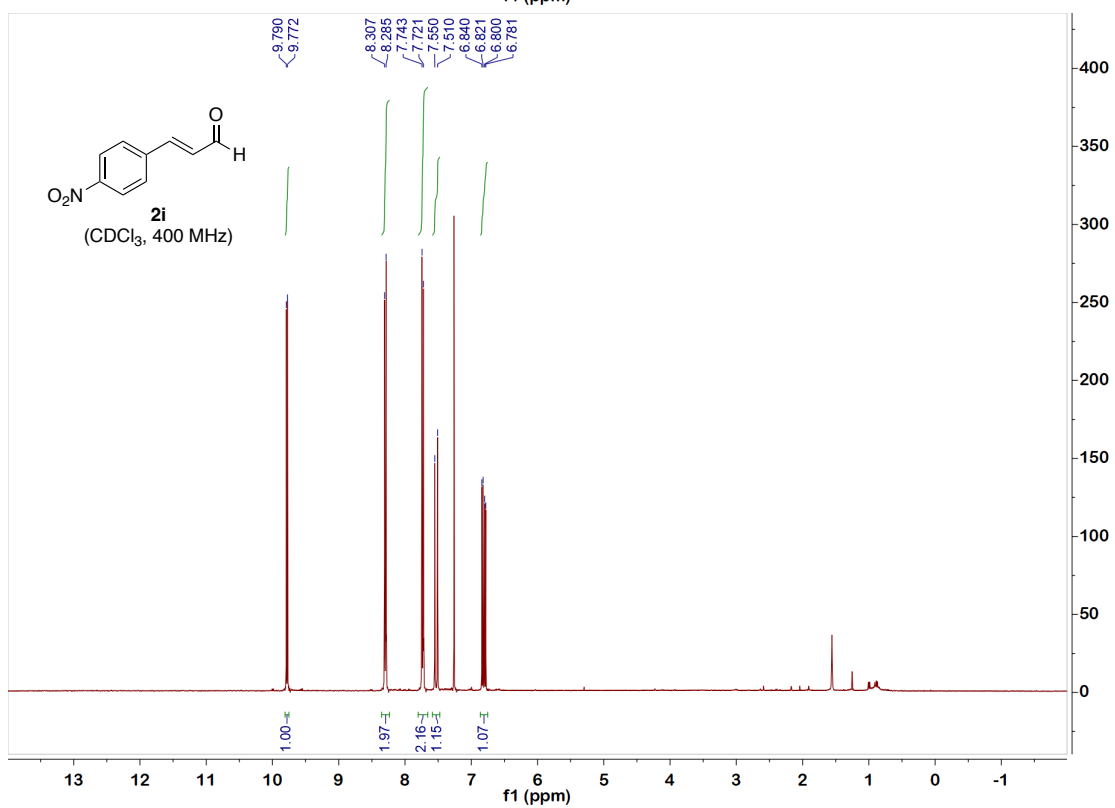

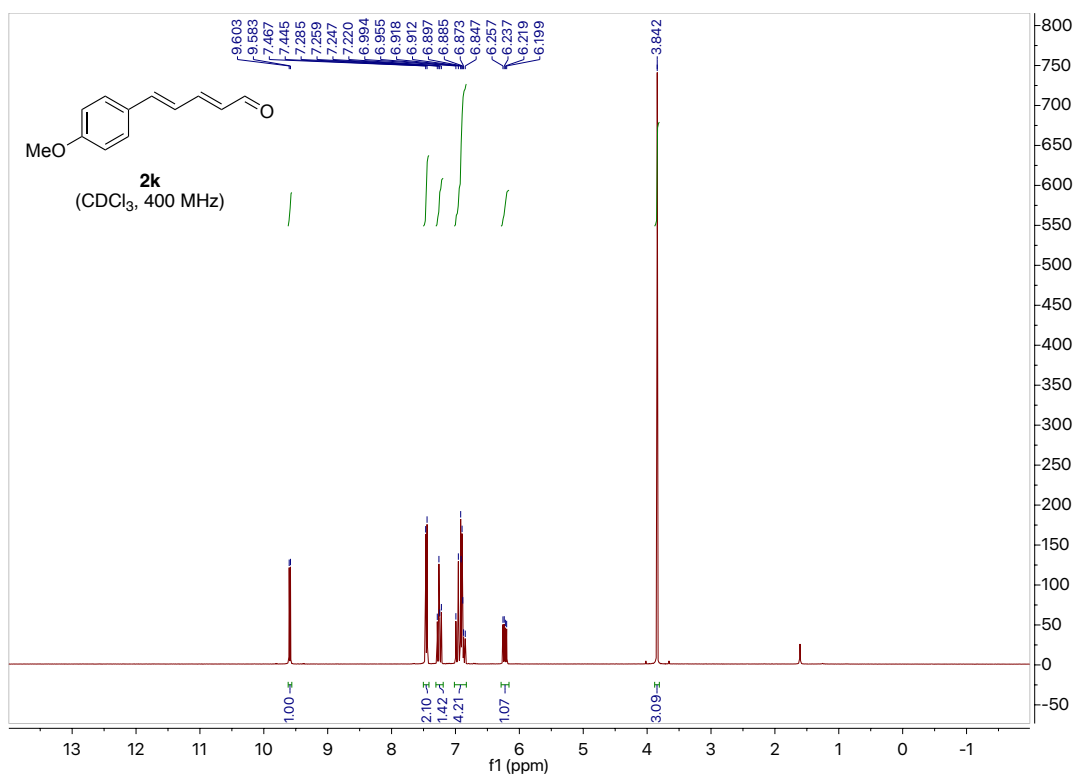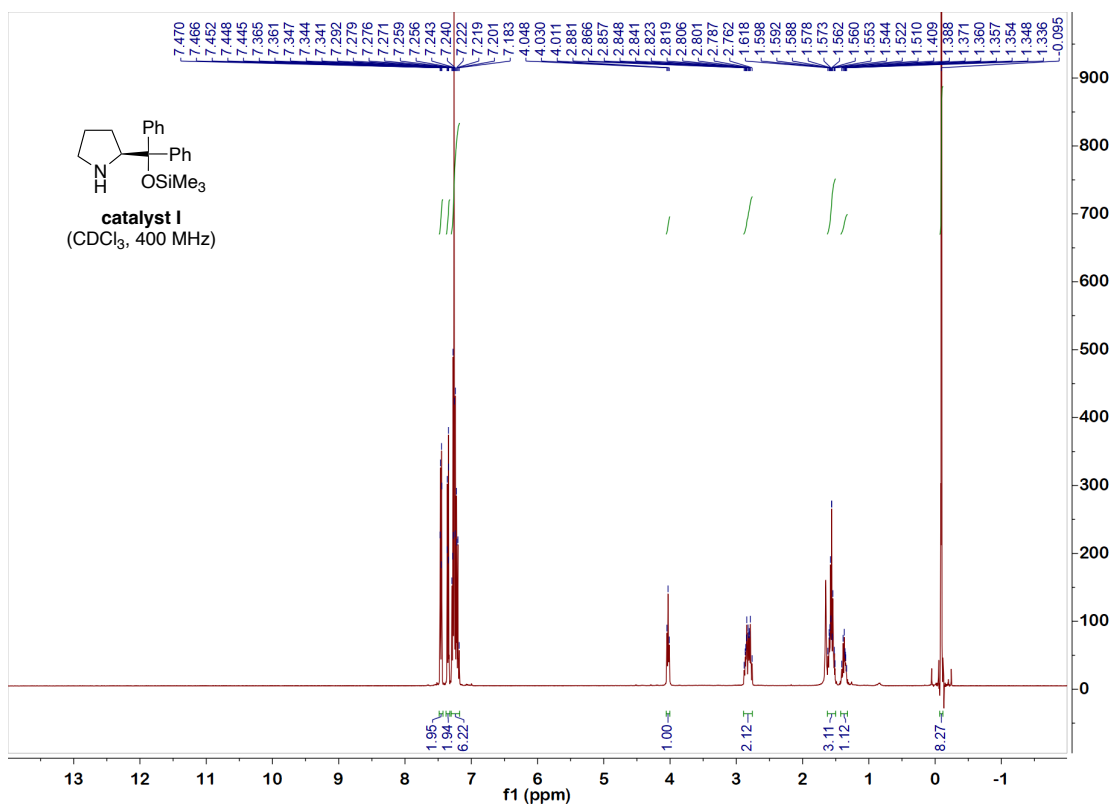

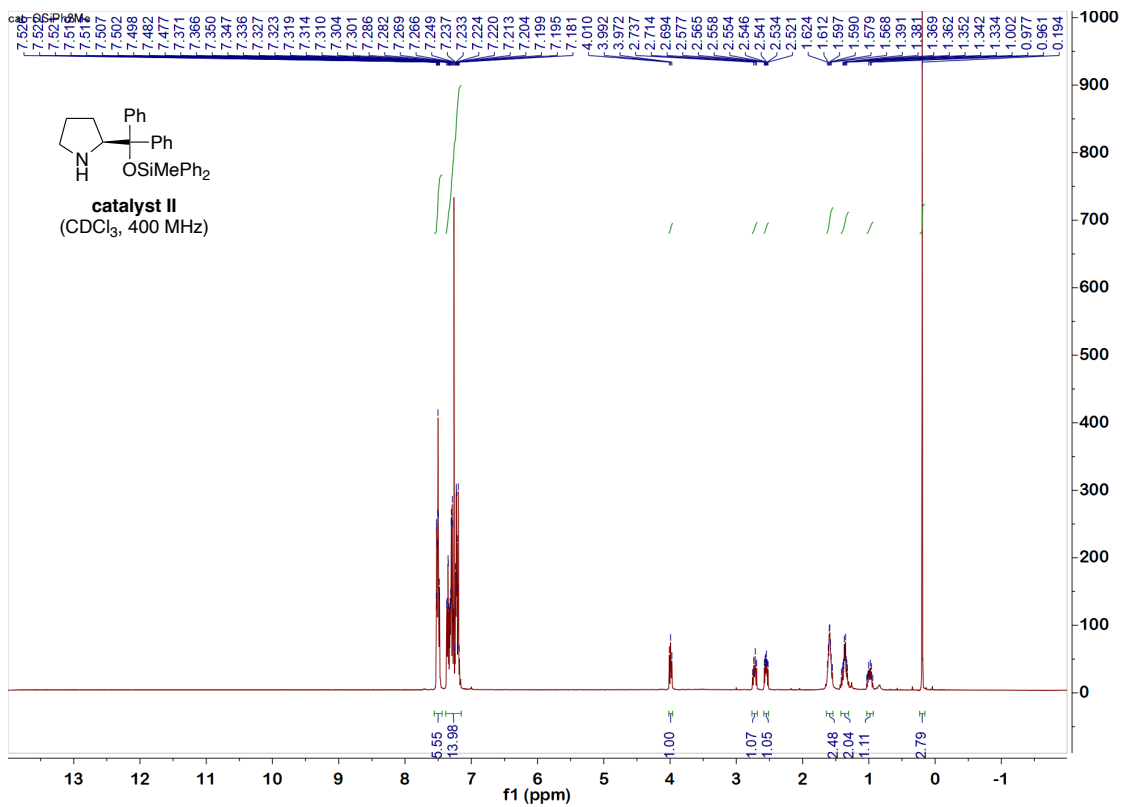

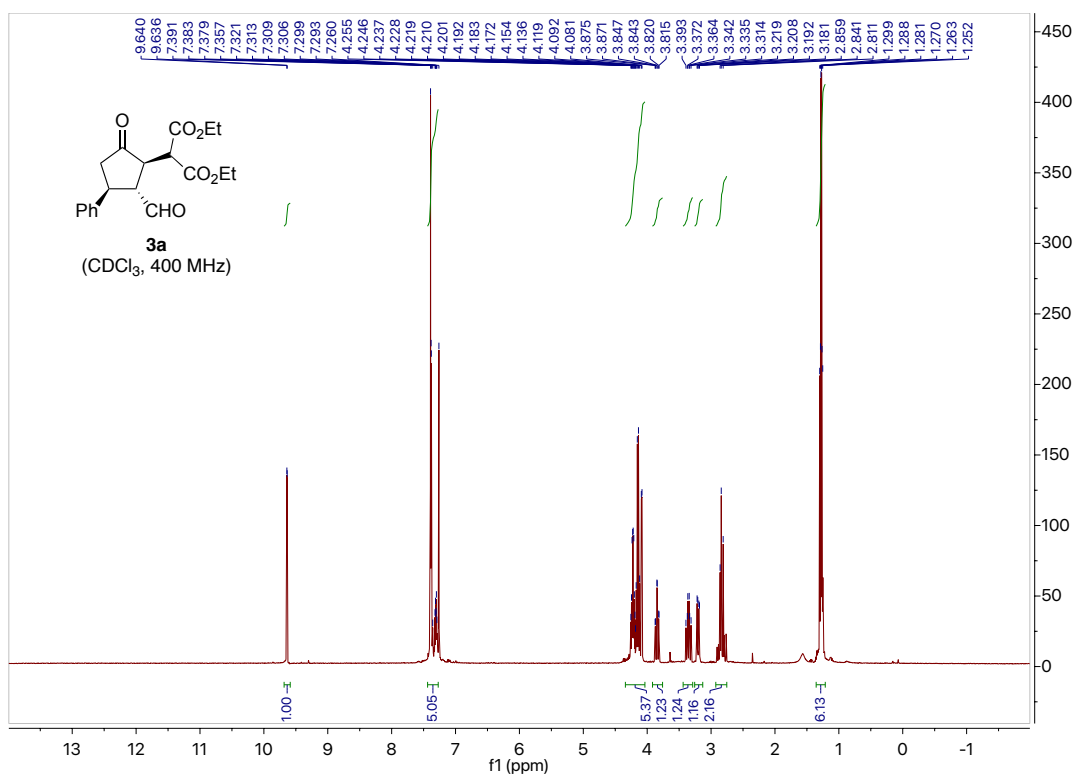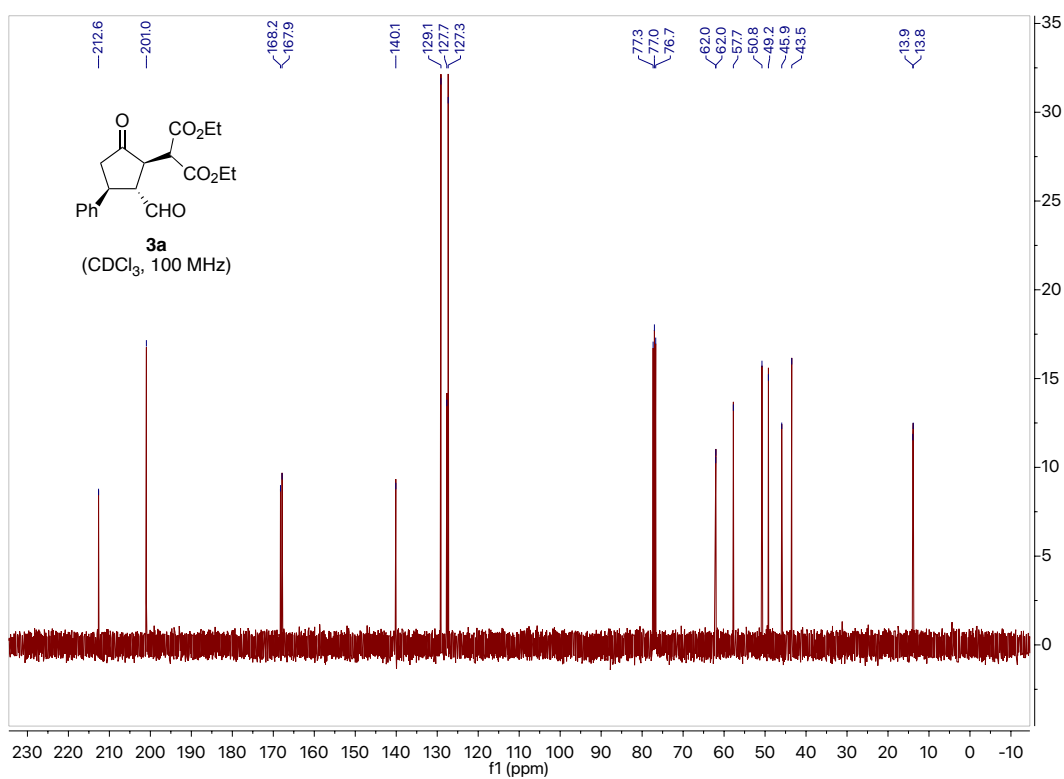

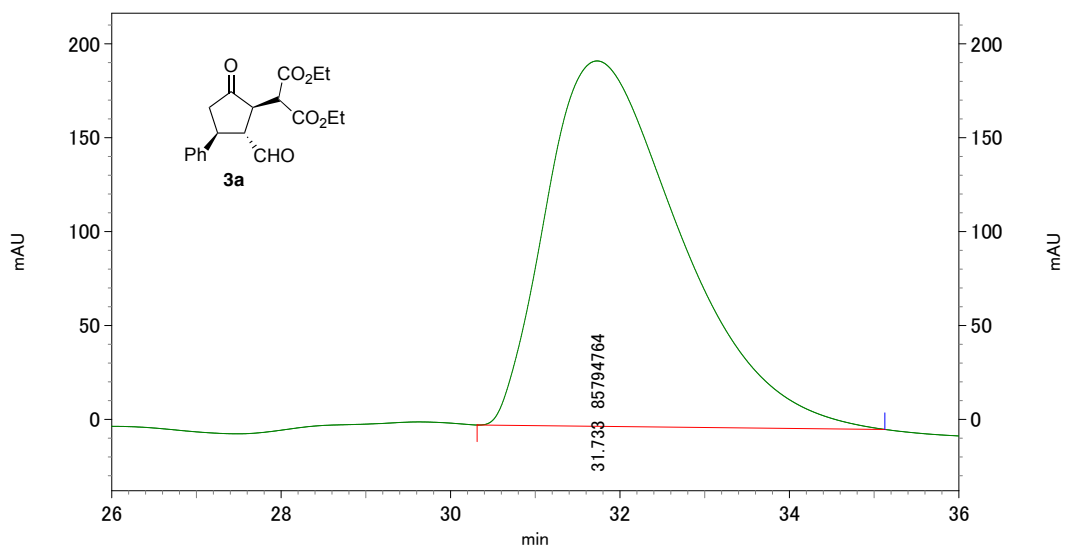

Result

1: 210.0 nm, 4.0 nm 結果

| Pk # | Retention time / min | Integration/ % |
|------|----------------------|----------------|
| 1    | 31.733               | 100.000        |

|       |  |         |
|-------|--|---------|
| 合計    |  | 100.000 |
| Total |  |         |

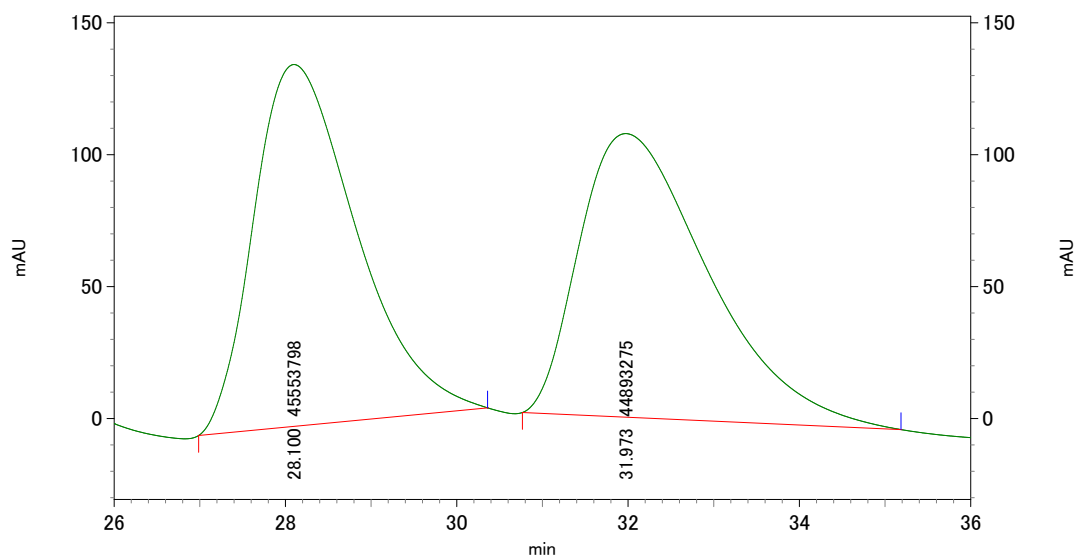

Result

1: 210.0 nm, 4.0 nm 結果

| Pk # | Retention time / min | Integration/ % |
|------|----------------------|----------------|
| 1    | 28.100               | 50.365         |
| 2    | 31.973               | 49.635         |

|       |  |         |
|-------|--|---------|
| 合計    |  | 100.000 |
| Total |  |         |

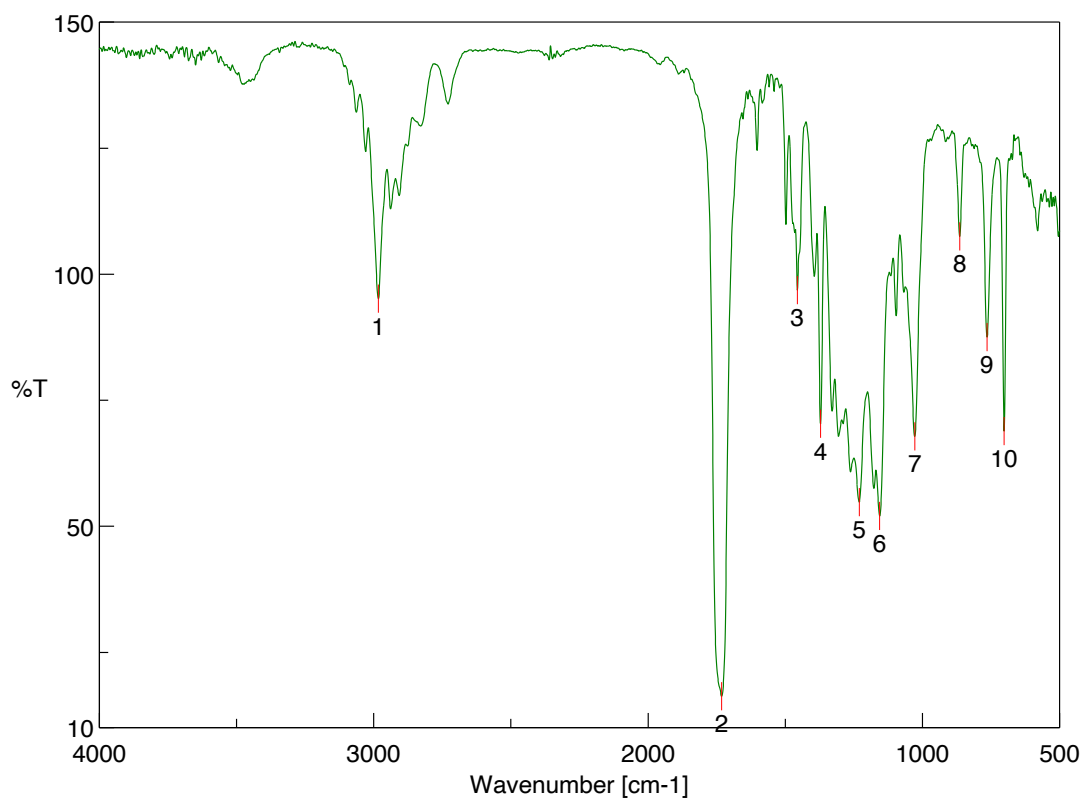

[ ピーク検出結果 ]

| No. | 位置      | 強度      | No. | 位置      | 強度      |
|-----|---------|---------|-----|---------|---------|
| 1   | 2983.34 | 95.1094 | 2   | 1731.76 | 16.2121 |
| 3   | 1455.99 | 96.8144 | 4   | 1371.14 | 70.307  |
| 5   | 1230.36 | 54.754  | 6   | 1156.12 | 52.0091 |
| 7   | 1027.87 | 67.8091 | 8   | 863.953 | 107.479 |
| 9   | 764.637 | 87.5083 | 10  | 701.962 | 68.8245 |

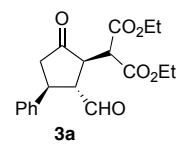

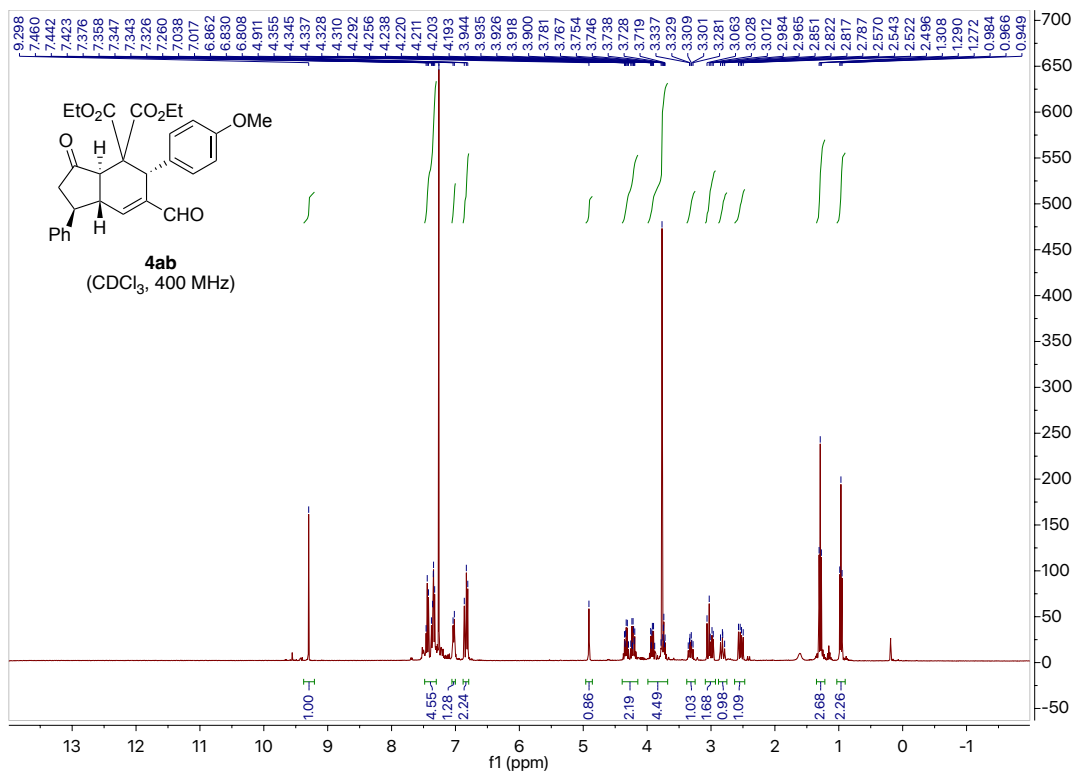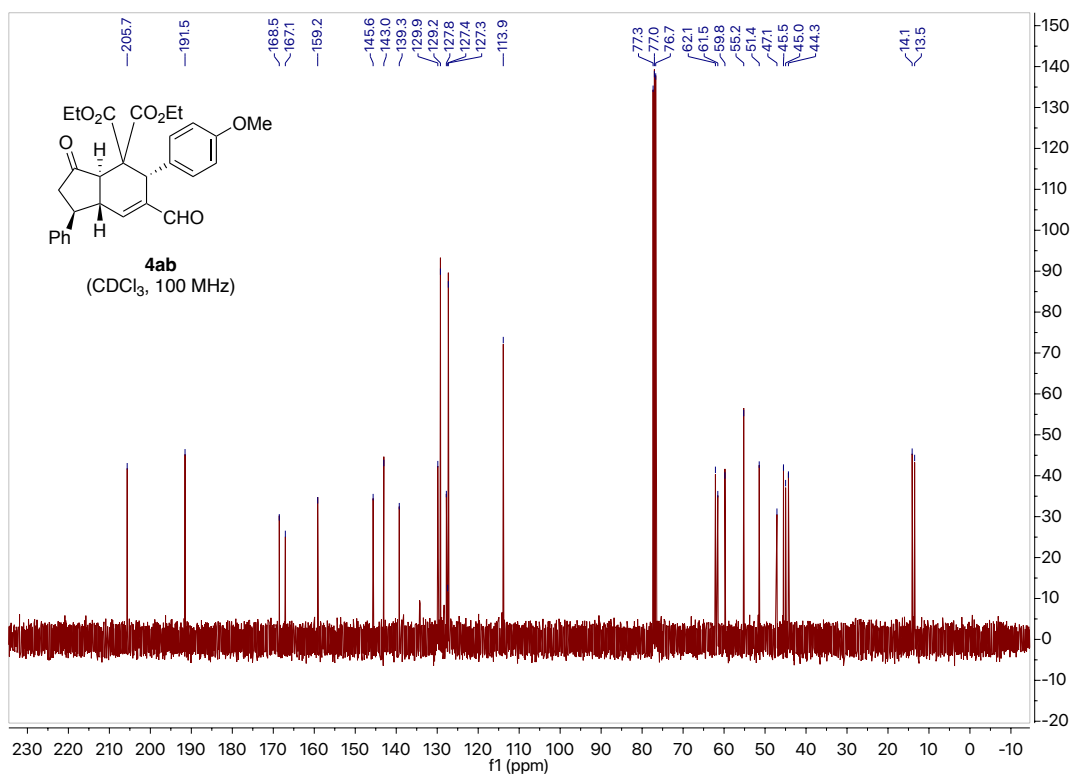



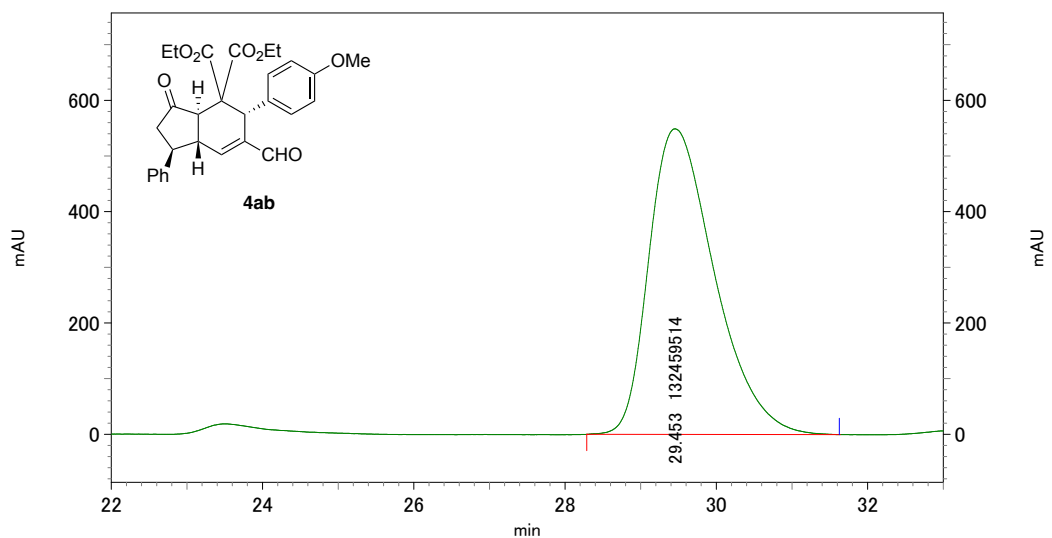

Result  
2: 208 nm, 4 nm結果

| Pk #  | Retention time / min | Integration / % |
|-------|----------------------|-----------------|
| 1     | 29.453               | 100.000         |
| トータル  |                      | 100.000         |
| Total |                      |                 |

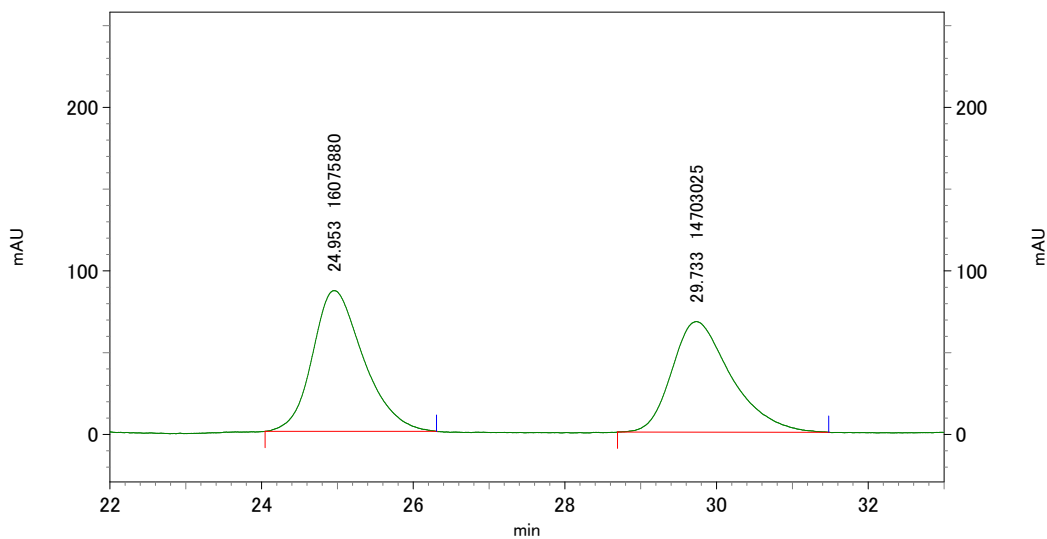

Result  
2: 208 nm, 4 nm結果

| Pk #  | Retention time / min | Integration / % |
|-------|----------------------|-----------------|
| 1     | 24.953               | 52.230          |
| 2     | 29.733               | 47.770          |
| トータル  |                      | 100.000         |
| Total |                      |                 |

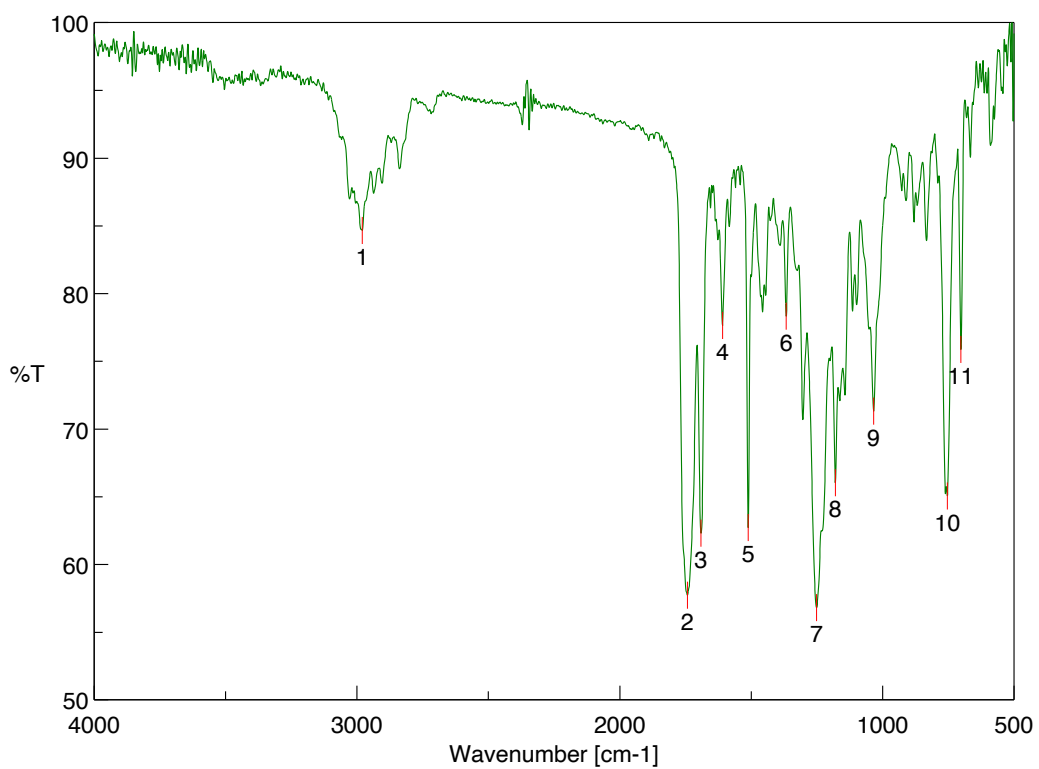

[ ピーク検出結果 ]

| No. | 位置      | 強度      | No. | 位置      | 強度      |
|-----|---------|---------|-----|---------|---------|
| 1   | 2979.48 | 84.6404 | 2   | 1742.37 | 57.7265 |
| 3   | 1691.27 | 62.3055 | 4   | 1609.31 | 77.6312 |
| 5   | 1510.95 | 62.7212 | 6   | 1367.28 | 78.3097 |
| 7   | 1251.58 | 56.8047 | 8   | 1179.26 | 66.0168 |
| 9   | 1033.66 | 71.3007 | 10  | 754.031 | 65.0532 |
| 11  | 701.962 | 75.8544 |     |         |         |

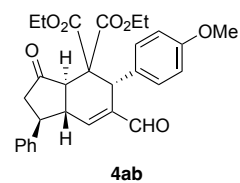

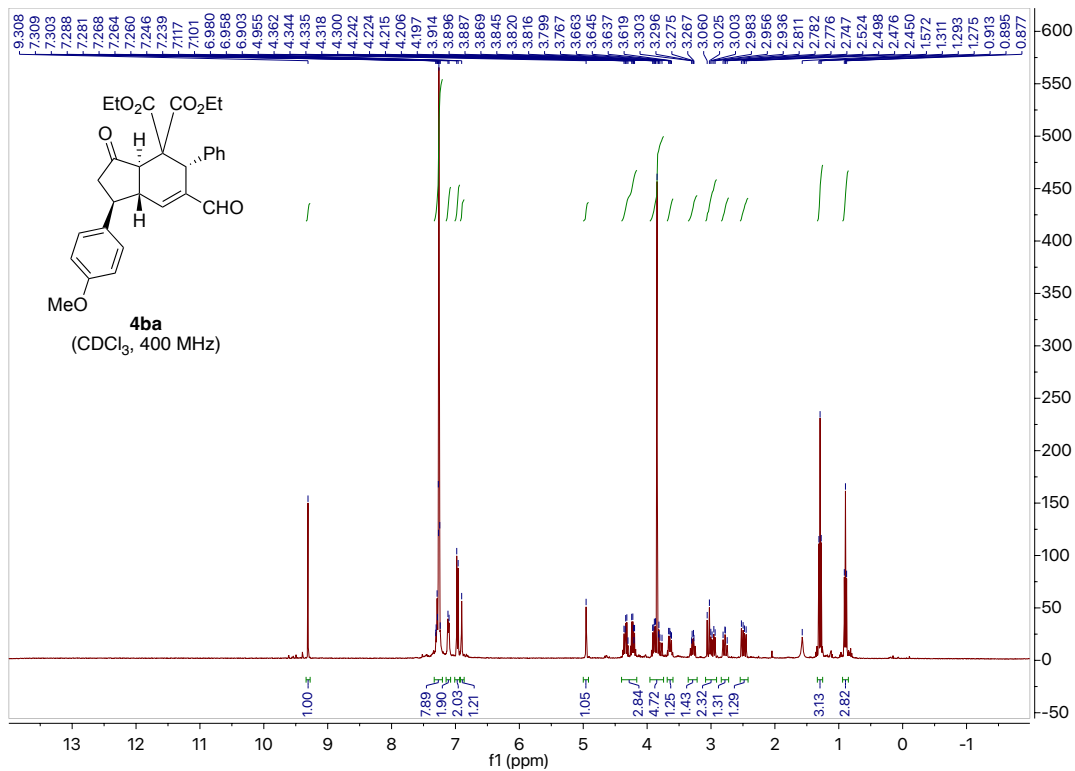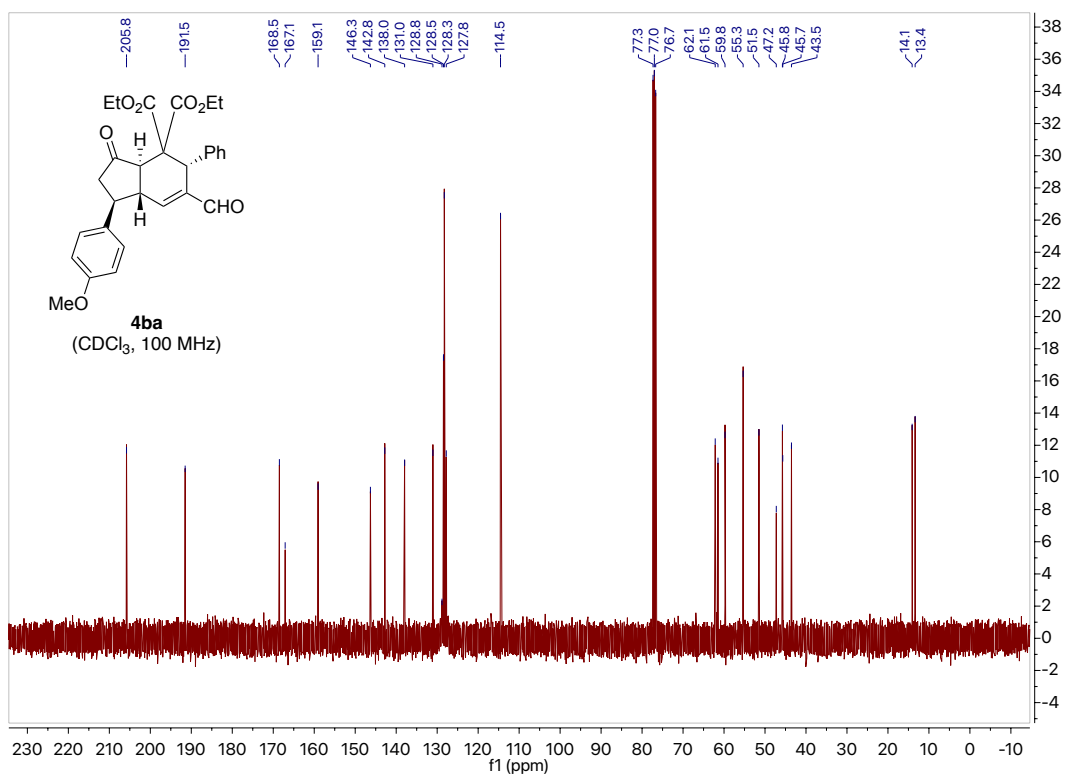

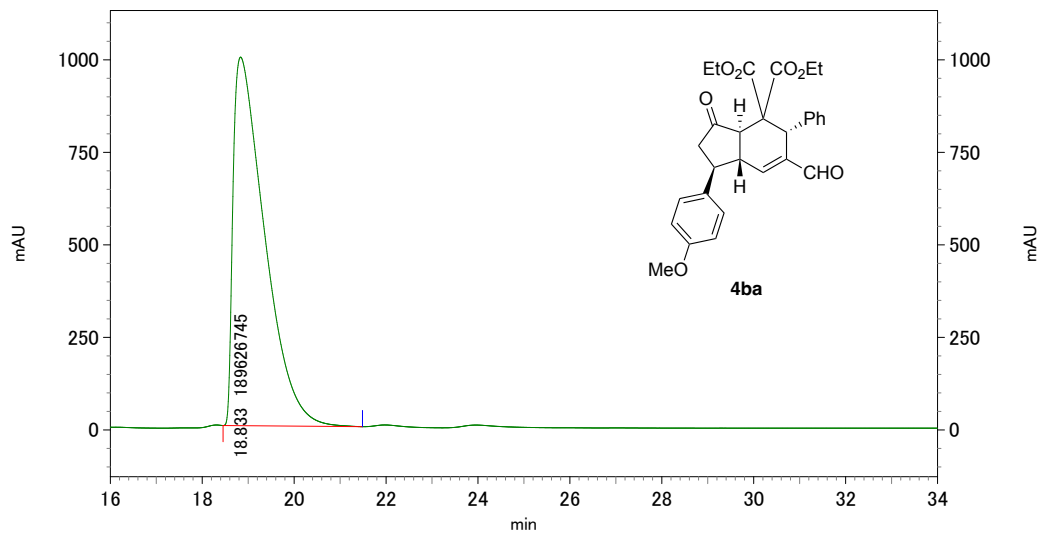

Result  
2: 208.0 nm, 4.0 nm 結果

| Pk # | Retention time / min | Integration/ % |
|------|----------------------|----------------|
| 1    | 18.833               | 99.999         |
| 2    | 59.513               | 0.000          |
| 3    | 59.733               | 0.000          |
| 4    | 59.847               | 0.000          |

|       |  |         |
|-------|--|---------|
| 合計    |  | 100.000 |
| Total |  |         |

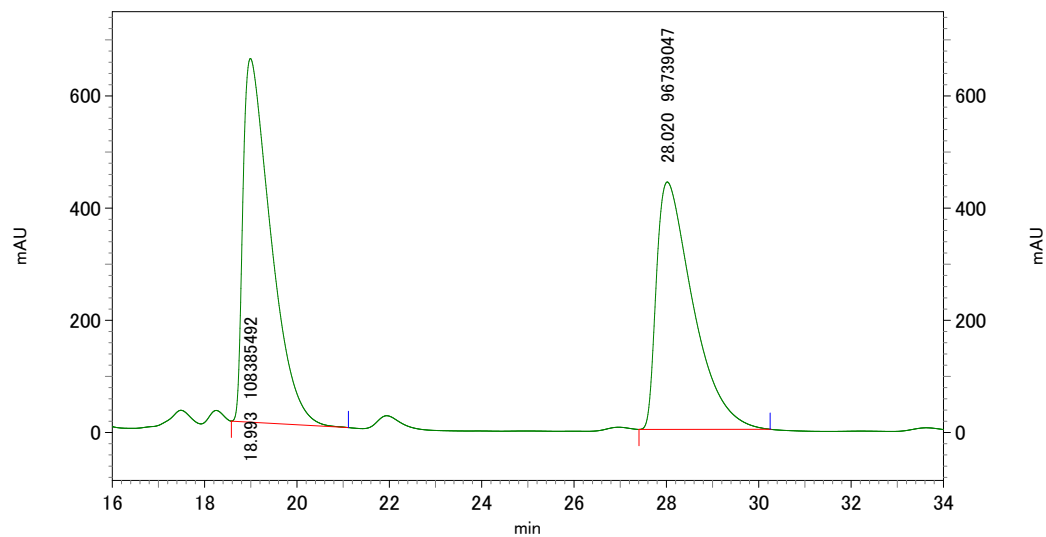

Result  
2: 208.0 nm, 4.0 nm 結果

| Pk # | Retention time / min | Integration/ % |
|------|----------------------|----------------|
| 1    | 18.993               | 52.839         |
| 2    | 28.020               | 47.161         |

|       |  |         |
|-------|--|---------|
| 合計    |  | 100.000 |
| Total |  |         |

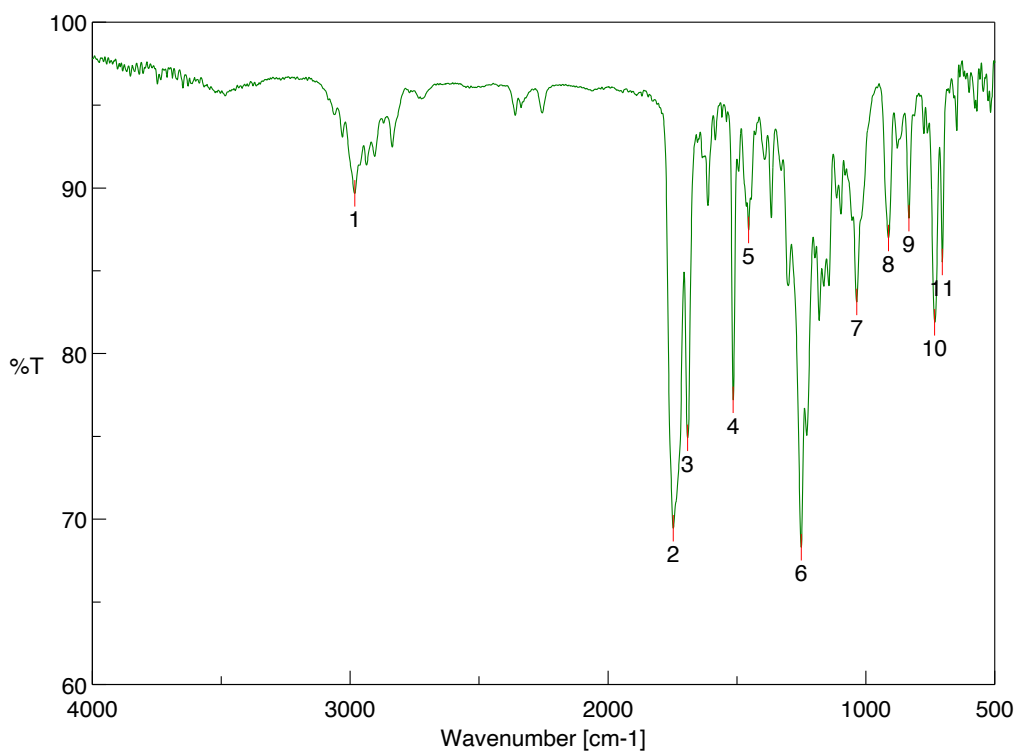

[ ピーク検出結果 ]

| No. | 位置      | 強度      | No. | 位置      | 強度      |
|-----|---------|---------|-----|---------|---------|
| 1   | 2982.37 | 89.6565 | 2   | 1747.19 | 69.4333 |
| 3   | 1691.27 | 74.9006 | 4   | 1514.81 | 77.1908 |
| 5   | 1455.03 | 87.4477 | 6   | 1250.61 | 68.286  |
| 7   | 1035.59 | 83.1125 | 8   | 912.165 | 86.9742 |
| 9   | 833.098 | 88.1666 | 10  | 732.817 | 81.876  |
| 11  | 702.926 | 85.5258 |     |         |         |

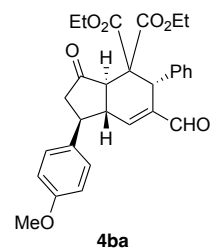

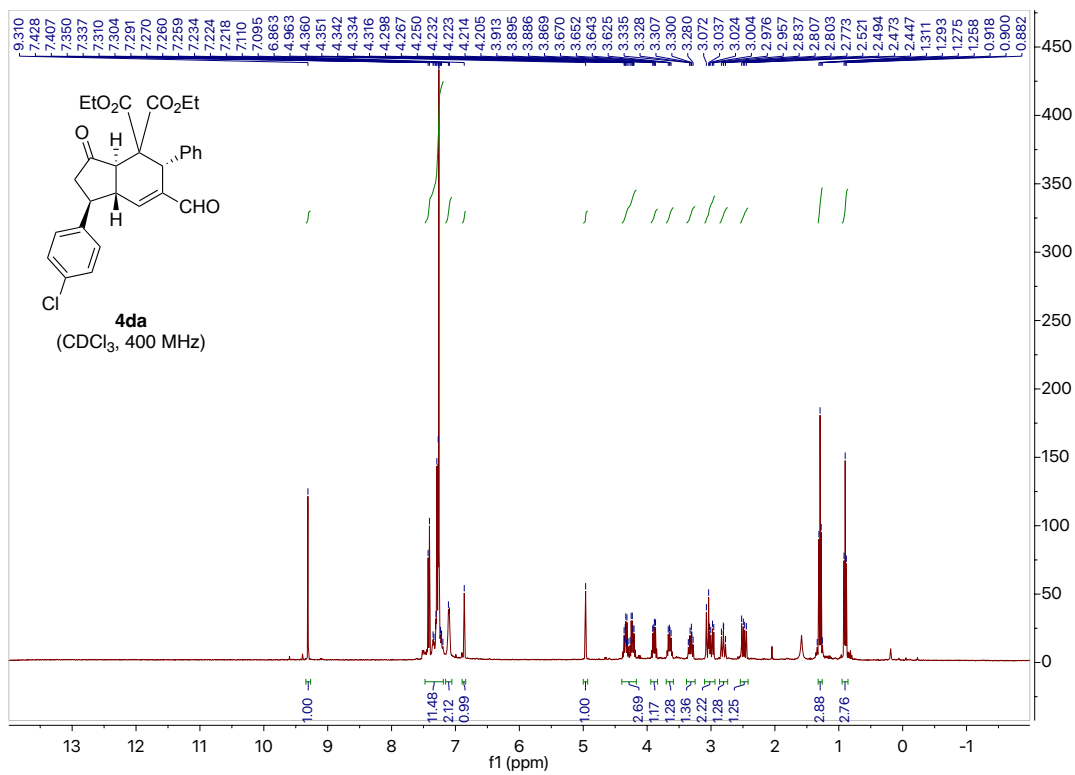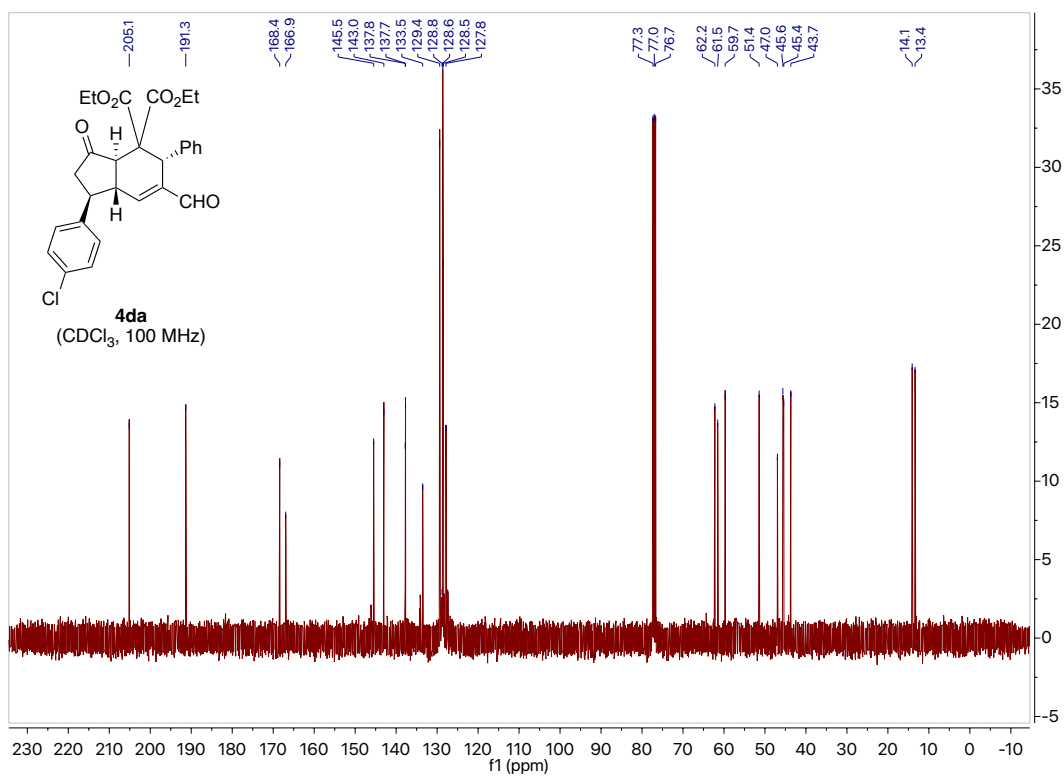

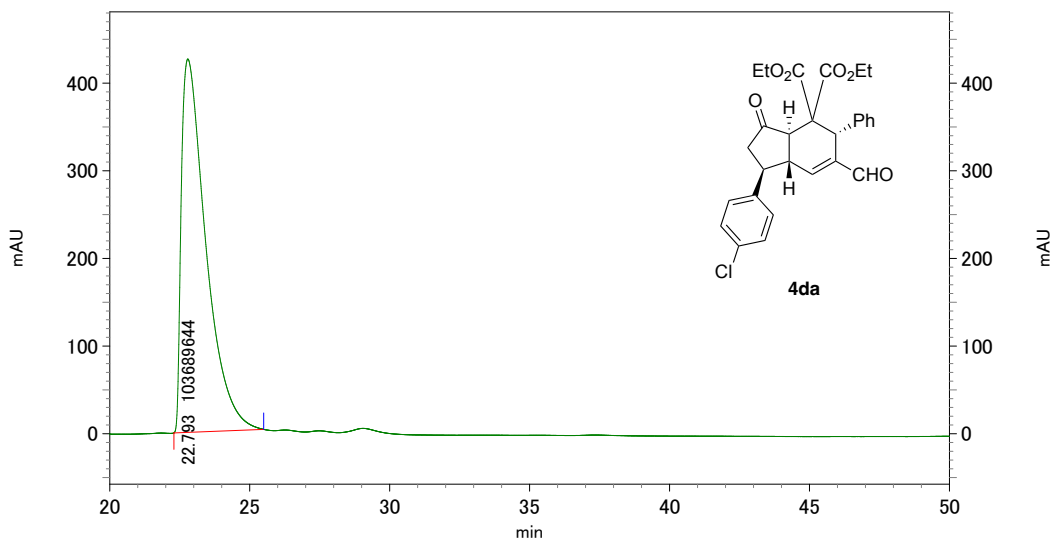

Result  
2: 208.0 nm, 4.0 nm 結果

| Pk #  | Retention time / min | Integration / % |
|-------|----------------------|-----------------|
| 1     | 22.793               | 100.000         |
| 合計    |                      | 100.000         |
| Total |                      |                 |

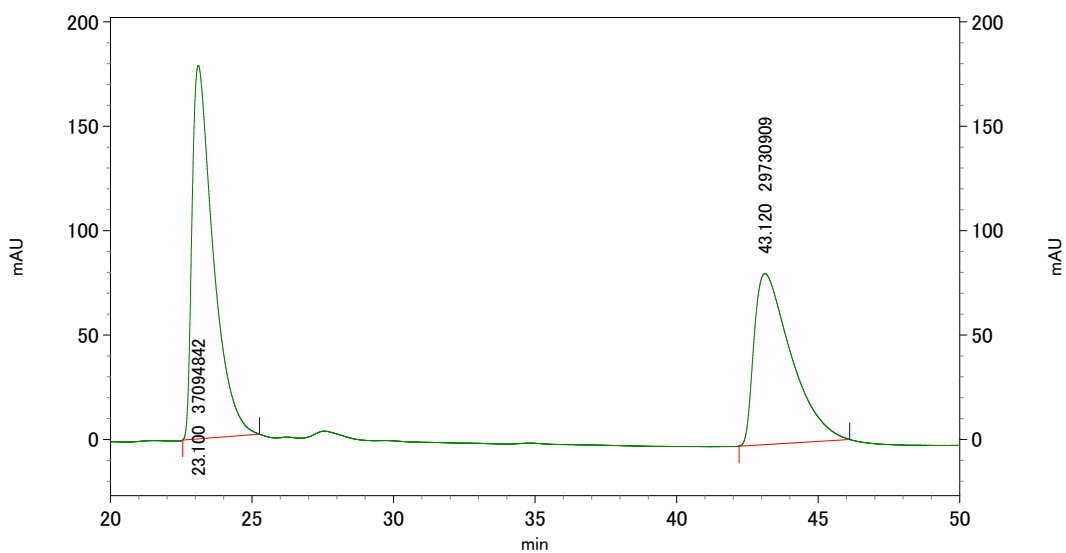

Result  
2: 208.0 nm, 4.0 nm 結果

| Pk #  | Retention time / min | Integration / % |
|-------|----------------------|-----------------|
| 1     | 23.100               | 55.510          |
| 2     | 43.120               | 44.490          |
| 合計    |                      | 100.000         |
| Total |                      |                 |

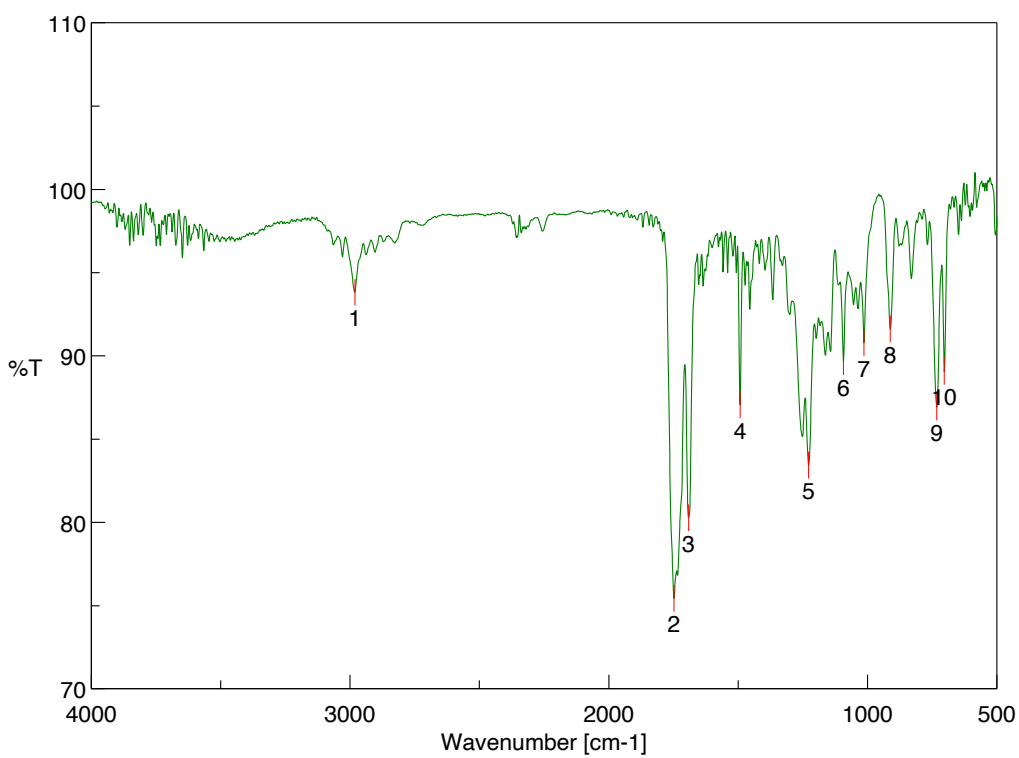

[ピーク検出結果]

| No. | 位置      | 強度      | No. | 位置      | 強度      |
|-----|---------|---------|-----|---------|---------|
| 1   | 2981.41 | 93.811  | 2   | 1748.16 | 75.4318 |
| 3   | 1691.27 | 80.2634 | 4   | 1492.63 | 87.0418 |
| 5   | 1227.47 | 83.4319 | 6   | 1092.48 | 89.6401 |
| 7   | 1013.41 | 90.7719 | 8   | 912.165 | 91.6095 |
| 9   | 731.853 | 86.92   | 10  | 702.926 | 89.0587 |

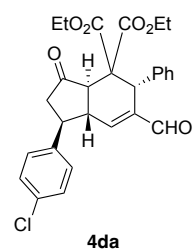



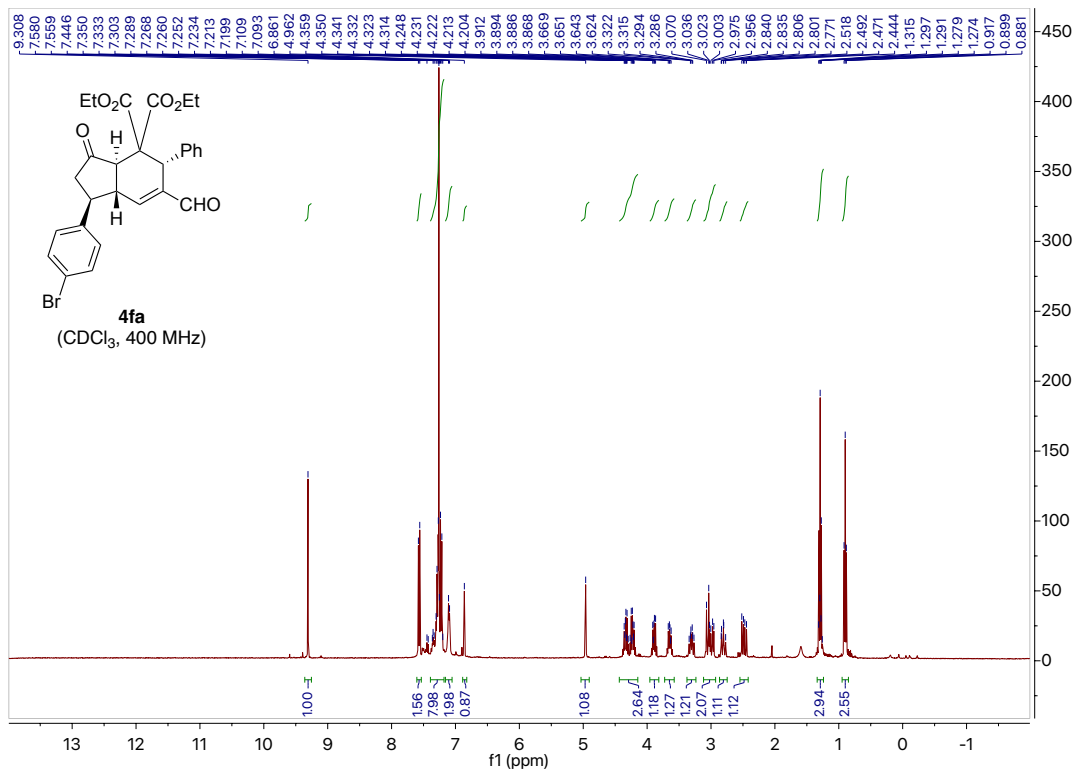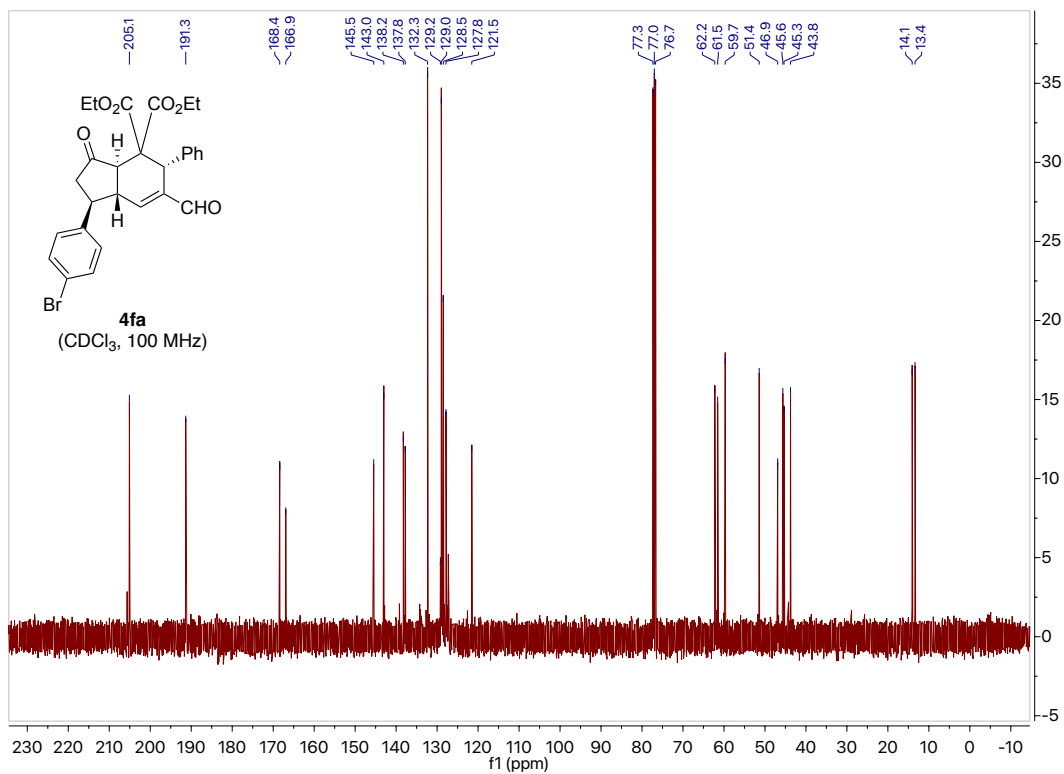

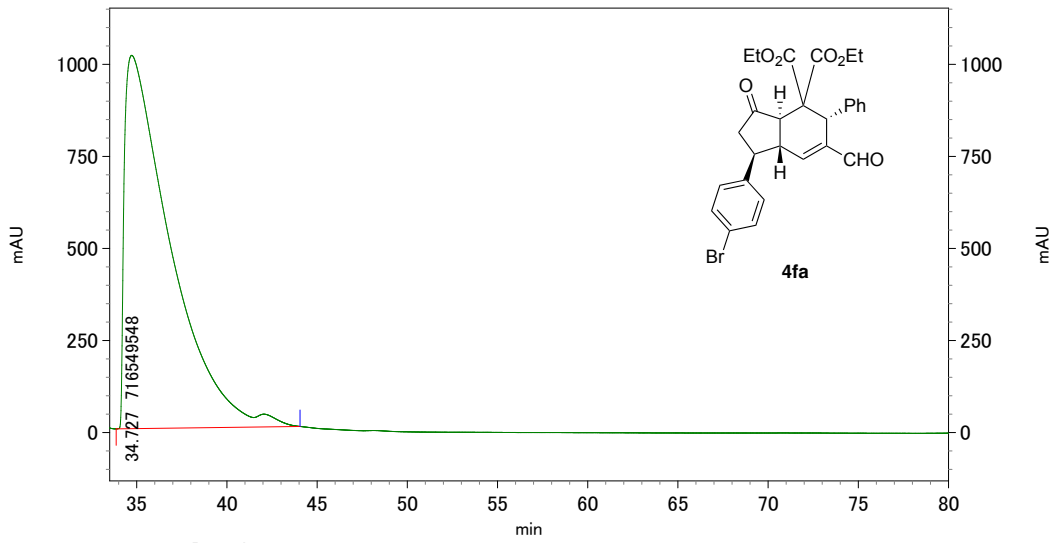

Result  
2: 208.0 nm, 4.0 nm 結果

| Pk #  | Retention time / min | Integration / % |
|-------|----------------------|-----------------|
| 1     | 34.727               | 100.000         |
| 合計    |                      | 100.000         |
| Total |                      | 100.000         |

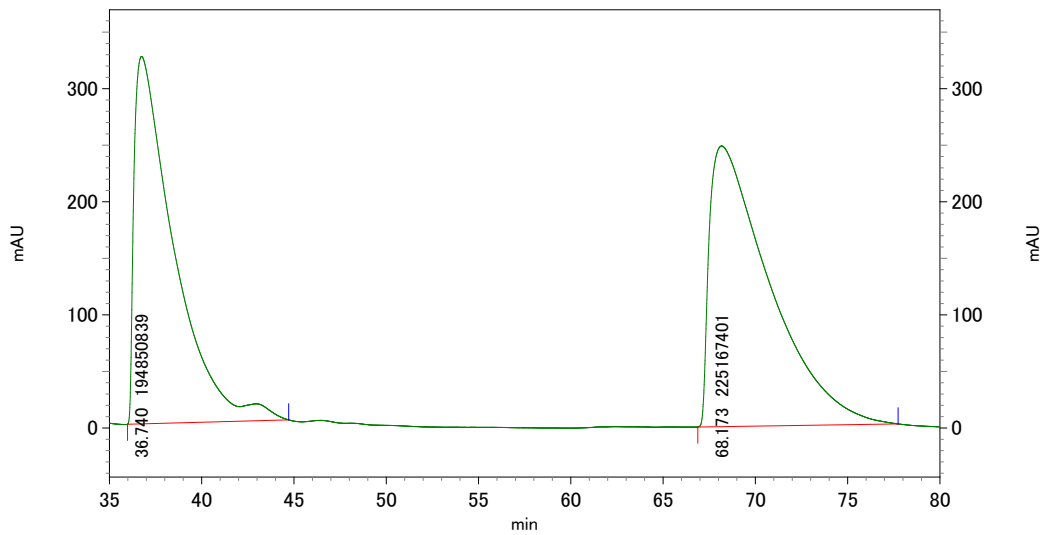

Result  
2: 208.0 nm, 4.0 nm 結果

| Pk #  | Retention time / min | Integration / % |
|-------|----------------------|-----------------|
| 1     | 36.740               | 46.391          |
| 2     | 68.173               | 53.609          |
| 合計    |                      | 100.000         |
| Total |                      | 100.000         |

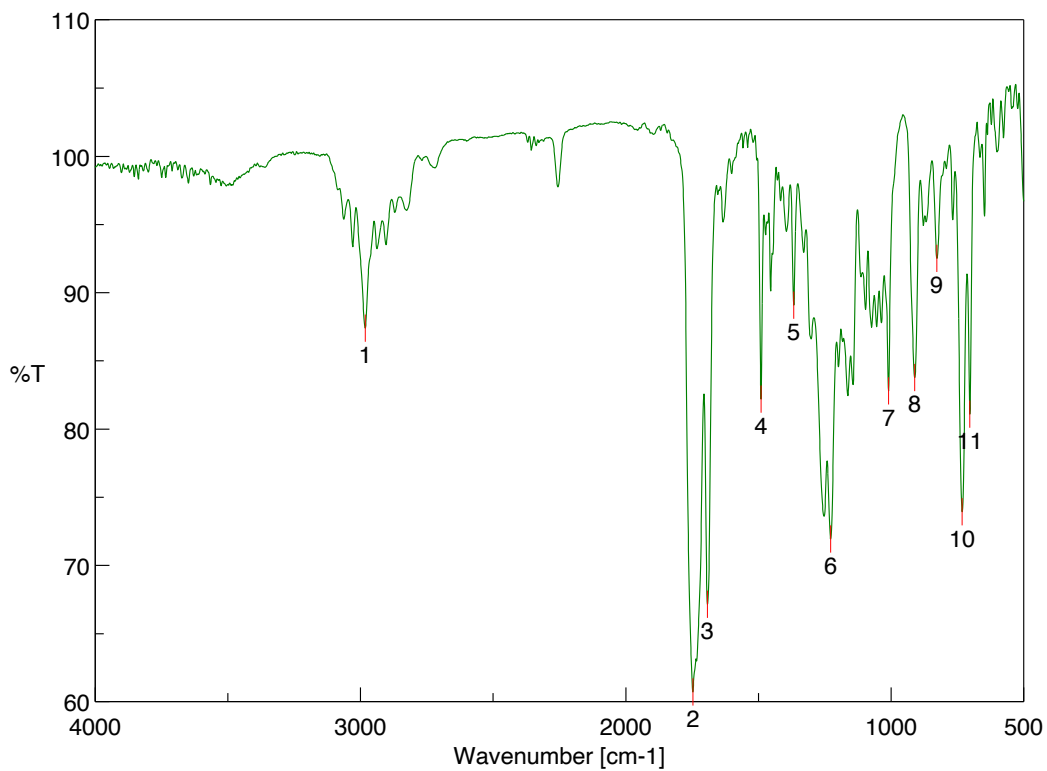

[ ピーク検出結果 ]

| No. | 位置      | 強度      | No. | 位置      | 強度      |
|-----|---------|---------|-----|---------|---------|
| 1   | 2982.37 | 87.3868 | 2   | 1747.19 | 60.7073 |
| 3   | 1692.23 | 67.1384 | 4   | 1489.74 | 82.1905 |
| 5   | 1367.28 | 89.0616 | 6   | 1227.47 | 71.9202 |
| 7   | 1009.55 | 82.7896 | 8   | 911.201 | 83.76   |
| 9   | 827.312 | 92.4941 | 10  | 731.853 | 73.9175 |
| 11  | 702.926 | 81.0776 |     |         |         |

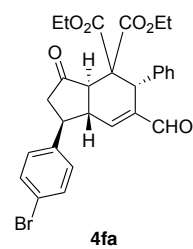

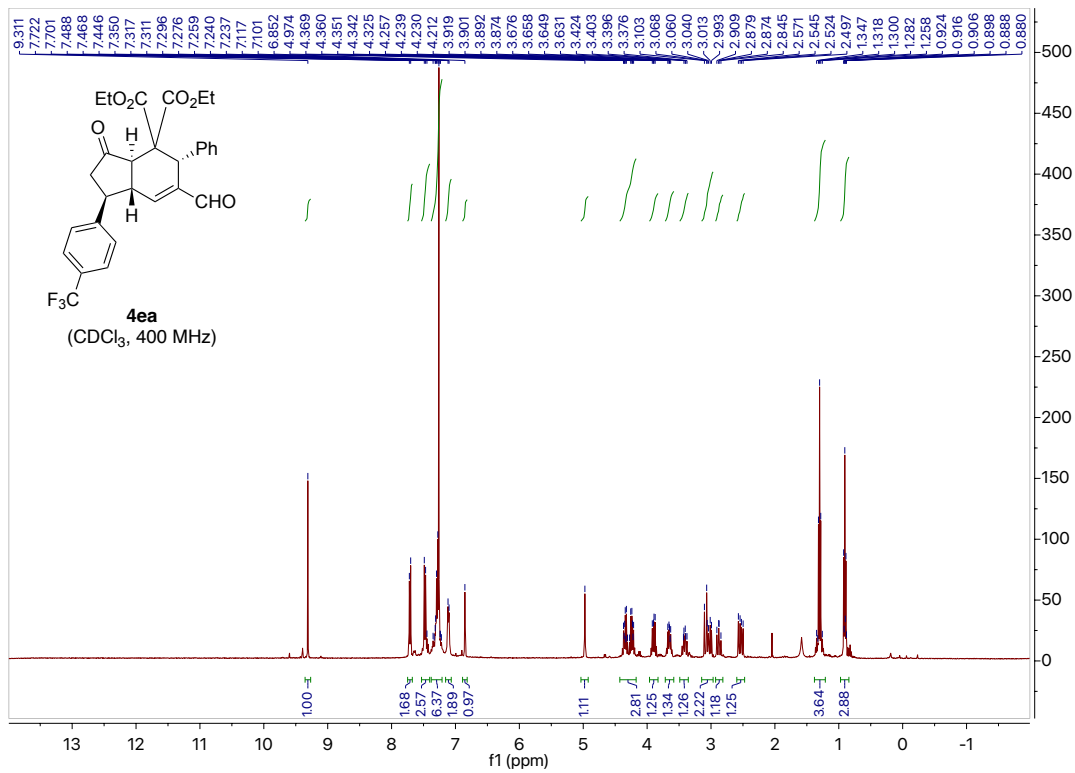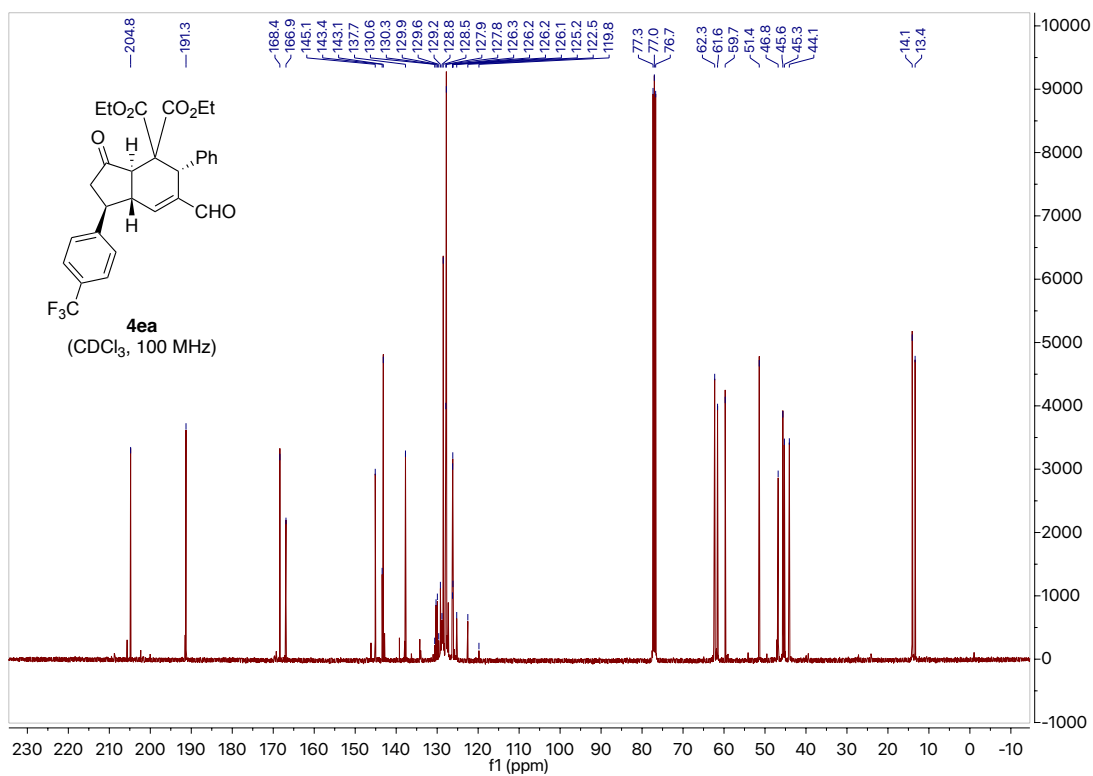

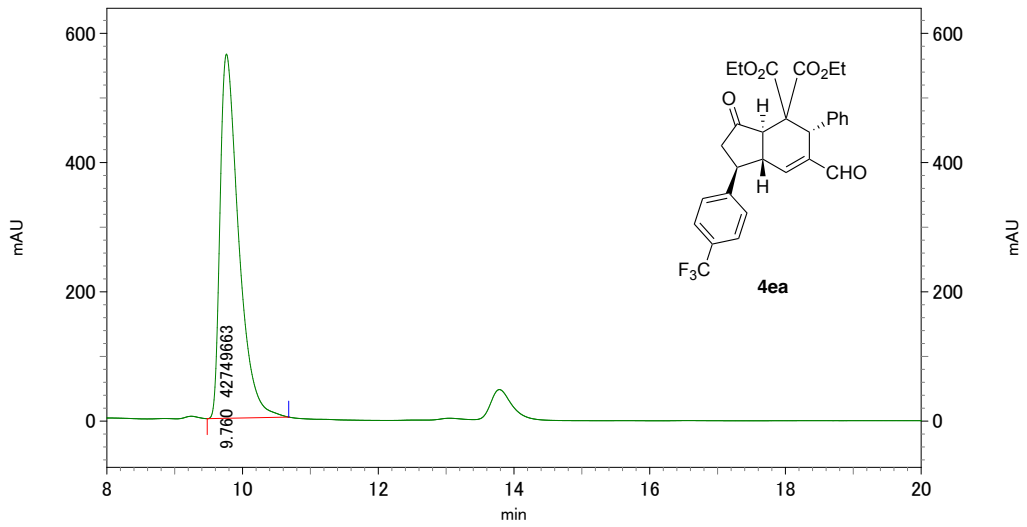

Result  
2: 208.0 nm, 4.0 nm 結果

| Pk #  | Retention time / min | Integration / % |
|-------|----------------------|-----------------|
| 1     | 9.760                | 100.000         |
| 合計    |                      | 100.000         |
| Total |                      |                 |

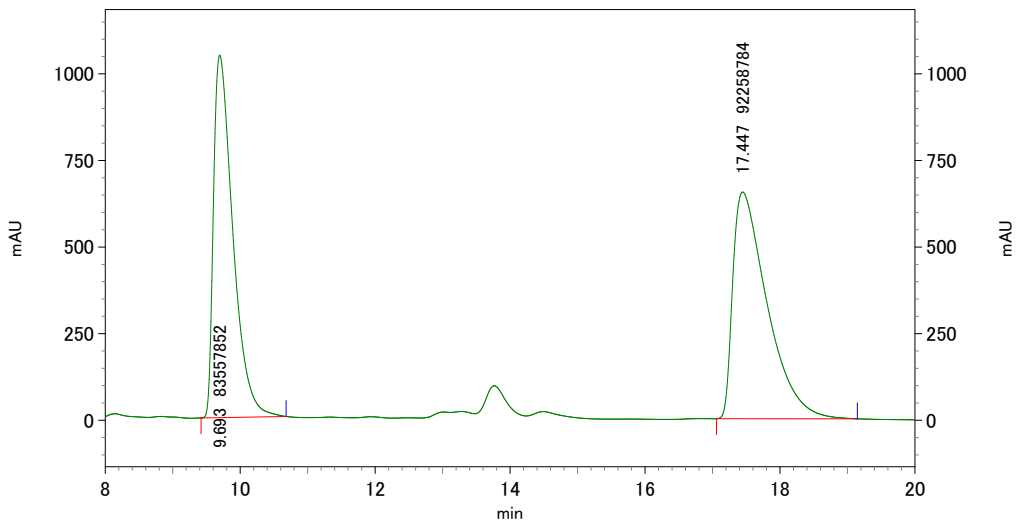

Result  
2: 208.0 nm, 4.0 nm 結果

| Pk #  | Retention time / min | Integration / % |
|-------|----------------------|-----------------|
| 1     | 9.693                | 47.526          |
| 2     | 17.447               | 52.474          |
| 合計    |                      | 100.000         |
| Total |                      |                 |

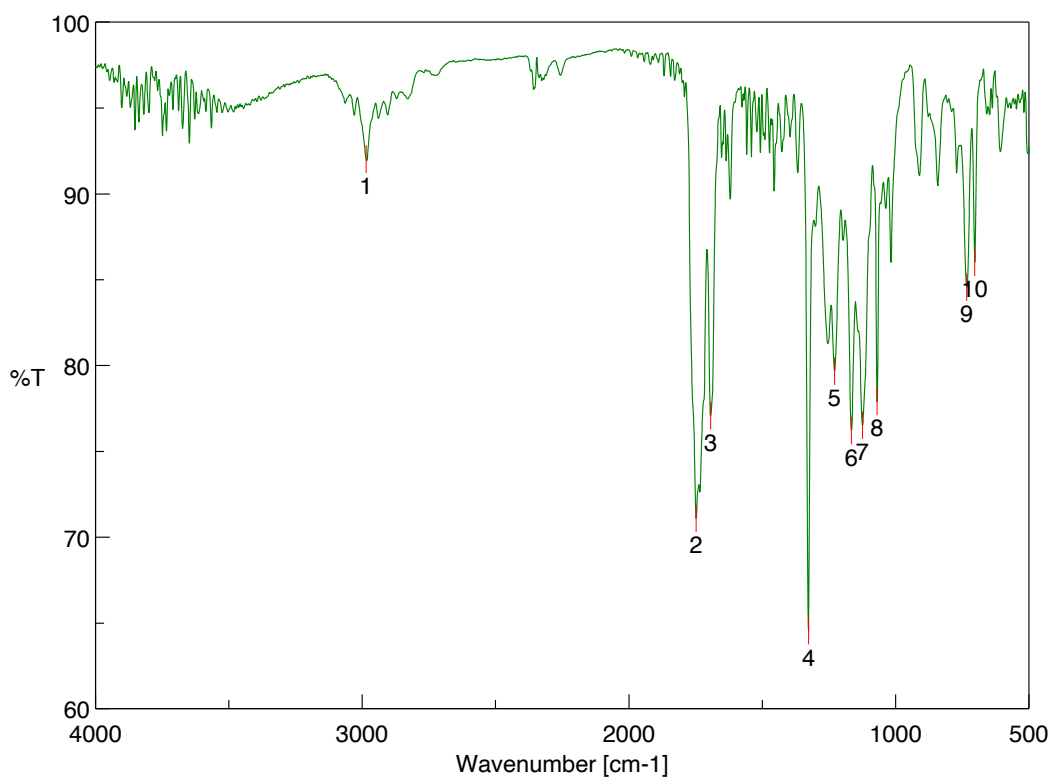

[ピーク検出結果]

| No. | 位置      | 強度      | No. | 位置      | 強度      |
|-----|---------|---------|-----|---------|---------|
| 1   | 2985.27 | 92.0077 | 2   | 1748.16 | 71.0815 |
| 3   | 1693.19 | 77.0557 | 4   | 1326.79 | 64.5447 |
| 5   | 1228.43 | 79.6575 | 6   | 1165.76 | 76.194  |
| 7   | 1124.3  | 76.5139 | 8   | 1069.33 | 77.8933 |
| 9   | 732.817 | 84.5525 | 10  | 702.926 | 86.009  |

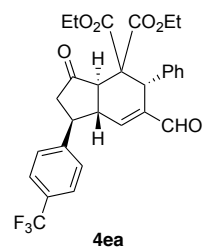

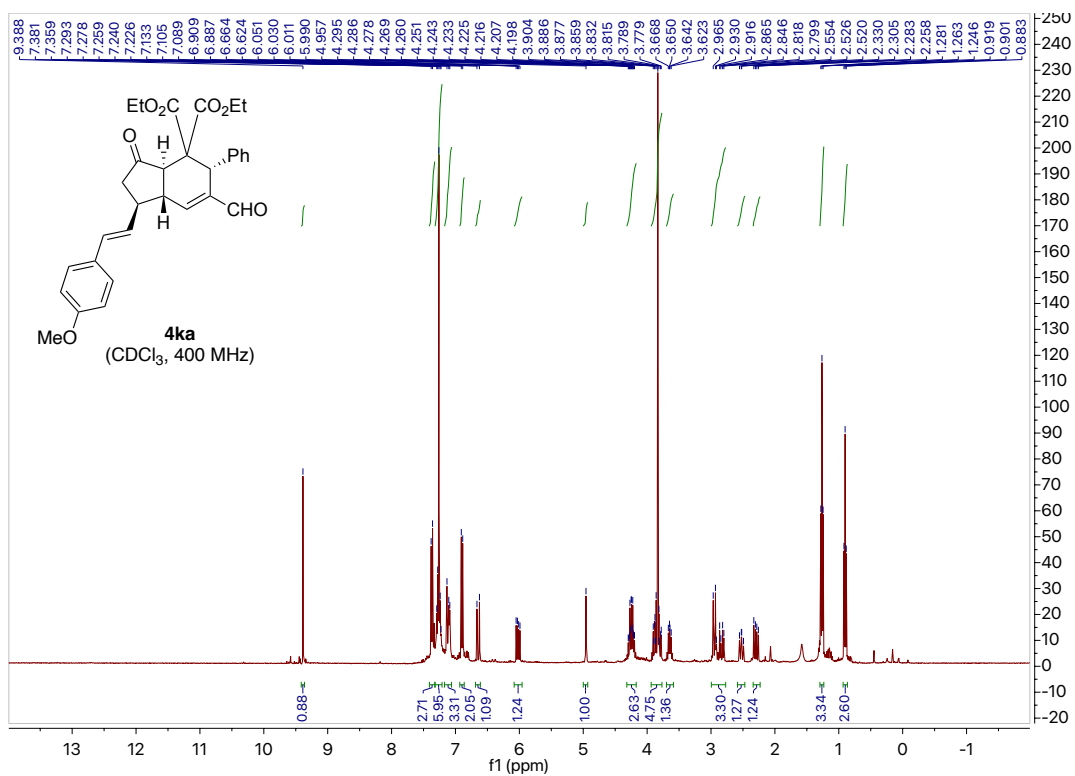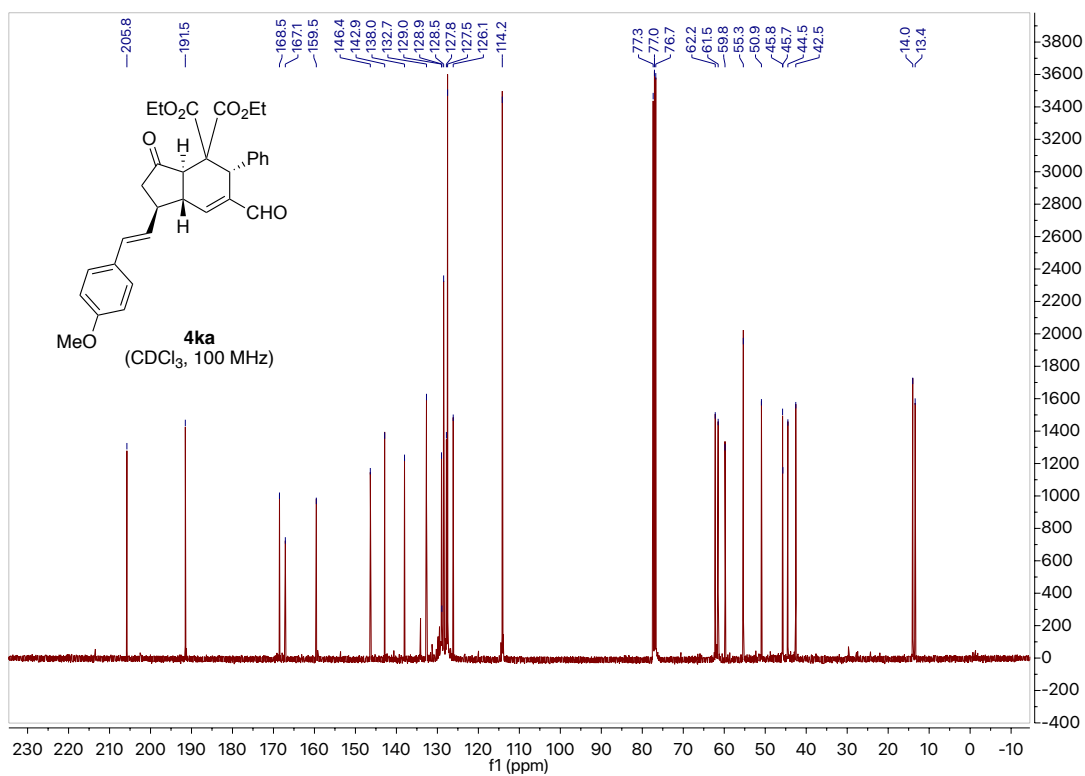

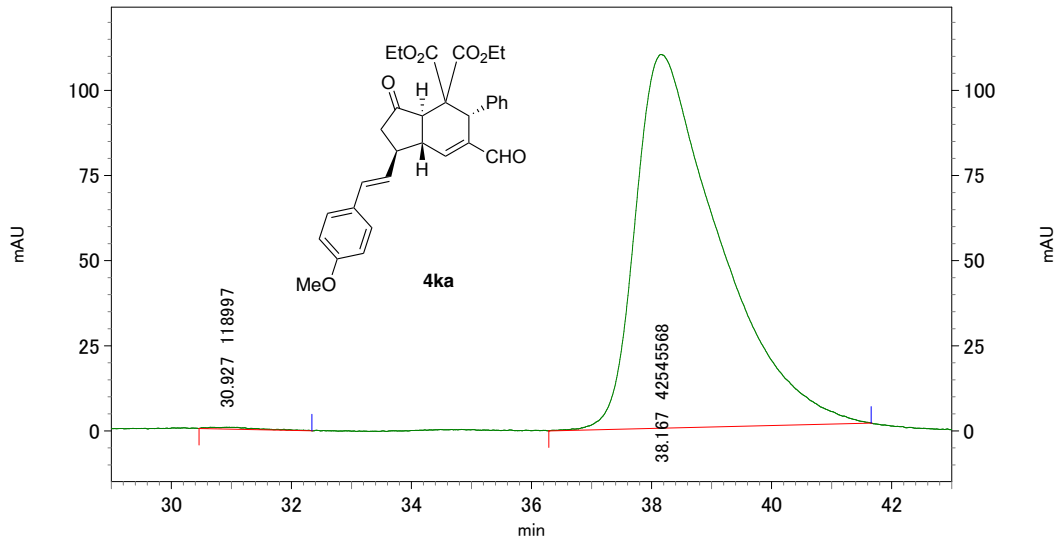

Result  
1: 210 nm, 4 nm結果

| Pk #  | Retention time / min | Integration / % |
|-------|----------------------|-----------------|
| 1     | 30.927               | 0.279           |
| 2     | 38.167               | 99.721          |
| トータル  |                      | 100.000         |
| Total |                      | 100.000         |

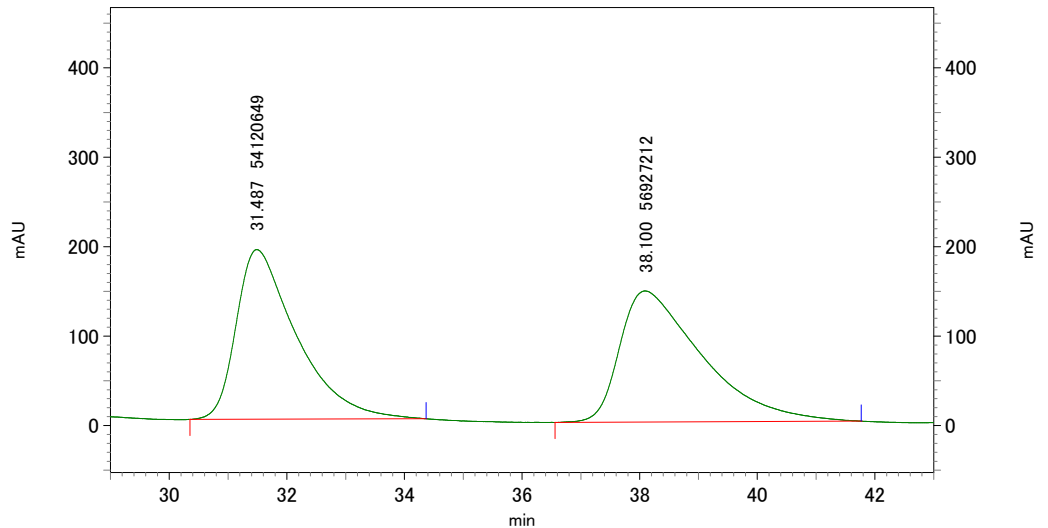

Result  
1: 210 nm, 4 nm結果

| Pk #  | Retention time / min | Integration / % |
|-------|----------------------|-----------------|
| 1     | 31.487               | 48.736          |
| 2     | 38.100               | 51.264          |
| トータル  |                      | 100.000         |
| Total |                      | 100.000         |



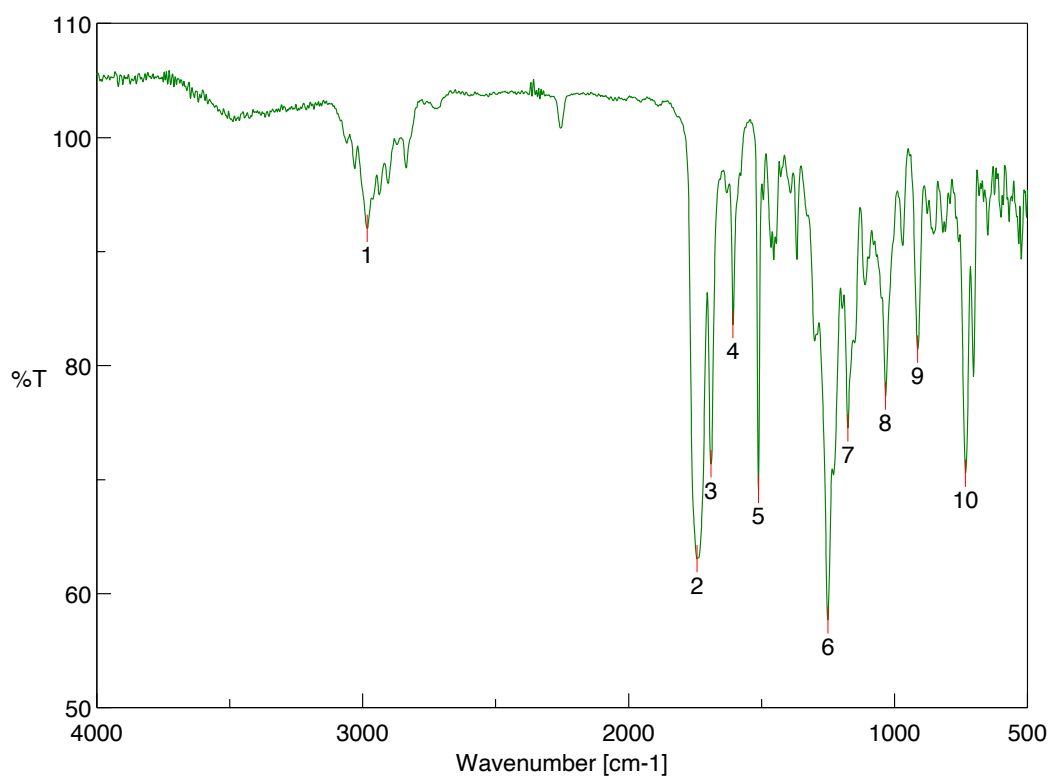

[ ピーク検出結果 ]

| No. | 位置      | 強度      | No. | 位置      | 強度      |
|-----|---------|---------|-----|---------|---------|
| 1   | 2983.34 | 92.0144 | 2   | 1742.37 | 63.0588 |
| 3   | 1690.3  | 71.3659 | 4   | 1607.38 | 83.593  |
| 5   | 1511.92 | 69.1276 | 6   | 1250.61 | 57.6938 |
| 7   | 1175.4  | 74.5111 | 8   | 1033.66 | 77.3139 |
| 9   | 913.129 | 81.4345 | 10  | 732.817 | 70.5584 |

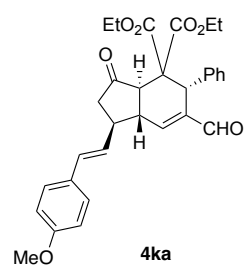

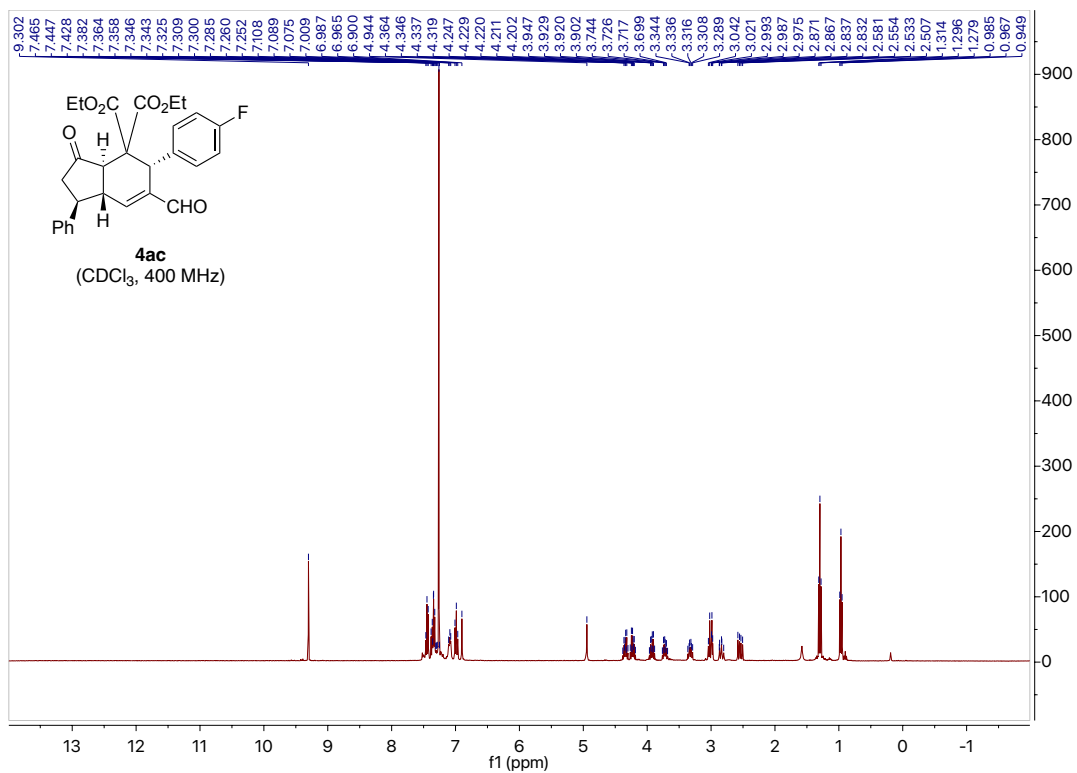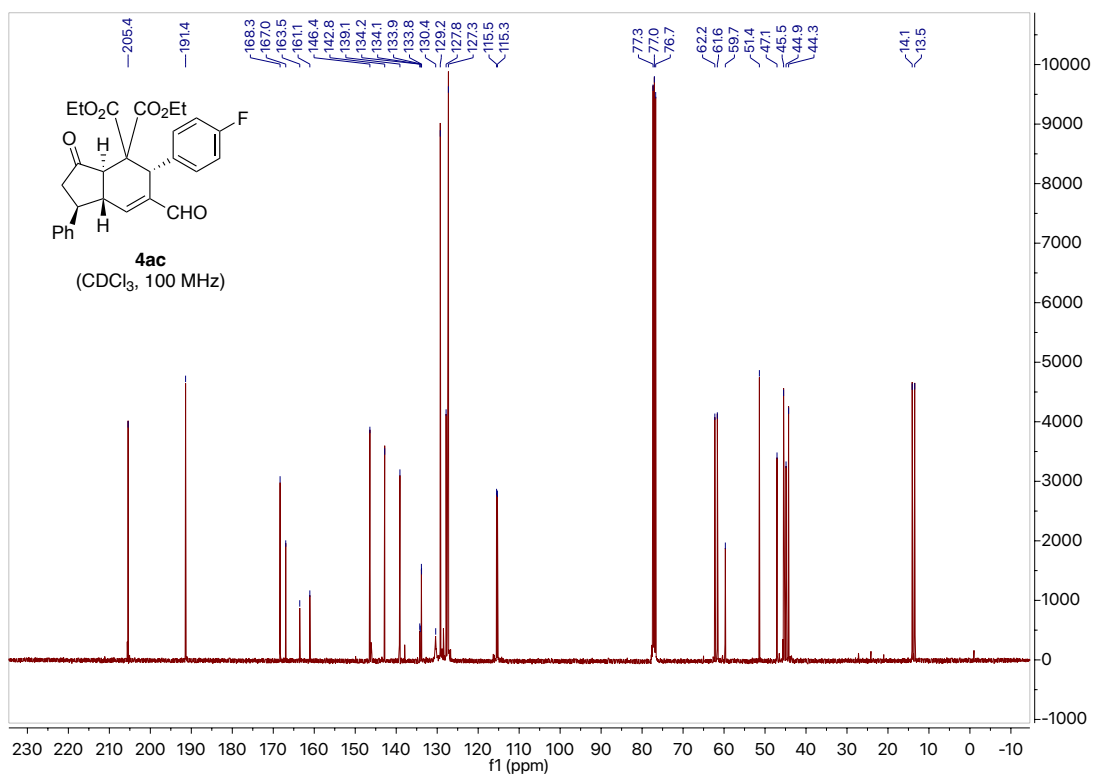

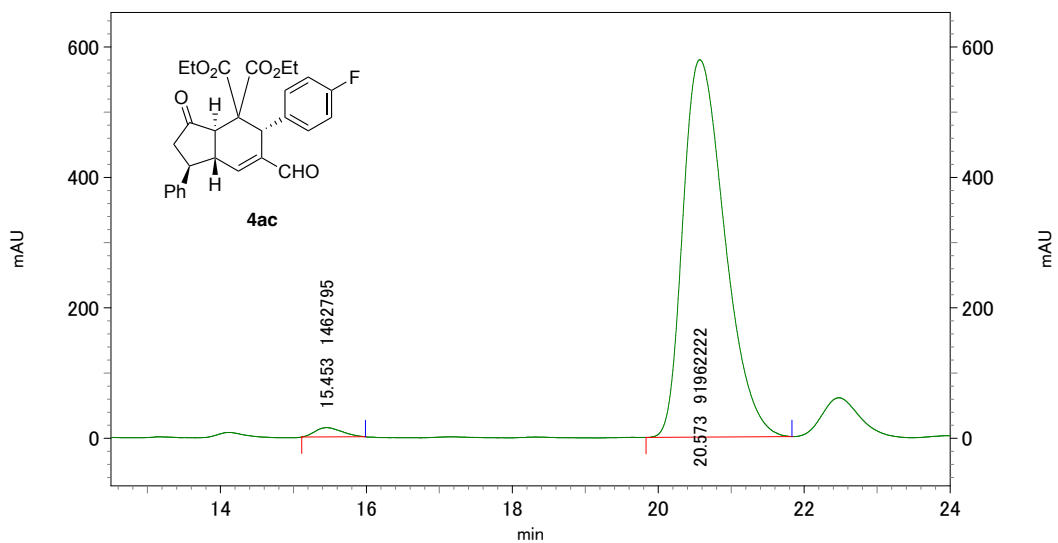

Result  
2: 208 nm, 4 nm結果

| Pk # | Retention time / min | Integration / % |
|------|----------------------|-----------------|
| 1    | 15.453               | 1.566           |
| 2    | 20.573               | 98.434          |

|       |  |         |
|-------|--|---------|
| トータル  |  | 100.000 |
| Total |  |         |

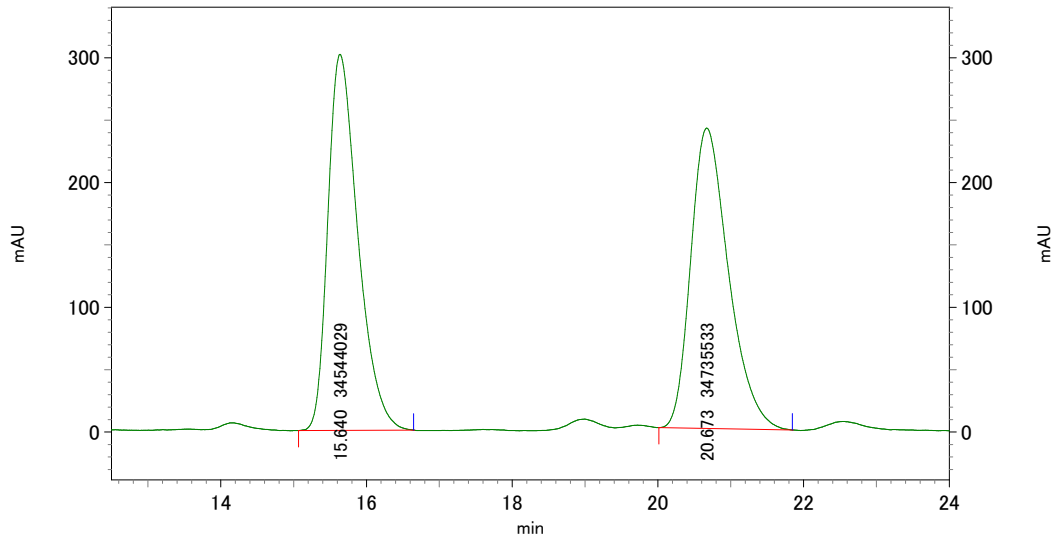

Result  
2: 208 nm, 4 nm結果

| Pk # | Retention time / min | Integration / % |
|------|----------------------|-----------------|
| 1    | 15.640               | 49.862          |
| 2    | 20.673               | 50.138          |

|       |  |         |
|-------|--|---------|
| トータル  |  | 100.000 |
| Total |  |         |

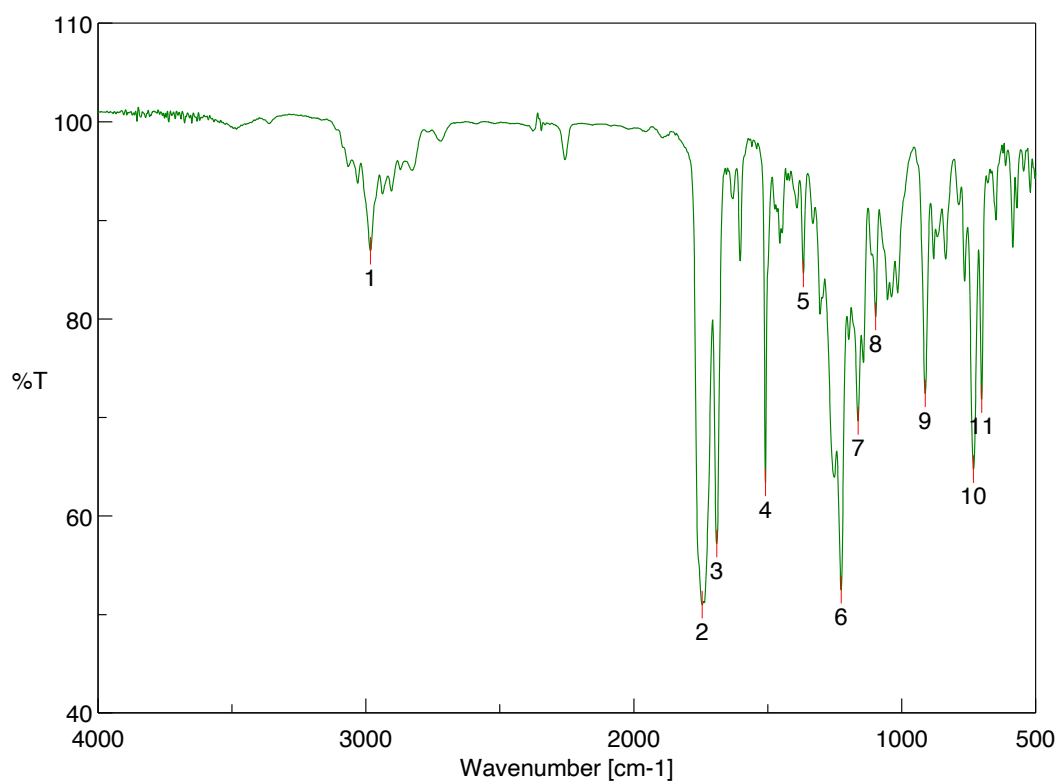

[ピーク検出結果]

| No. | 位置      | 強度      | No. | 位置      | 強度      |
|-----|---------|---------|-----|---------|---------|
| 1   | 2983.34 | 86.9017 | 2   | 1744.3  | 50.985  |
| 3   | 1690.3  | 57.1976 | 4   | 1508.06 | 63.4037 |
| 5   | 1367.28 | 84.5976 | 6   | 1225.54 | 52.5012 |
| 7   | 1162.87 | 69.6204 | 8   | 1097.3  | 80.2259 |
| 9   | 912.165 | 72.428  | 10  | 731.853 | 64.7203 |
| 11  | 700.998 | 71.8327 |     |         |         |

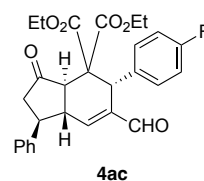

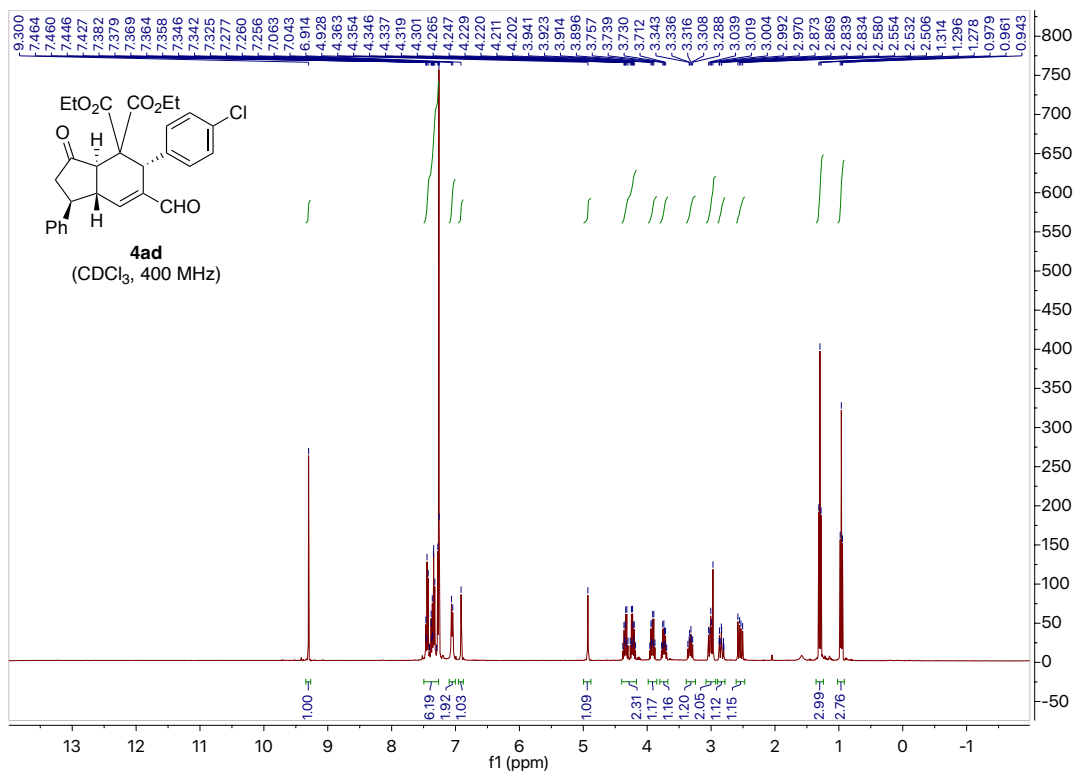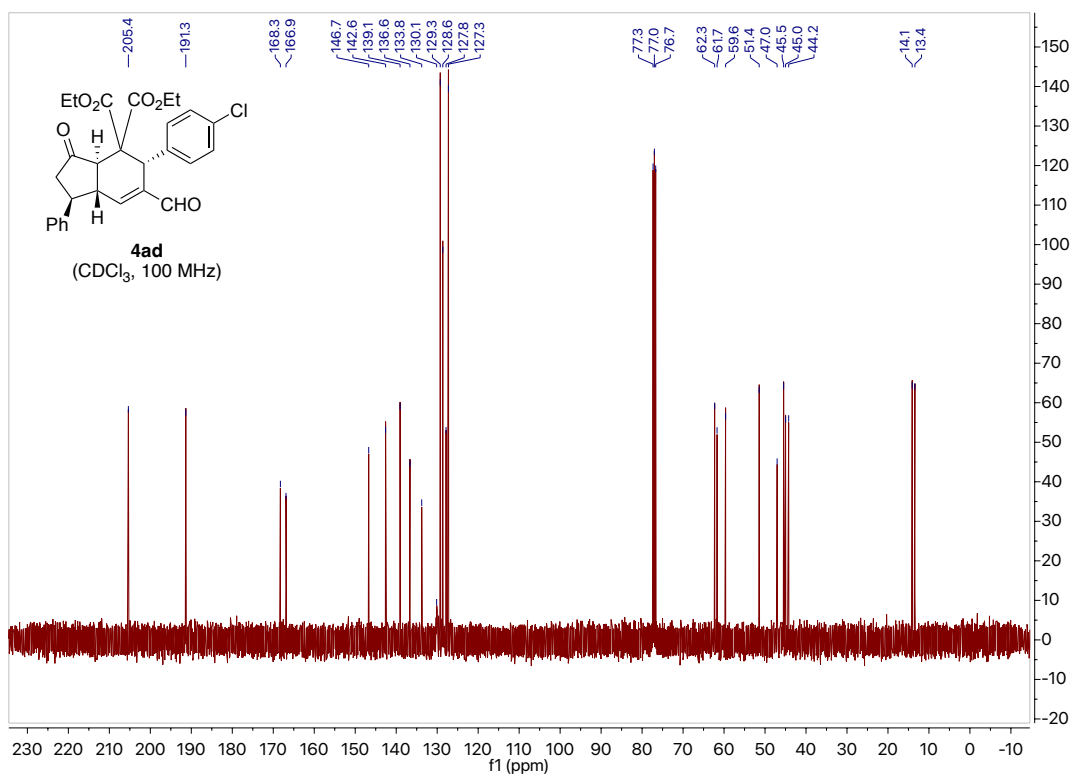

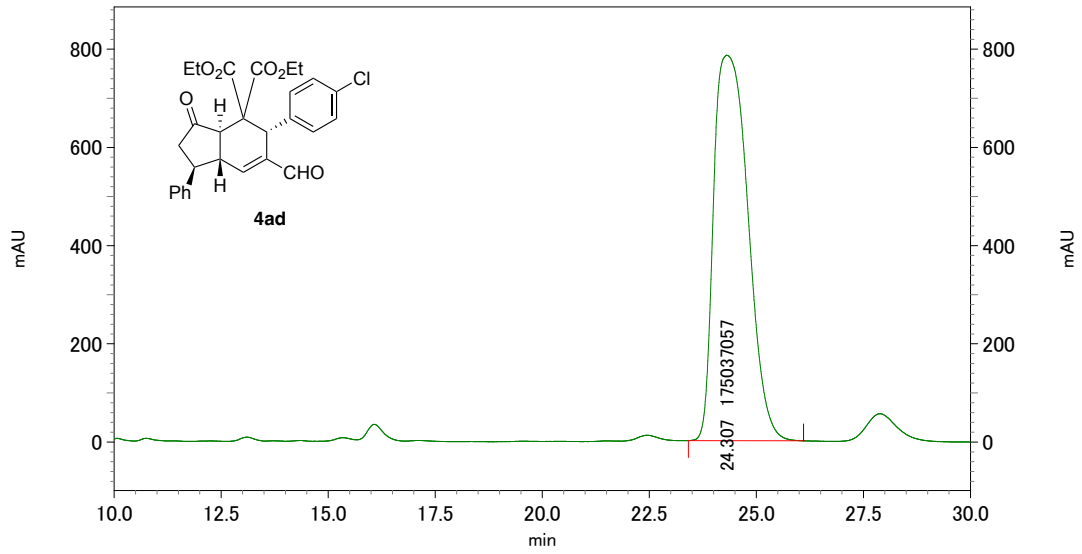

Result  
2: 208 nm, 4 nm結果

| Pk # | Retention time / min | Integration / % |
|------|----------------------|-----------------|
| 1    | 24.307               | 100.000         |

|       |  |         |
|-------|--|---------|
| トータル  |  | 100.000 |
| Total |  |         |

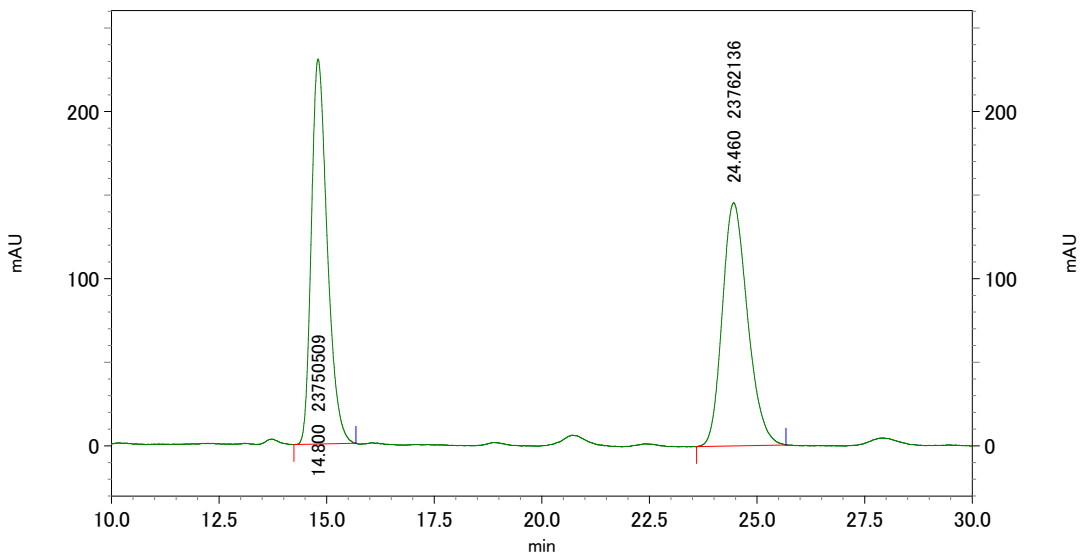

Result  
2: 208 nm, 4 nm結果

| Pk # | Retention time / min | Integration / % |
|------|----------------------|-----------------|
| 1    | 14.800               | 49.988          |
| 2    | 24.460               | 50.012          |

|       |  |         |
|-------|--|---------|
| トータル  |  | 100.000 |
| Total |  |         |

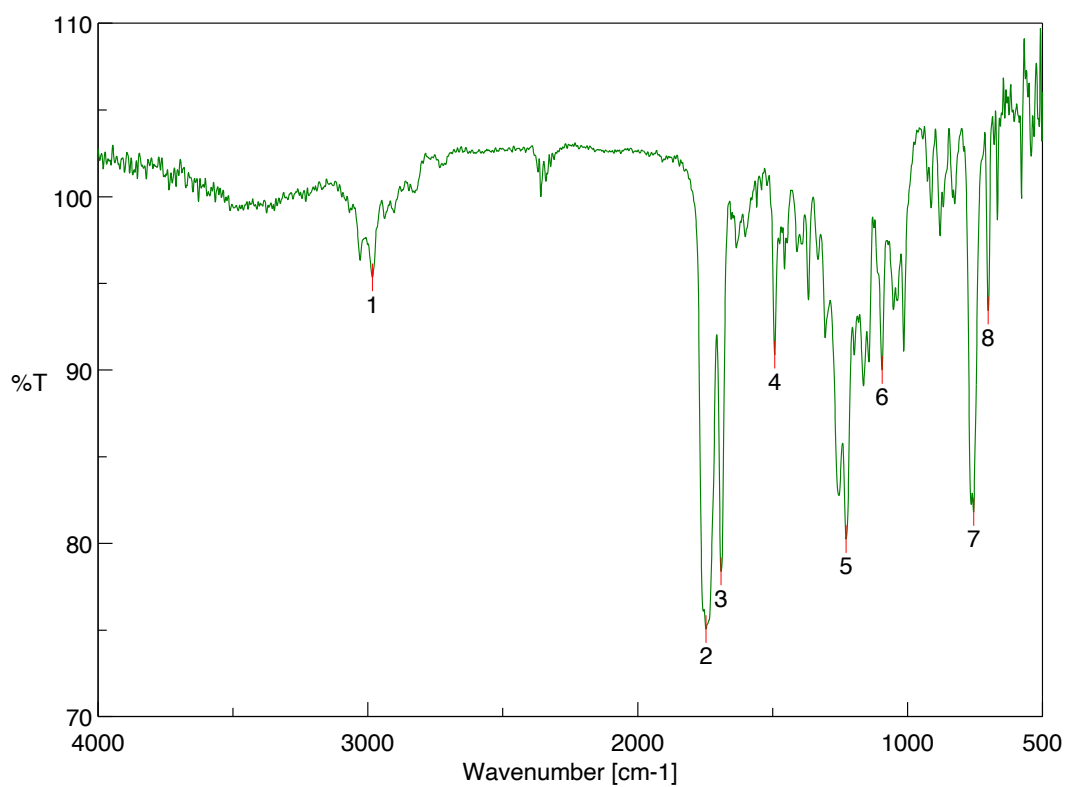

[ピーク検出結果]

| No. | 位置      | 強度      | No. | 位置      | 強度      |
|-----|---------|---------|-----|---------|---------|
| 1   | 2983.34 | 95.3392 | 2   | 1747.19 | 75.0427 |
| 3   | 1691.27 | 78.3739 | 4   | 1492.63 | 90.869  |
| 5   | 1227.47 | 80.2433 | 6   | 1094.4  | 89.985  |
| 7   | 754.995 | 81.8014 | 8   | 700.998 | 93.4221 |

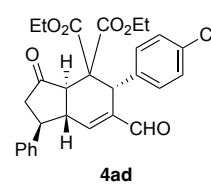

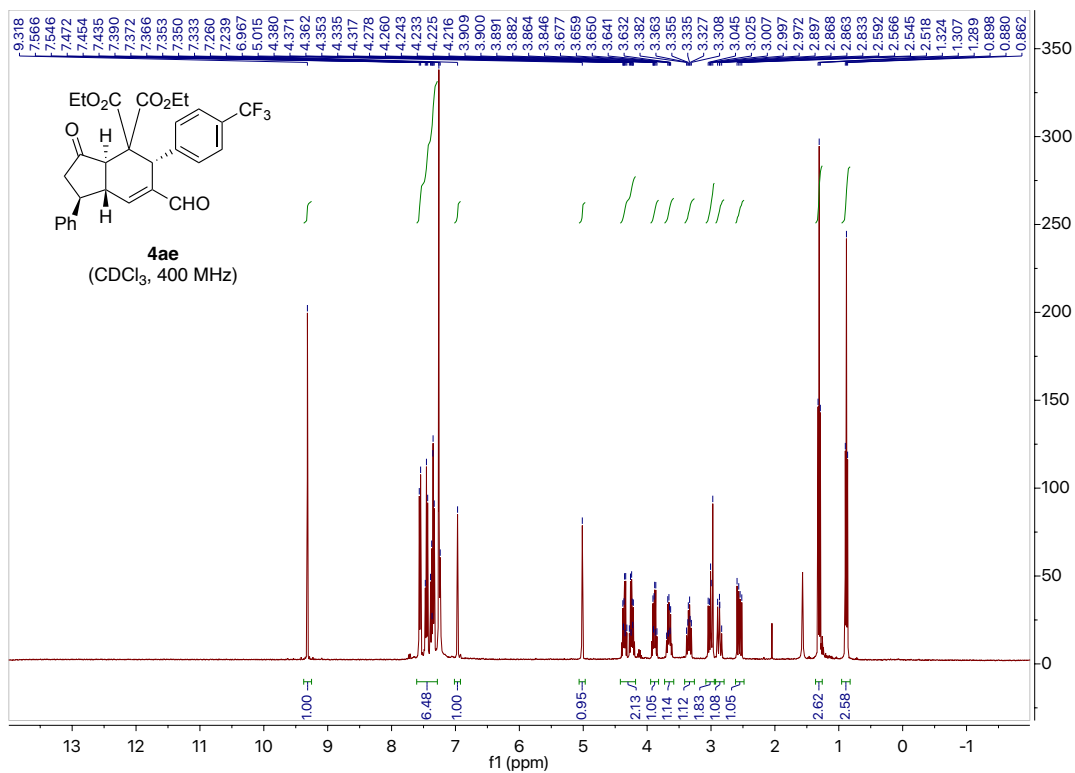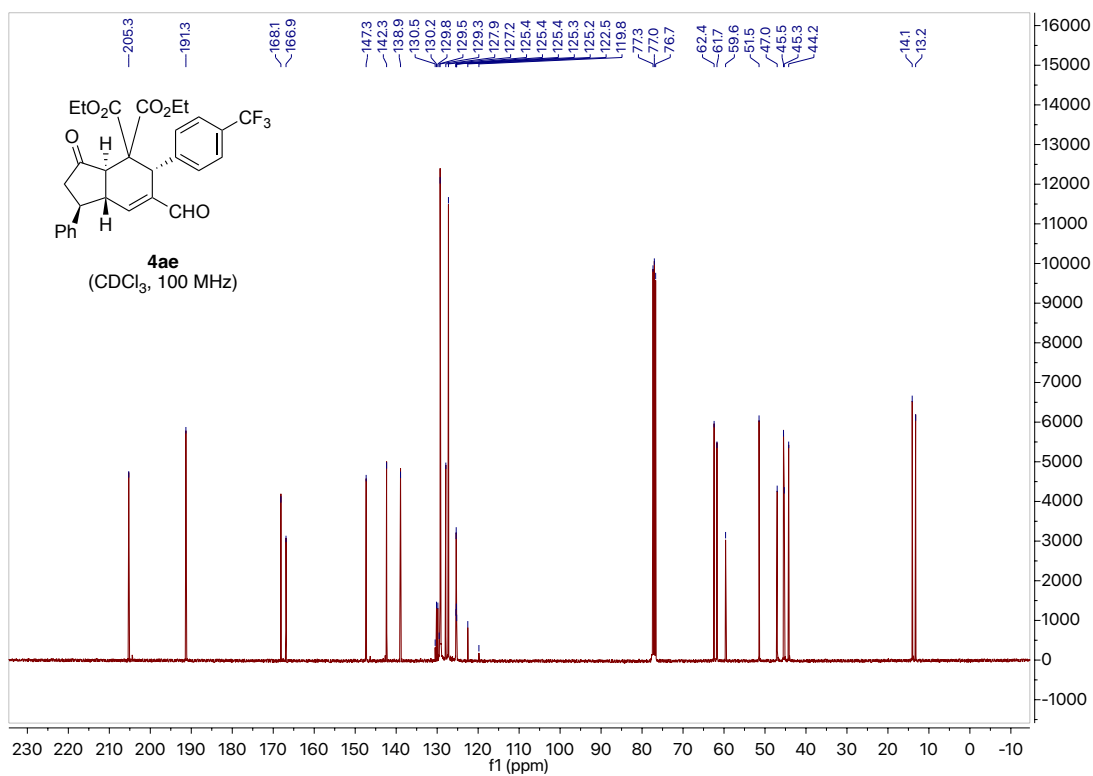



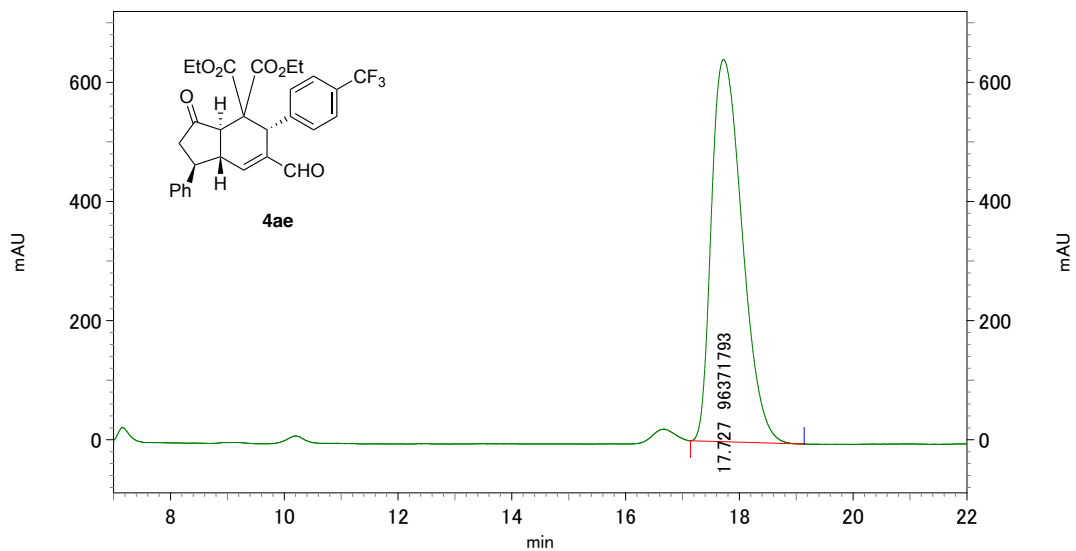

Result  
2: 208 nm, 4 nm結果

| Pk # | Retention time / min | Integration/ % |
|------|----------------------|----------------|
| 1    | 17.727               | 100.000        |

|       |  |         |
|-------|--|---------|
| トータル  |  | 100.000 |
| Total |  |         |

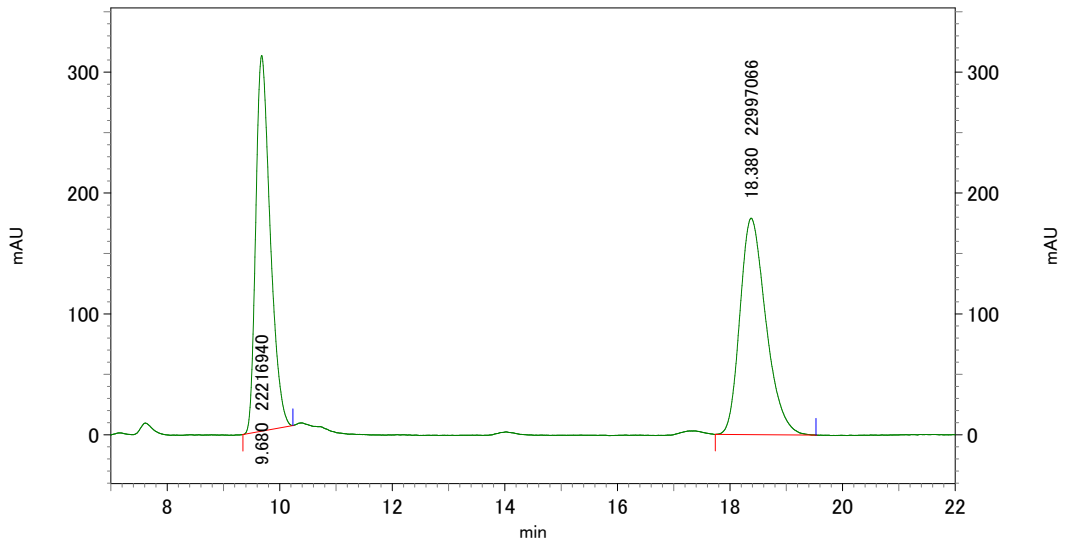

Result  
2: 208 nm, 4 nm結果

| Pk # | Retention time / min | Integration/ % |
|------|----------------------|----------------|
| 1    | 9.680                | 49.137         |
| 2    | 18.380               | 50.863         |

|       |  |         |
|-------|--|---------|
| トータル  |  | 100.000 |
| Total |  |         |

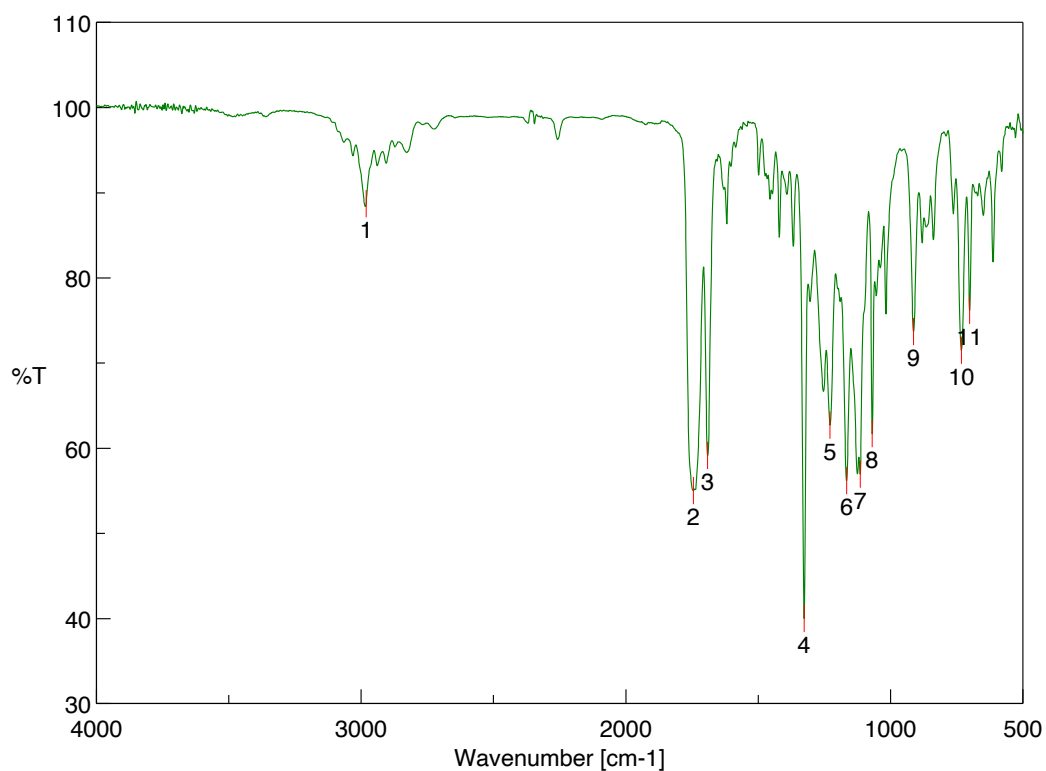

[ ピーク検出結果 ]

| No. | 位置      | 強度      | No. | 位置      | 強度      |
|-----|---------|---------|-----|---------|---------|
| 1   | 2981.41 | 88.7081 | 2   | 1745.26 | 54.9948 |
| 3   | 1691.27 | 59.1406 | 4   | 1326.79 | 39.9955 |
| 5   | 1228.43 | 62.7038 | 6   | 1165.76 | 56.1624 |
| 7   | 1114.65 | 56.9458 | 8   | 1069.33 | 61.6875 |
| 9   | 913.129 | 73.6797 | 10  | 731.853 | 71.4939 |
| 11  | 700.998 | 76.1615 |     |         |         |

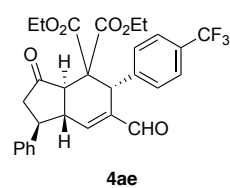

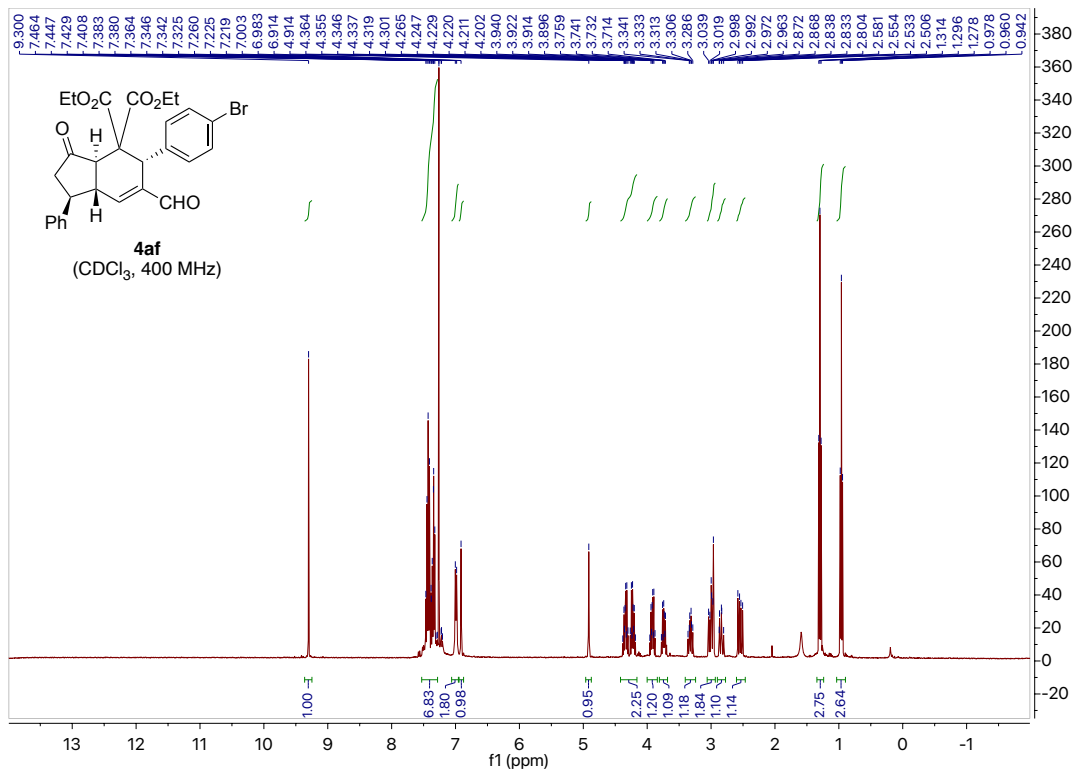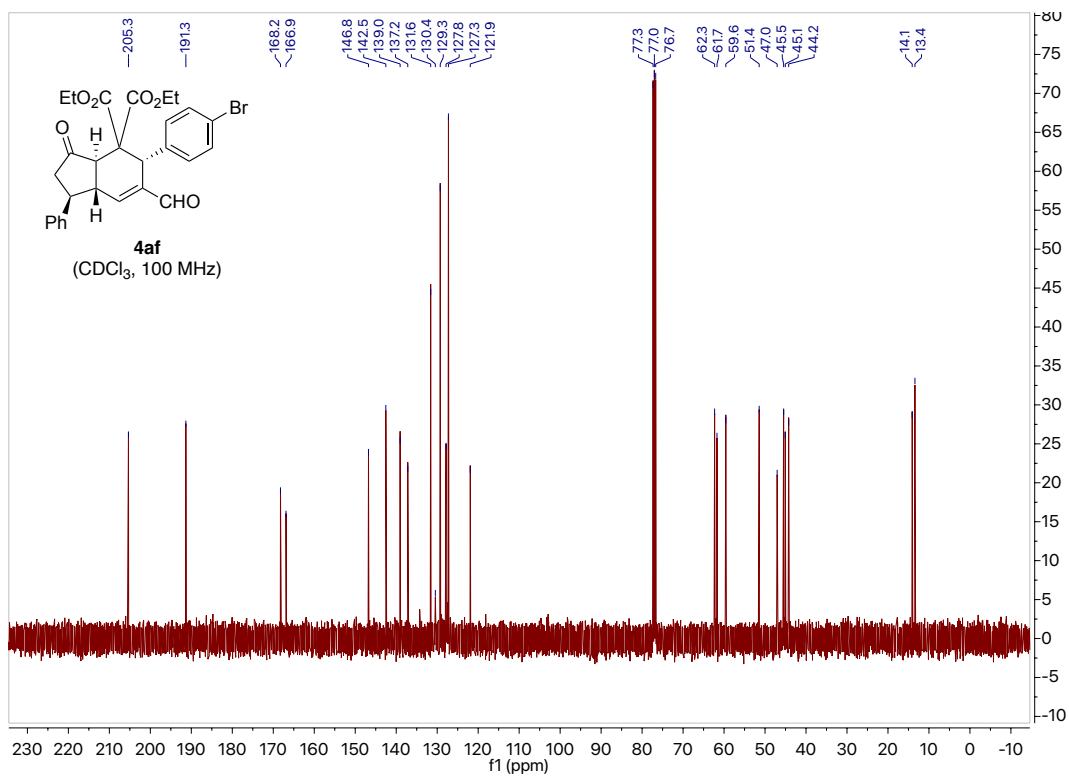

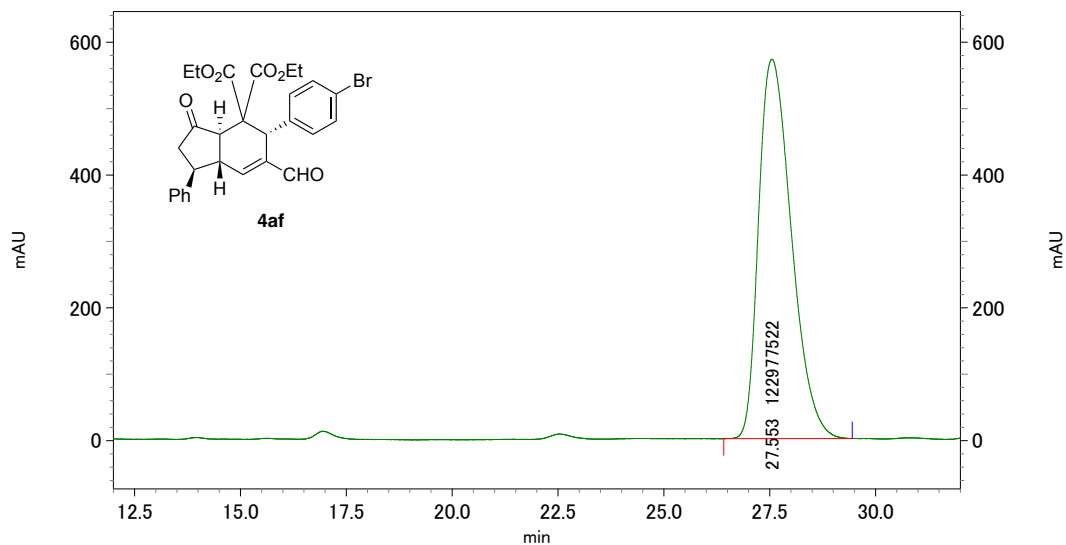

Result  
2: 208 nm, 4 nm結果

| Pk # | Retention time / min | Integration/ % |
|------|----------------------|----------------|
| 1    | 27.553               | 100.000        |

|       |  |         |
|-------|--|---------|
| トータル  |  | 100.000 |
| Total |  |         |

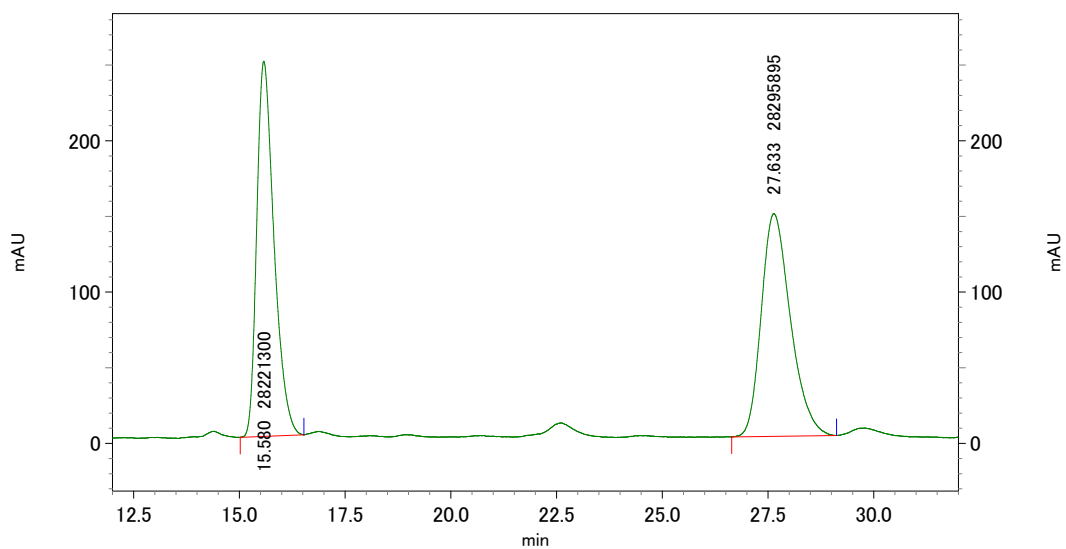

Result  
2: 208 nm, 4 nm結果

| Pk # | Retention time / min | Integration/ % |
|------|----------------------|----------------|
| 1    | 15.580               | 49.934         |
| 2    | 27.633               | 50.066         |

|       |  |         |
|-------|--|---------|
| トータル  |  | 100.000 |
| Total |  |         |

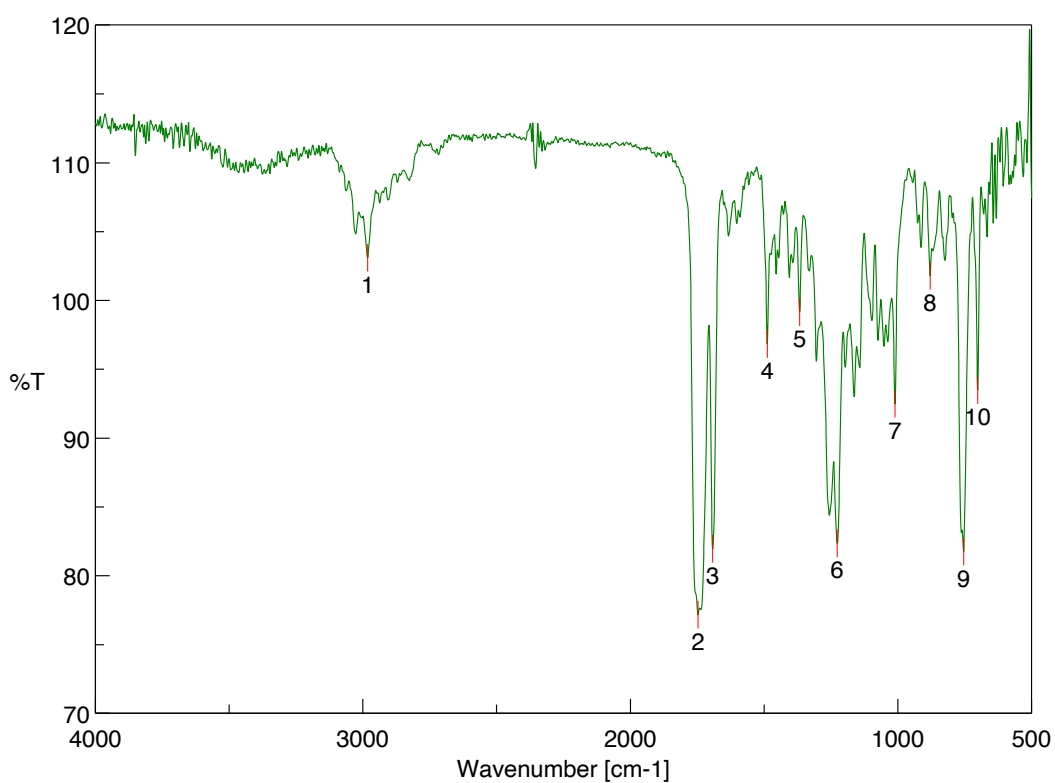

[ ピーク検出結果 ]

| No. | 位置      | 強度      | No. | 位置      | 強度      |
|-----|---------|---------|-----|---------|---------|
| 1   | 2982.37 | 103.082 | 2   | 1747.19 | 77.1648 |
| 3   | 1692.23 | 81.9425 | 4   | 1487.81 | 96.822  |
| 5   | 1367.28 | 99.1295 | 6   | 1226.5  | 82.3304 |
| 7   | 1010.52 | 92.4804 | 8   | 879.381 | 101.769 |
| 9   | 754.031 | 81.7418 | 10  | 700.998 | 93.4735 |

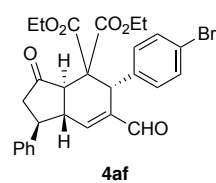

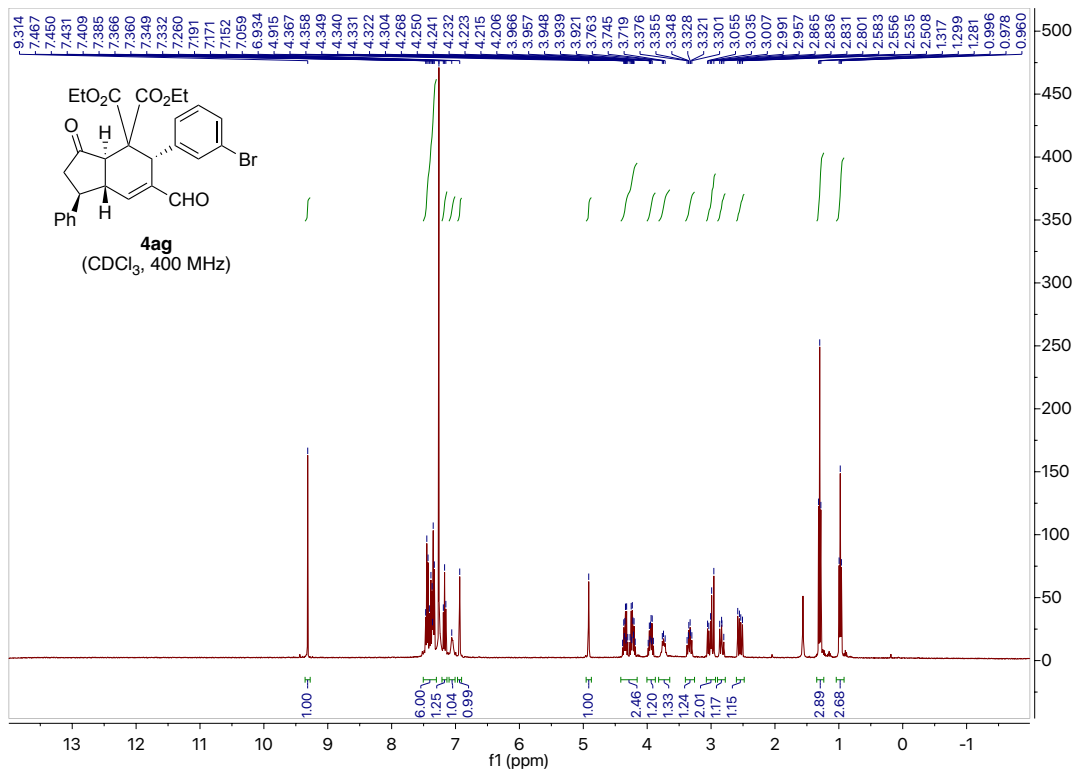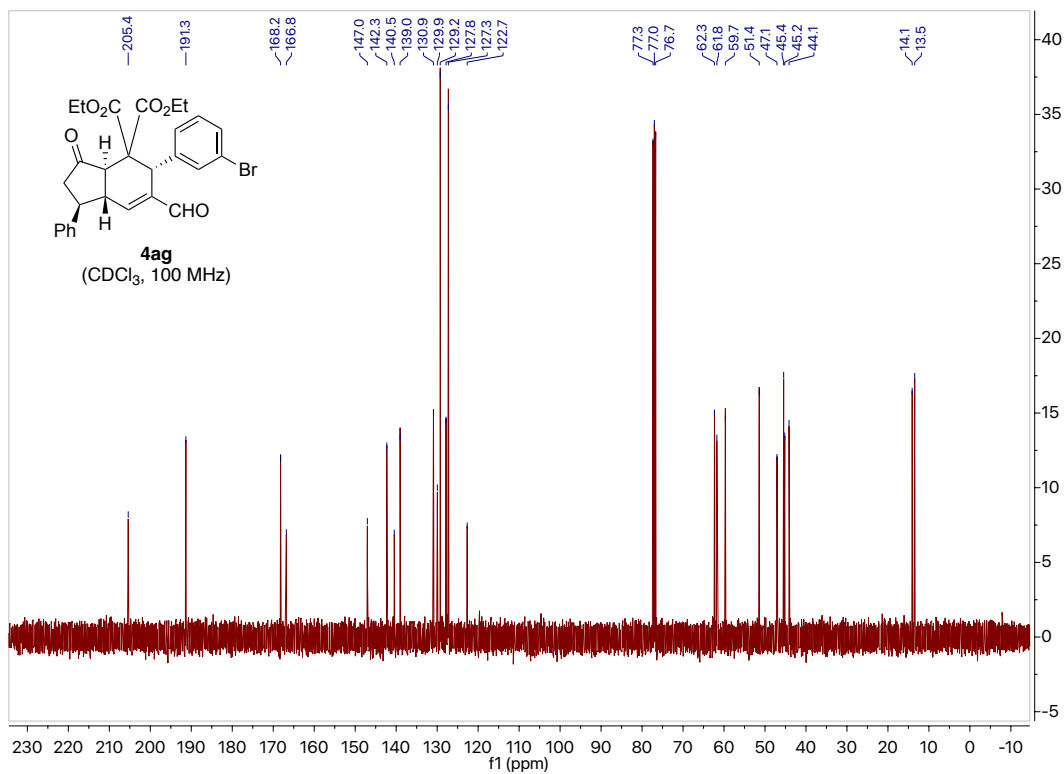

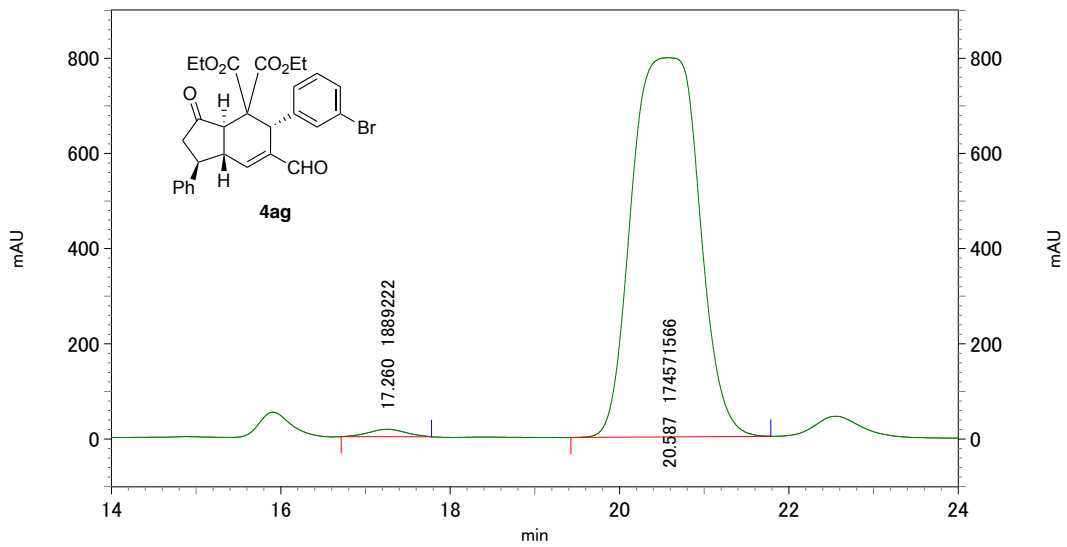

Result  
2: 208 nm, 4 nm結果

| Pk # | Retention time / min | Integration/ % |
|------|----------------------|----------------|
| 1    | 17.260               | 1.071          |
| 2    | 20.587               | 98.929         |

|       |  |         |
|-------|--|---------|
| トータル  |  | 100.000 |
| Total |  |         |

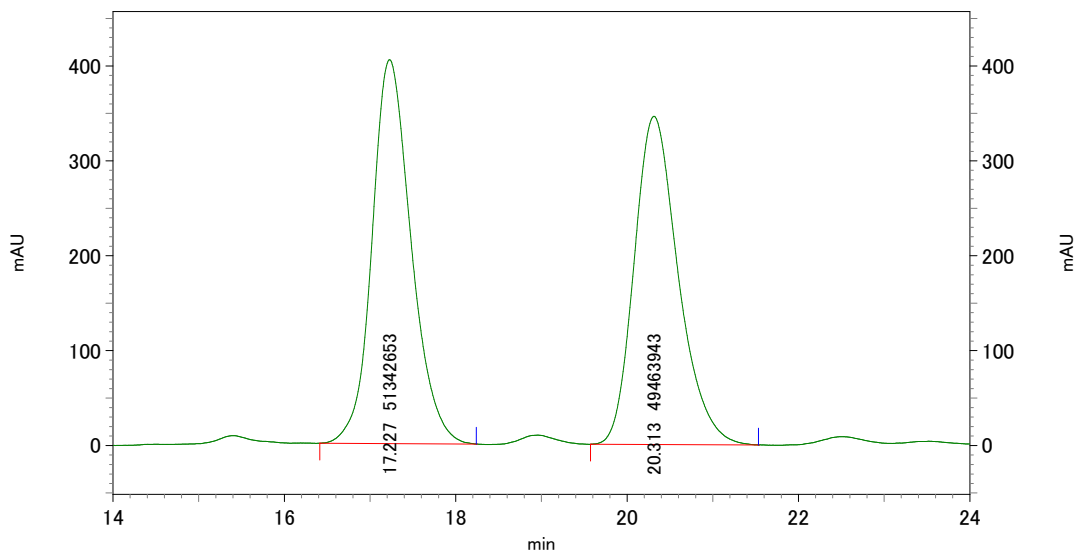

Result  
2: 208 nm, 4 nm結果

| Pk # | Retention time / min | Integration/ % |
|------|----------------------|----------------|
| 1    | 17.227               | 50.932         |
| 2    | 20.313               | 49.068         |

|       |  |         |
|-------|--|---------|
| トータル  |  | 100.000 |
| Total |  |         |

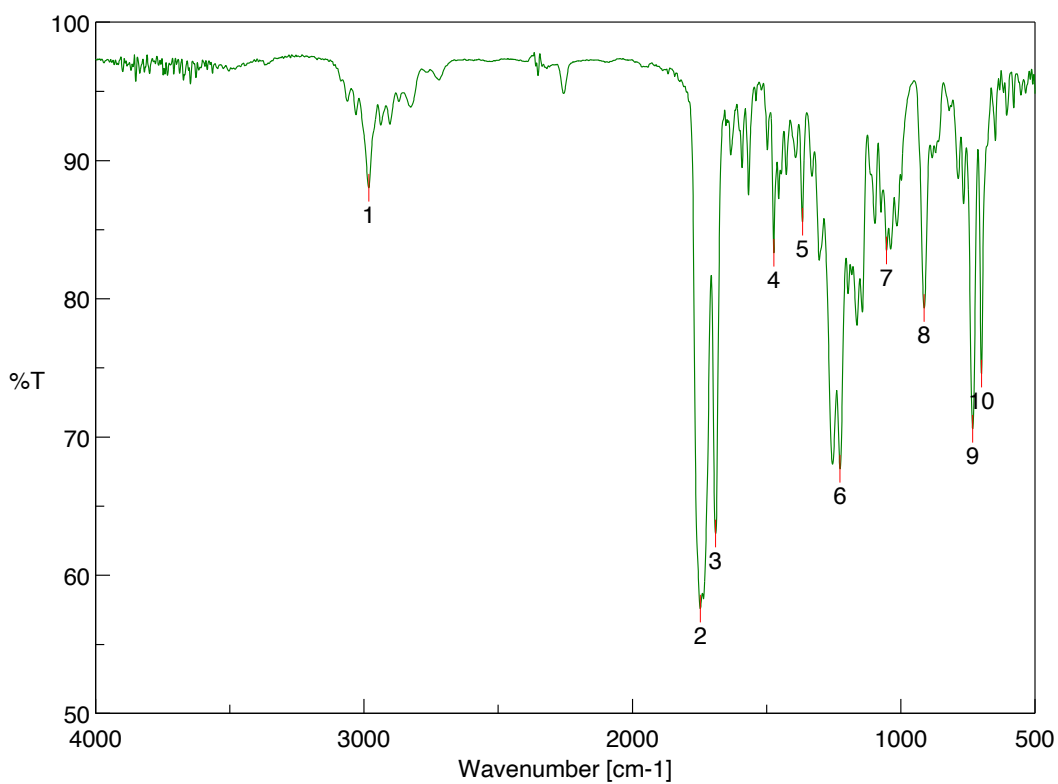

[ ピーク検出結果 ]

| No. | 位置      | 強度      | No. | 位置      | 強度      |
|-----|---------|---------|-----|---------|---------|
| 1   | 2982.37 | 88.0083 | 2   | 1747.19 | 57.5698 |
| 3   | 1690.3  | 63.0109 | 4   | 1473.35 | 83.3197 |
| 5   | 1366.32 | 85.5669 | 6   | 1226.5  | 67.6817 |
| 7   | 1052.94 | 83.4753 | 8   | 913.129 | 79.3109 |
| 9   | 731.853 | 70.5871 | 10  | 699.069 | 74.5755 |

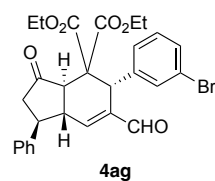



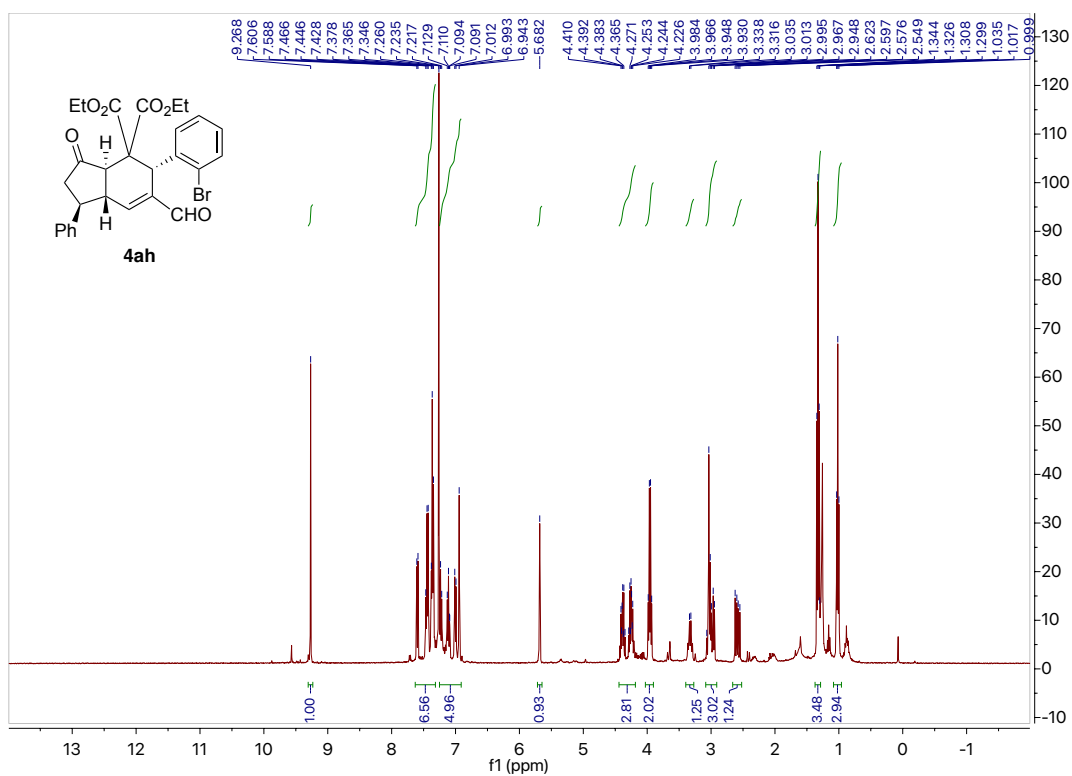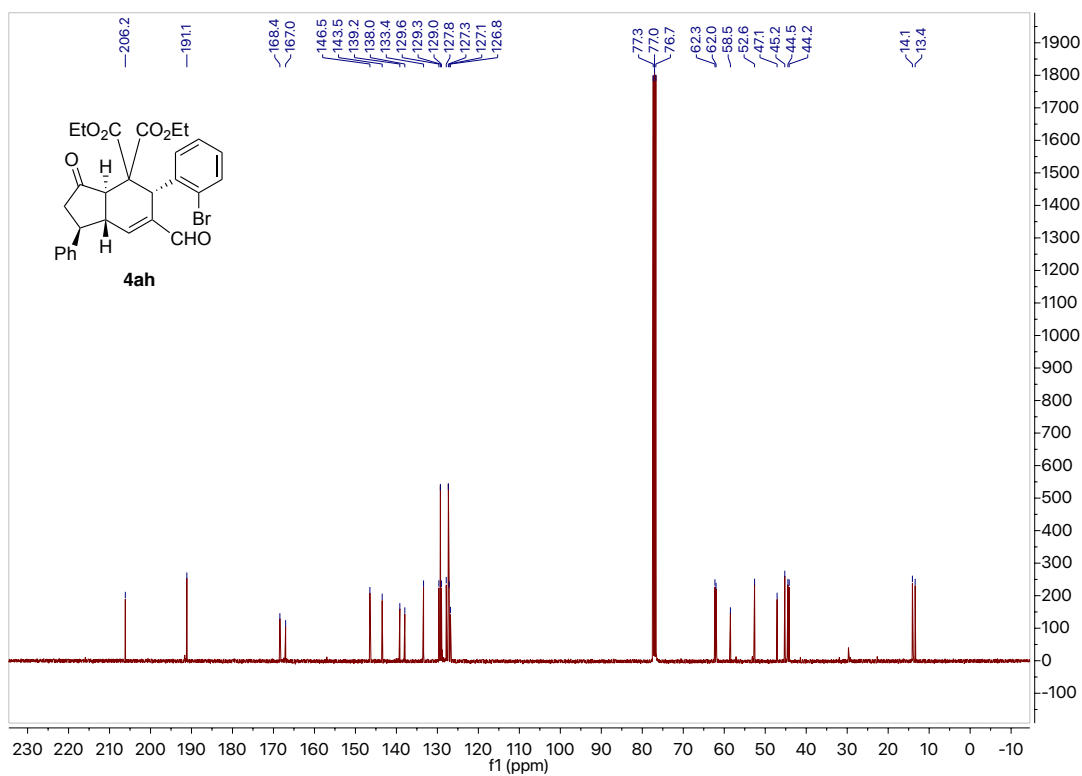

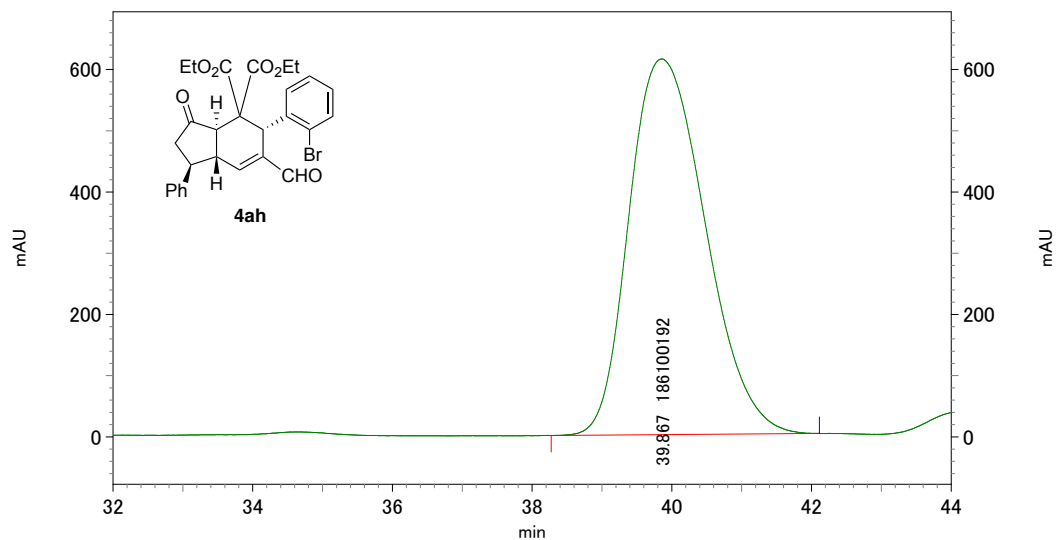

Result  
2: 208 nm, 4 nm結果

| Pk # | Retention time / min | Integration/ % |
|------|----------------------|----------------|
| 1    | 39.867               | 100.000        |

|       |  |         |
|-------|--|---------|
| トータル  |  | 100.000 |
| Total |  |         |

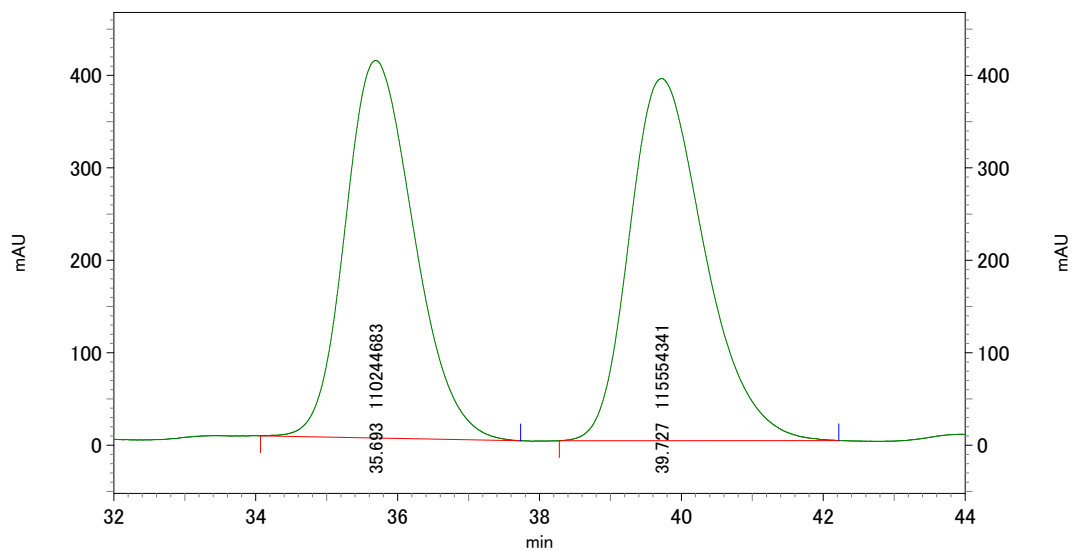

Result  
2: 208 nm, 4 nm結果

| Pk # | Retention time / min | Integration/ % |
|------|----------------------|----------------|
| 1    | 35.693               | 48.824         |
| 2    | 39.727               | 51.176         |

|       |  |         |
|-------|--|---------|
| トータル  |  | 100.000 |
| Total |  |         |

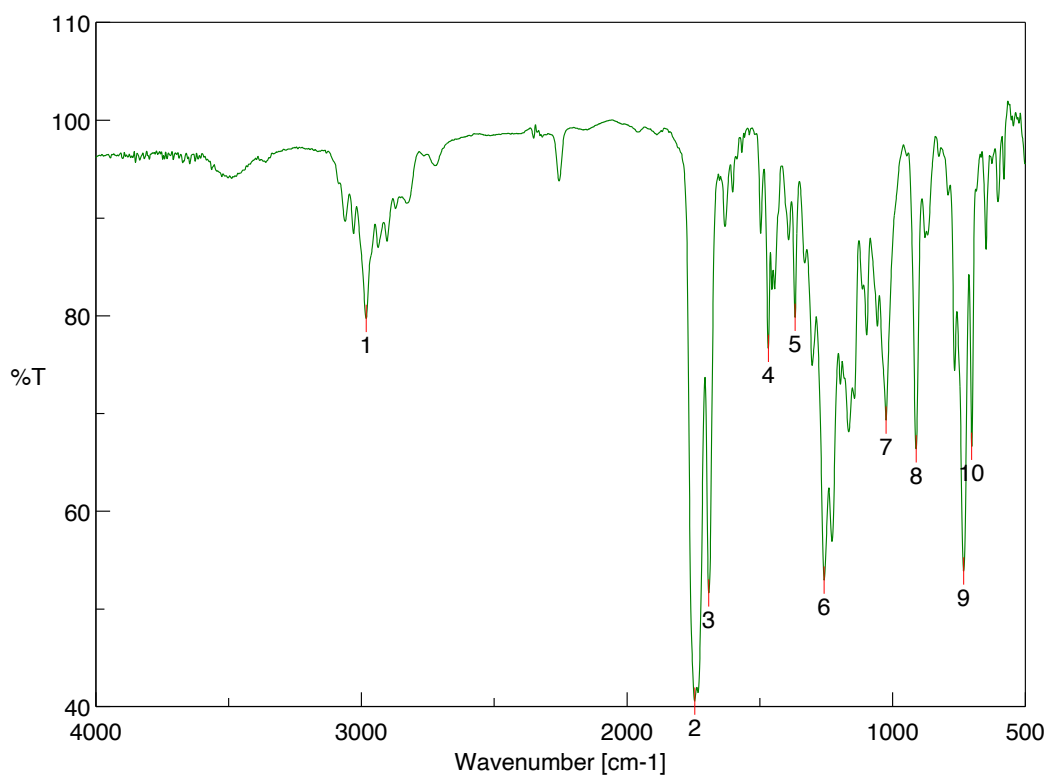

[ ピーク検出結果 ]

| No. | 位置      | 強度      | No. | 位置      | 強度      |
|-----|---------|---------|-----|---------|---------|
| 1   | 2982.37 | 79.6948 | 2   | 1745.26 | 40.56   |
| 3   | 1692.23 | 51.629  | 4   | 1467.56 | 76.6521 |
| 5   | 1367.28 | 79.8348 | 6   | 1257.36 | 52.9369 |
| 7   | 1024.02 | 69.299  | 8   | 911.201 | 66.3525 |
| 9   | 731.853 | 53.8615 | 10  | 701.962 | 66.6162 |

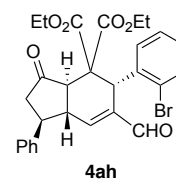

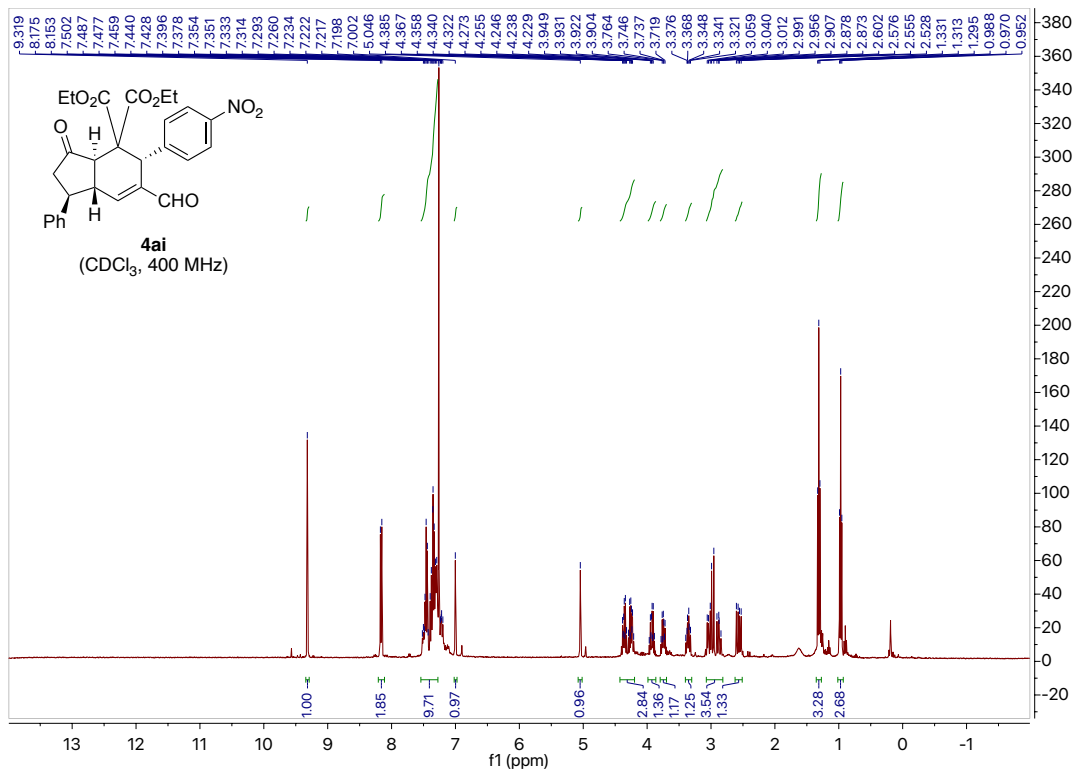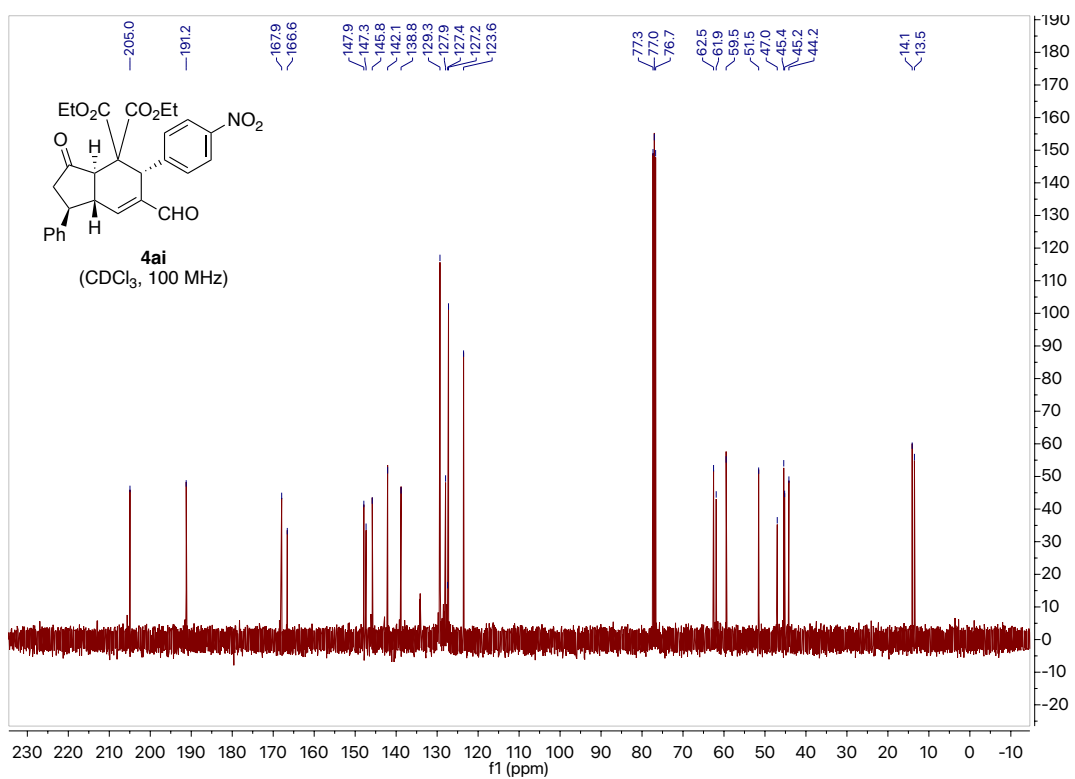

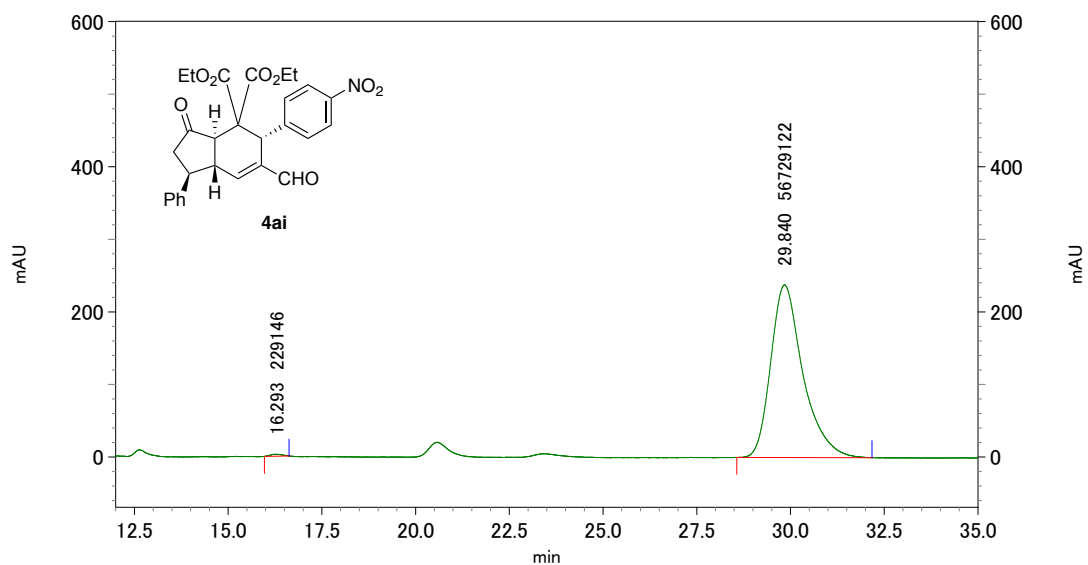

Result  
2: 208 nm, 4 nm結果

| Pk # | Retention time / min | Integration/ % |
|------|----------------------|----------------|
| 1    | 16.293               | 0.402          |
| 2    | 29.840               | 99.598         |

|       |  |         |
|-------|--|---------|
| トータル  |  | 100.000 |
| Total |  |         |

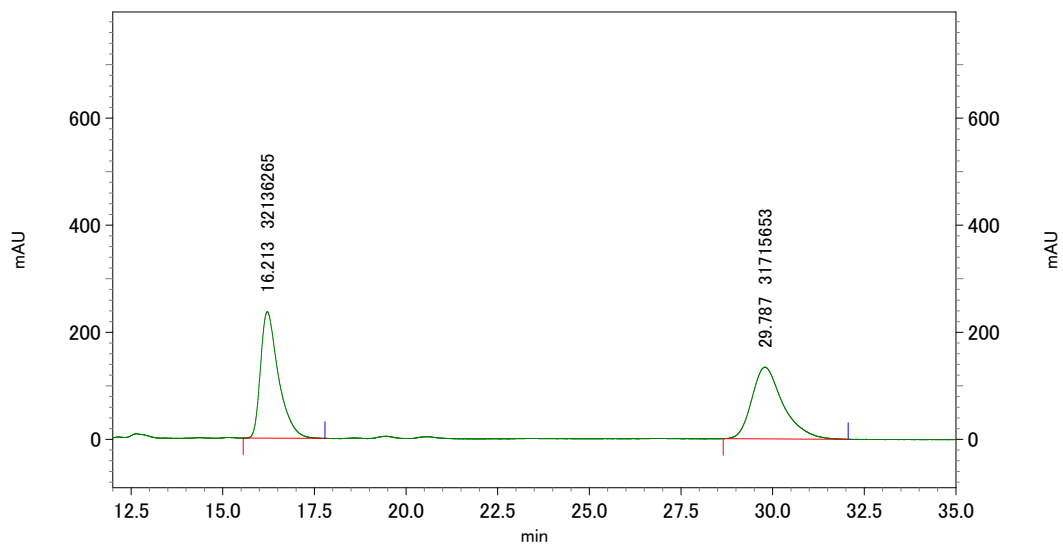

Result  
2: 208 nm, 4 nm結果

| Pk # | Retention time / min | Integration/ % |
|------|----------------------|----------------|
| 1    | 16.213               | 50.329         |
| 2    | 29.787               | 49.671         |

|       |  |         |
|-------|--|---------|
| トータル  |  | 100.000 |
| Total |  |         |

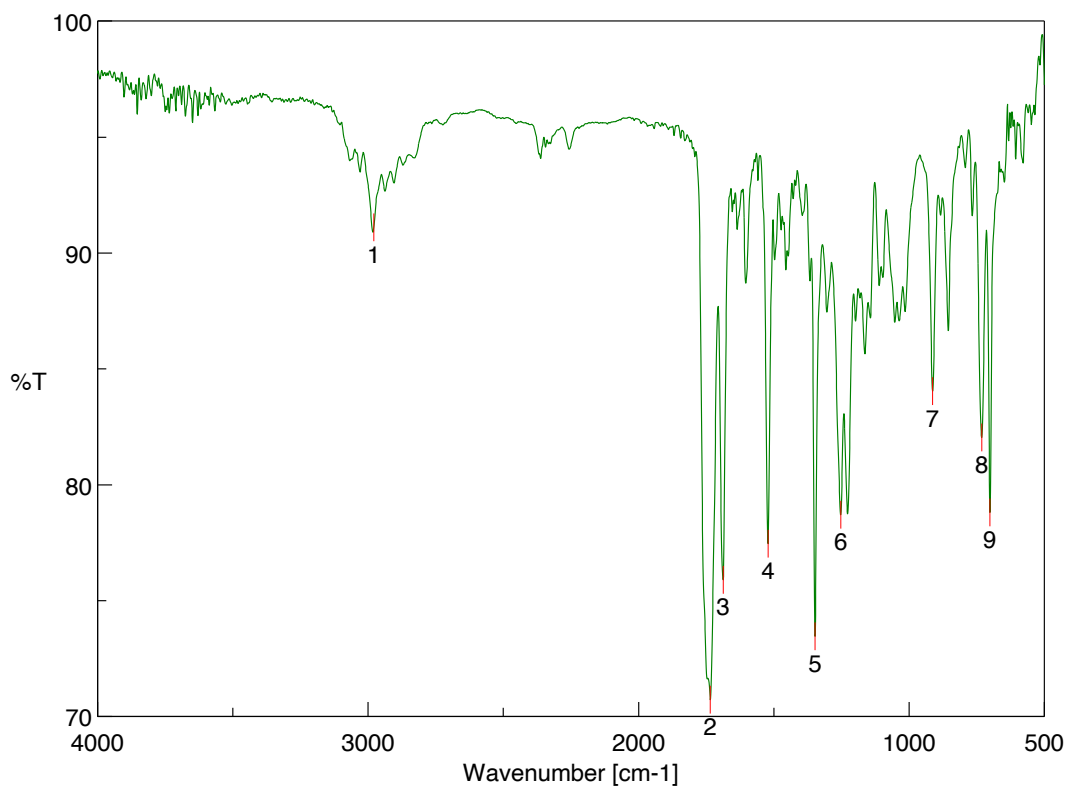

[ピーク検出結果]

| No. | 位置      | 強度      | No. | 位置      | 強度      |
|-----|---------|---------|-----|---------|---------|
| 1   | 2978.52 | 91.0931 | 2   | 1734.66 | 70.7226 |
| 3   | 1687.41 | 75.8886 | 4   | 1521.56 | 77.4493 |
| 5   | 1348    | 73.4577 | 6   | 1252.54 | 78.703  |
| 7   | 913.129 | 84.0271 | 8   | 730.889 | 82.0366 |
| 9   | 700.998 | 78.8059 |     |         |         |

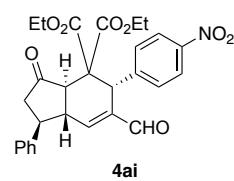

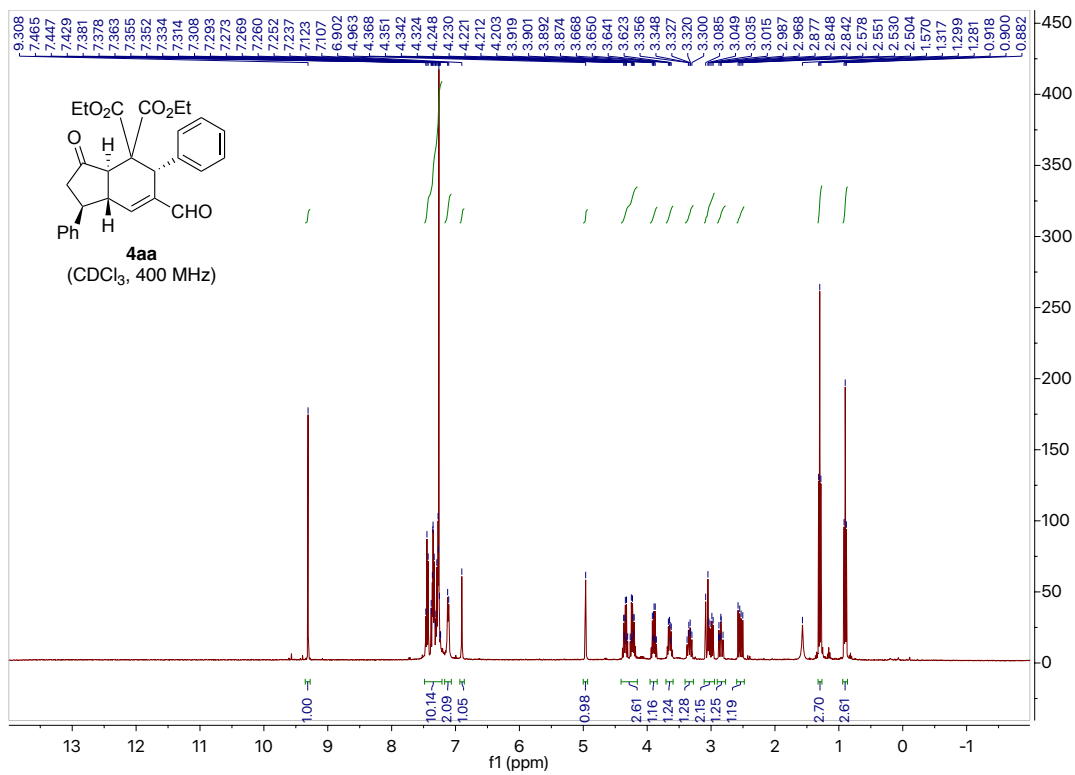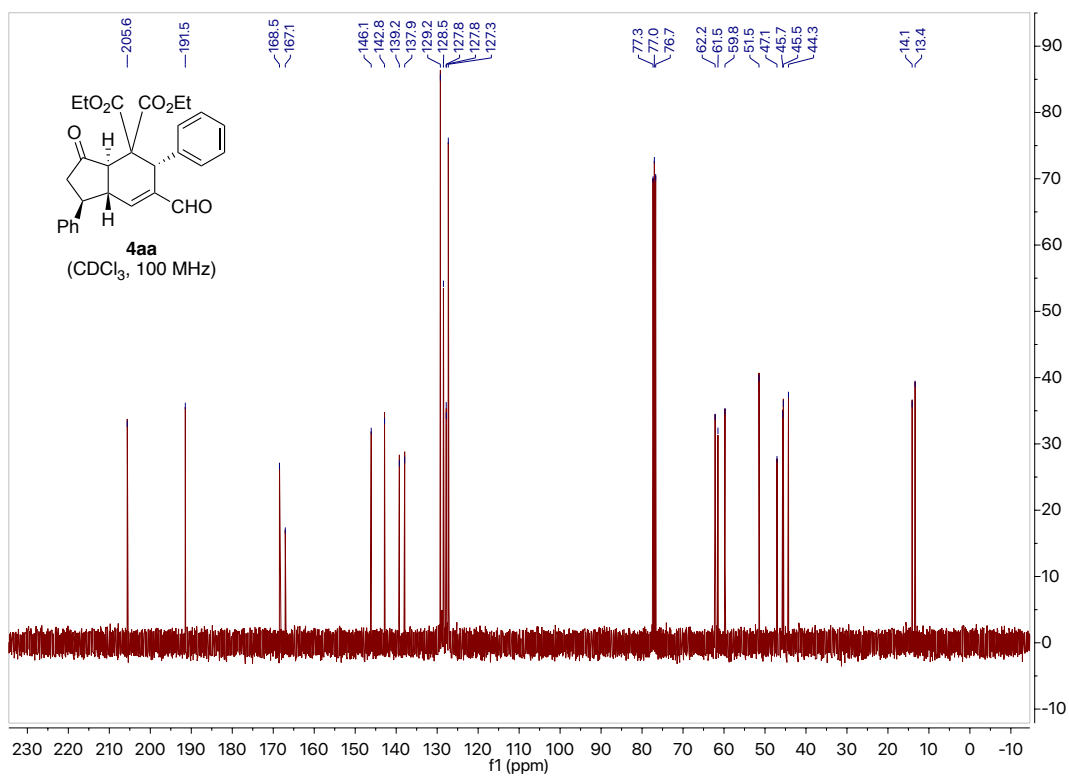

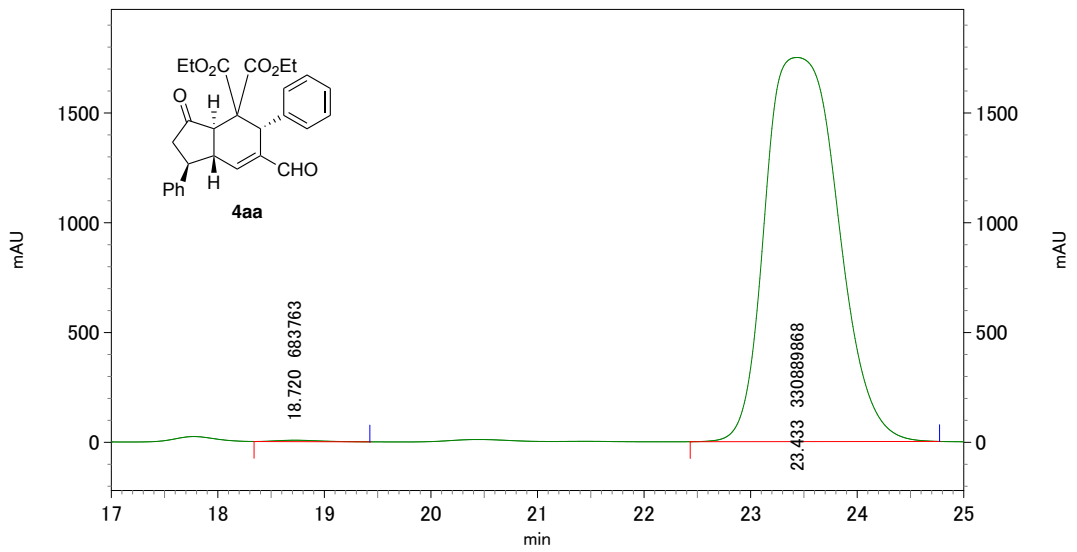

Result  
2: 210.0 nm, 4.0 nm 結果

| Pk # | Retention time / min | Integration/ % |
|------|----------------------|----------------|
| 1    | 18.720               | 0.206          |
| 2    | 23.433               | 99.794         |

|       |  |         |
|-------|--|---------|
| 合計    |  | 100.000 |
| Total |  |         |

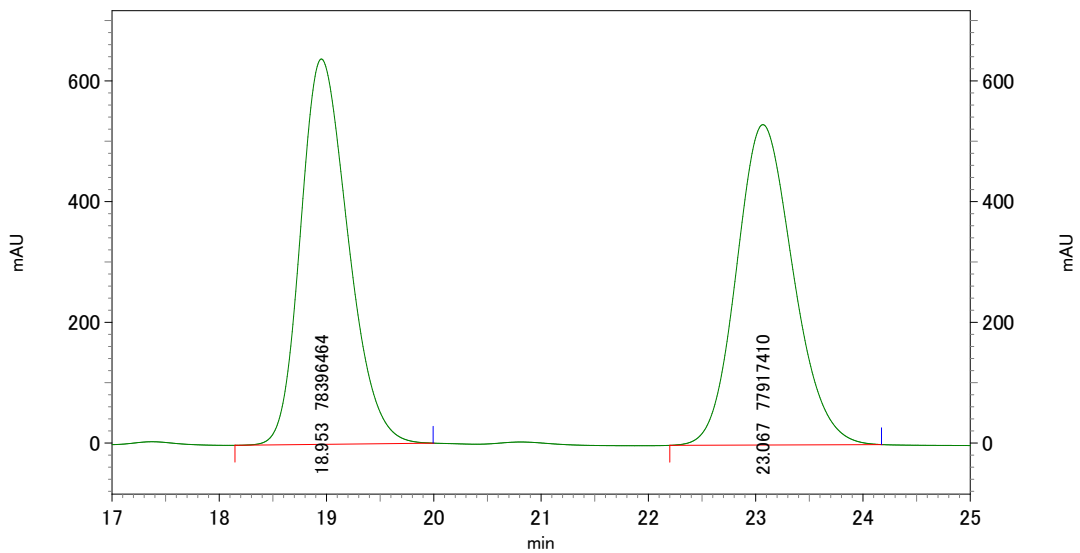

Result  
2: 210.0 nm, 4.0 nm 結果

| Pk # | Retention time / min | Integration/ % |
|------|----------------------|----------------|
| 1    | 18.953               | 50.153         |
| 2    | 23.067               | 49.847         |

|       |  |         |
|-------|--|---------|
| 合計    |  | 100.000 |
| Total |  |         |



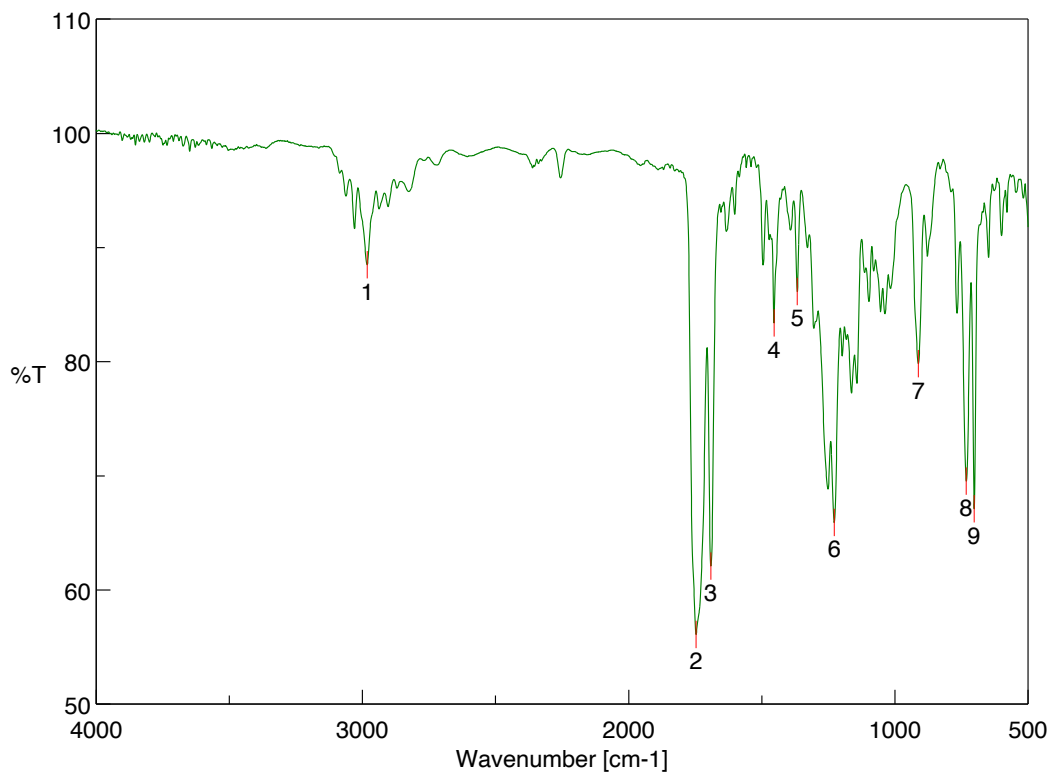

[ ピーク検出結果 ]

| No. | 位置      | 強度      | No. | 位置      | 強度      |
|-----|---------|---------|-----|---------|---------|
| 1   | 2982.37 | 88.4697 | 2   | 1747.19 | 56.0956 |
| 3   | 1691.27 | 62.0784 | 4   | 1454.06 | 83.3873 |
| 5   | 1367.28 | 86.1377 | 6   | 1227.47 | 65.9015 |
| 7   | 912.165 | 79.8155 | 8   | 731.853 | 69.5228 |
| 9   | 701.962 | 67.0953 |     |         |         |

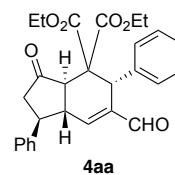

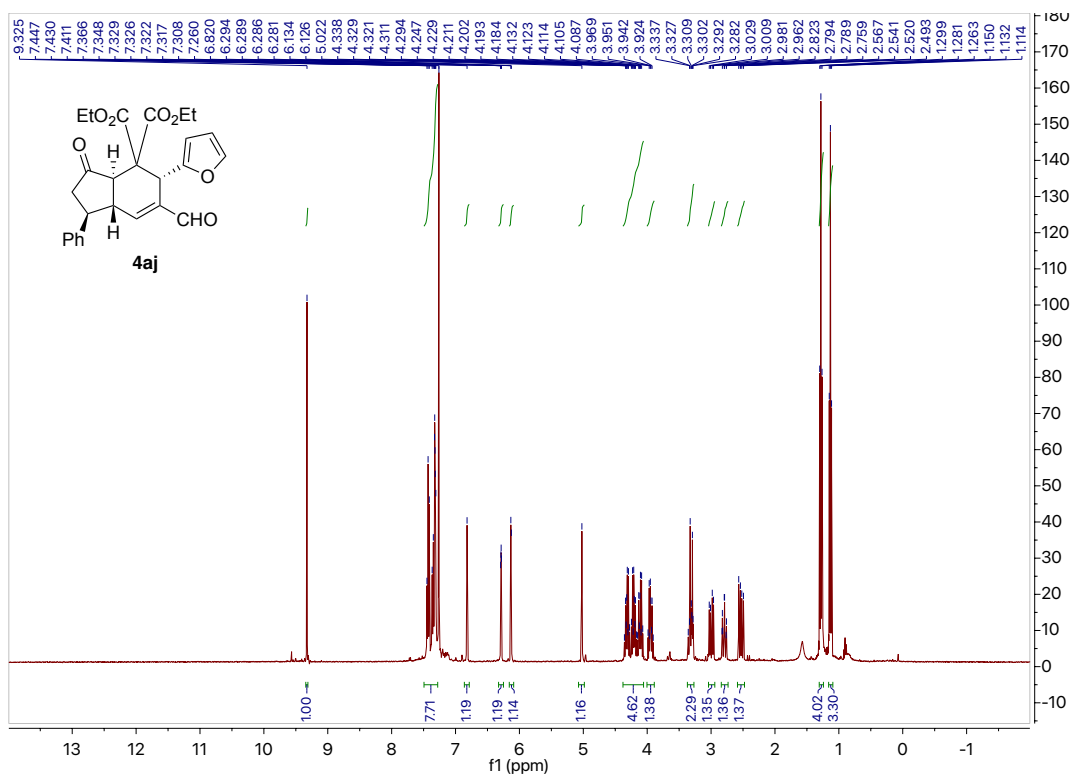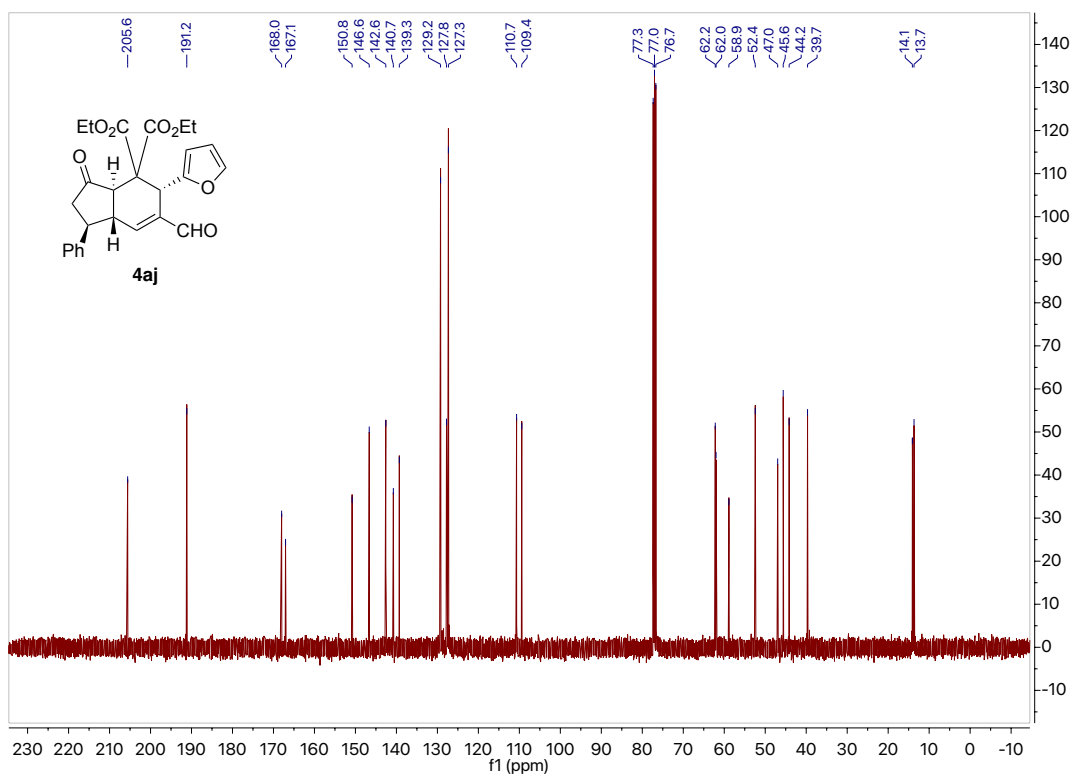

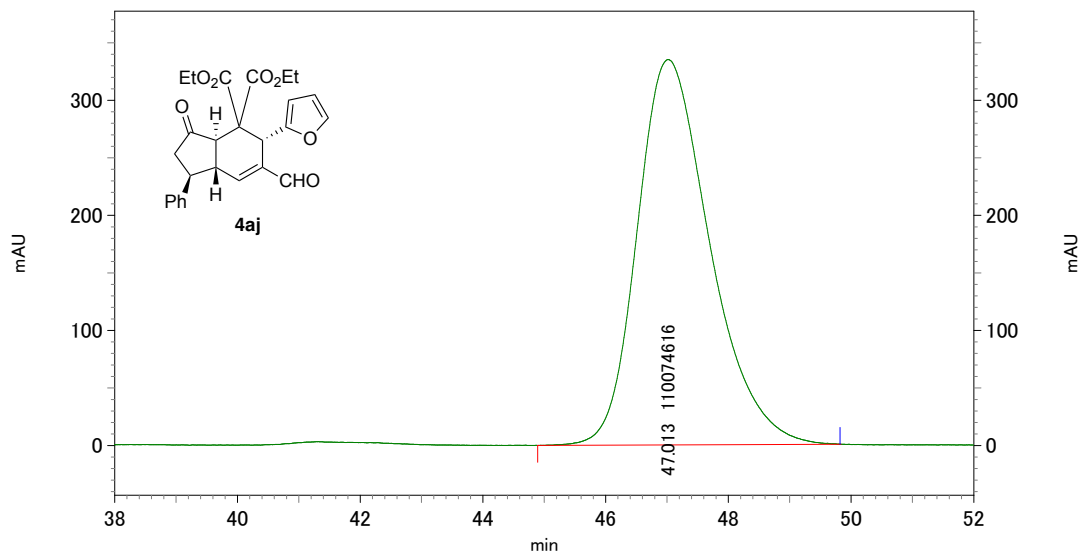

Result  
2: 208 nm, 4 nm結果

| Pk # | Retention time / min | Integration/ % |
|------|----------------------|----------------|
| 1    | 47.013               | 100.000        |

|       |  |         |
|-------|--|---------|
| トータル  |  | 100.000 |
| Total |  |         |

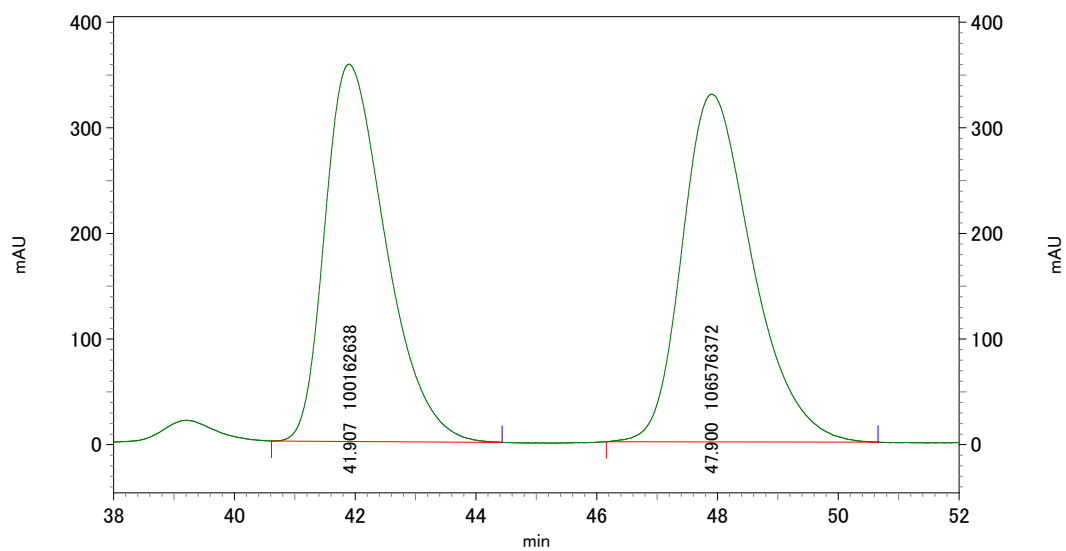

Result  
2: 208 nm, 4 nm結果

| Pk # | Retention time / min | Integration/ % |
|------|----------------------|----------------|
| 1    | 41.907               | 48.449         |
| 2    | 47.900               | 51.551         |

|       |  |         |
|-------|--|---------|
| トータル  |  | 100.000 |
| Total |  |         |

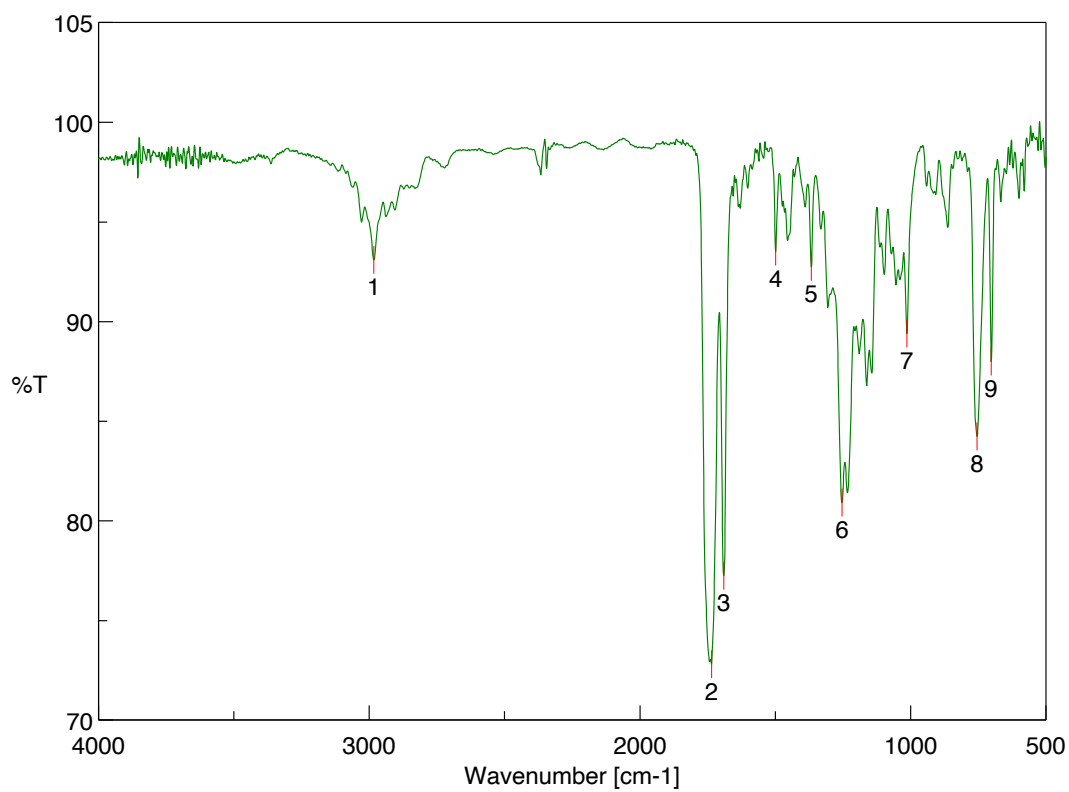

[ ピーク検出結果 ]

| No. | 位置      | 強度      | No. | 位置      | 強度      |
|-----|---------|---------|-----|---------|---------|
| 1   | 2983.34 | 93.0797 | 2   | 1735.62 | 72.7979 |
| 3   | 1690.3  | 77.2346 | 4   | 1498.42 | 93.5111 |
| 5   | 1367.28 | 92.7335 | 6   | 1253.5  | 80.9119 |
| 7   | 1013.41 | 89.3806 | 8   | 754.995 | 84.2305 |
| 9   | 701.962 | 87.9843 |     |         |         |

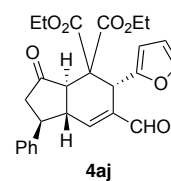

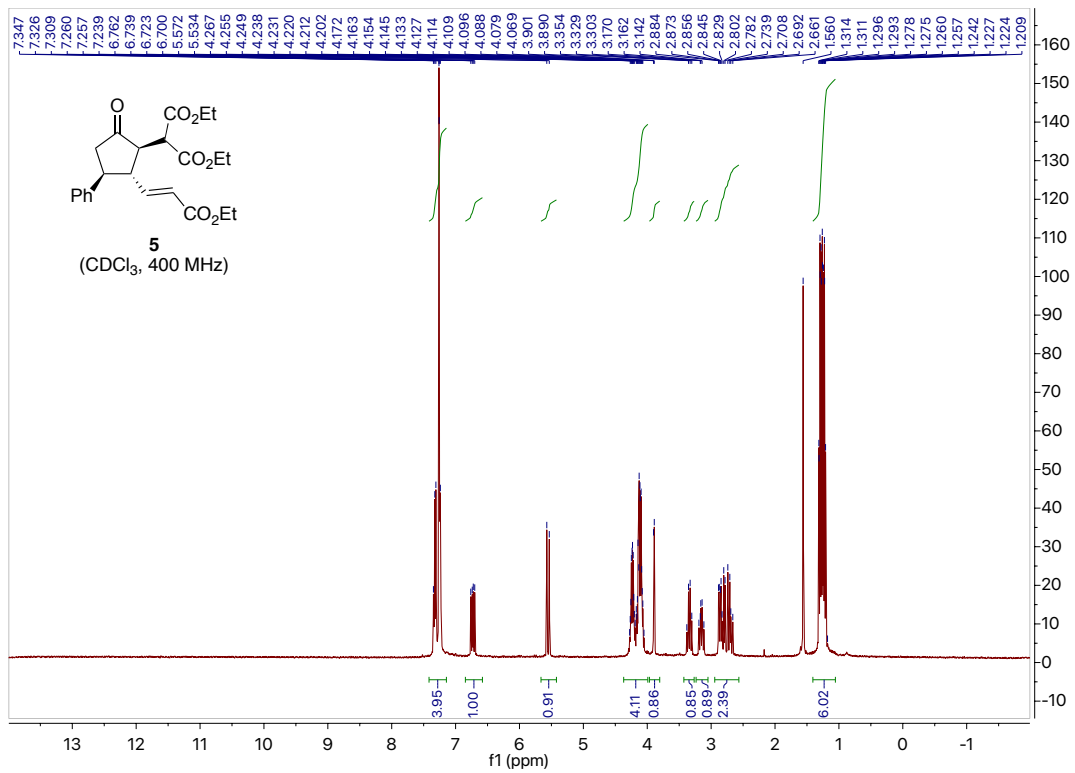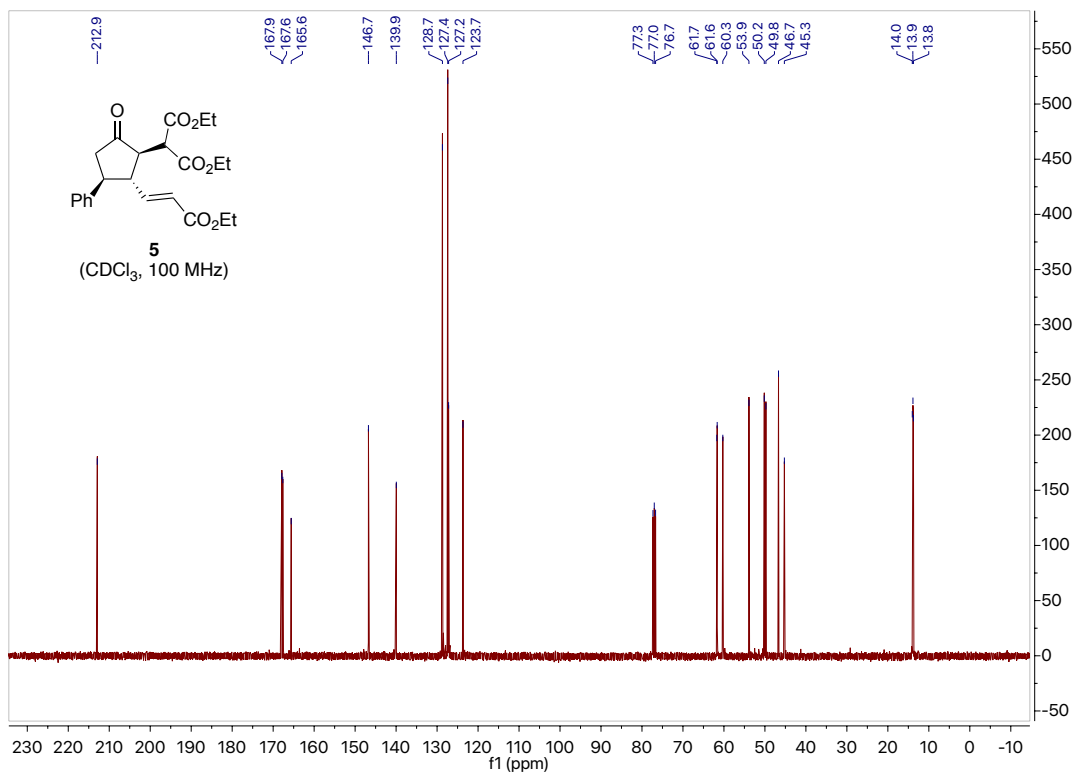

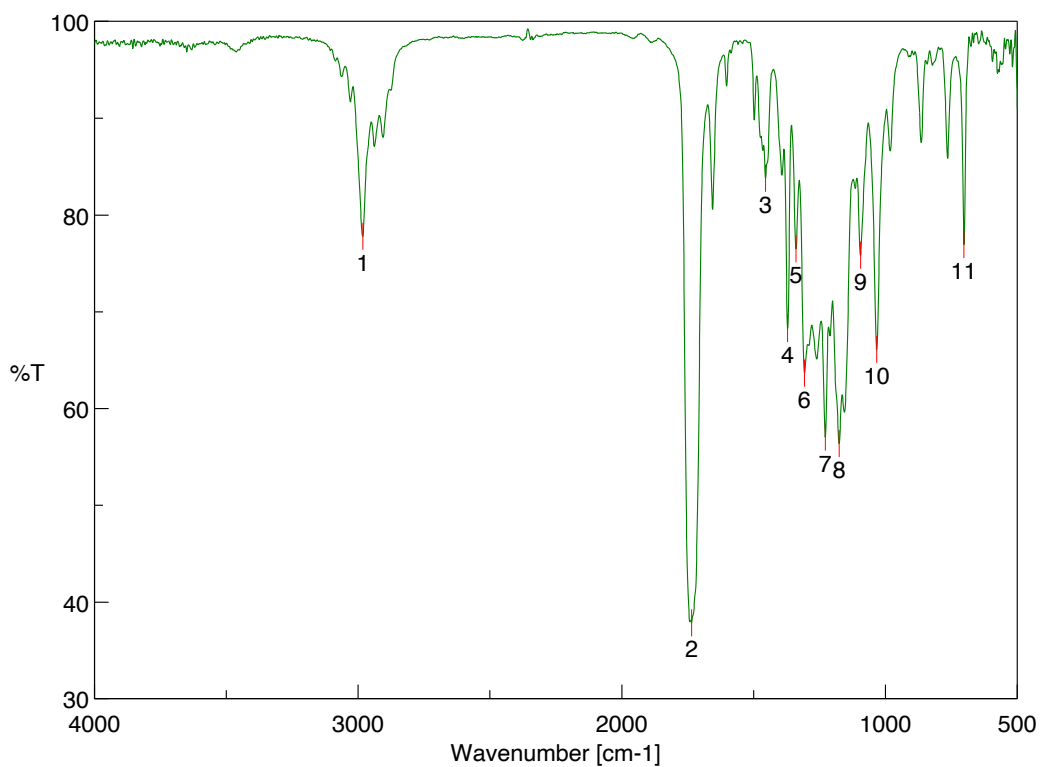

[ ピーク検出結果 ]

| No. | 位置      | 強度      | No. | 位置      | 強度      |
|-----|---------|---------|-----|---------|---------|
| 1   | 2982.37 | 77.7857 | 2   | 1735.62 | 37.8413 |
| 3   | 1455.03 | 83.7879 | 4   | 1371.14 | 68.2394 |
| 5   | 1339.32 | 76.5011 | 6   | 1306.54 | 63.6379 |
| 7   | 1227.47 | 57.0413 | 8   | 1175.4  | 56.369  |
| 9   | 1094.4  | 75.8134 | 10  | 1032.69 | 66.092  |
| 11  | 701.962 | 76.933  |     |         |         |

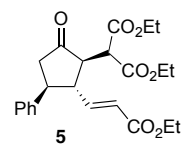

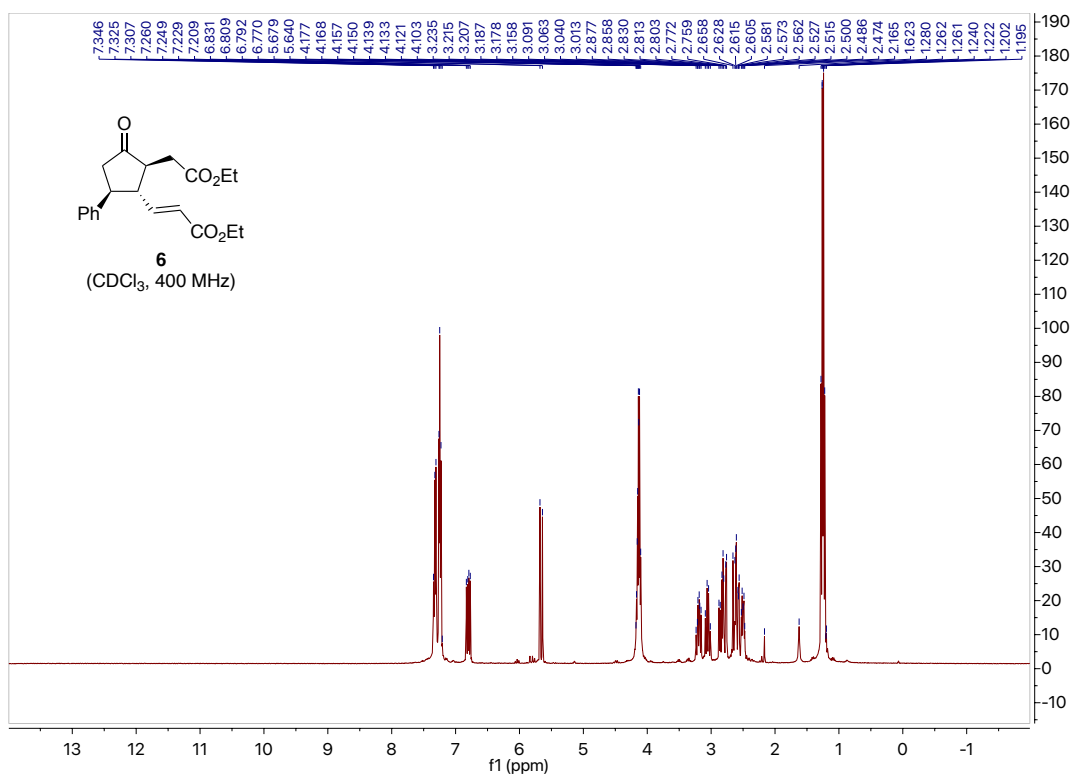

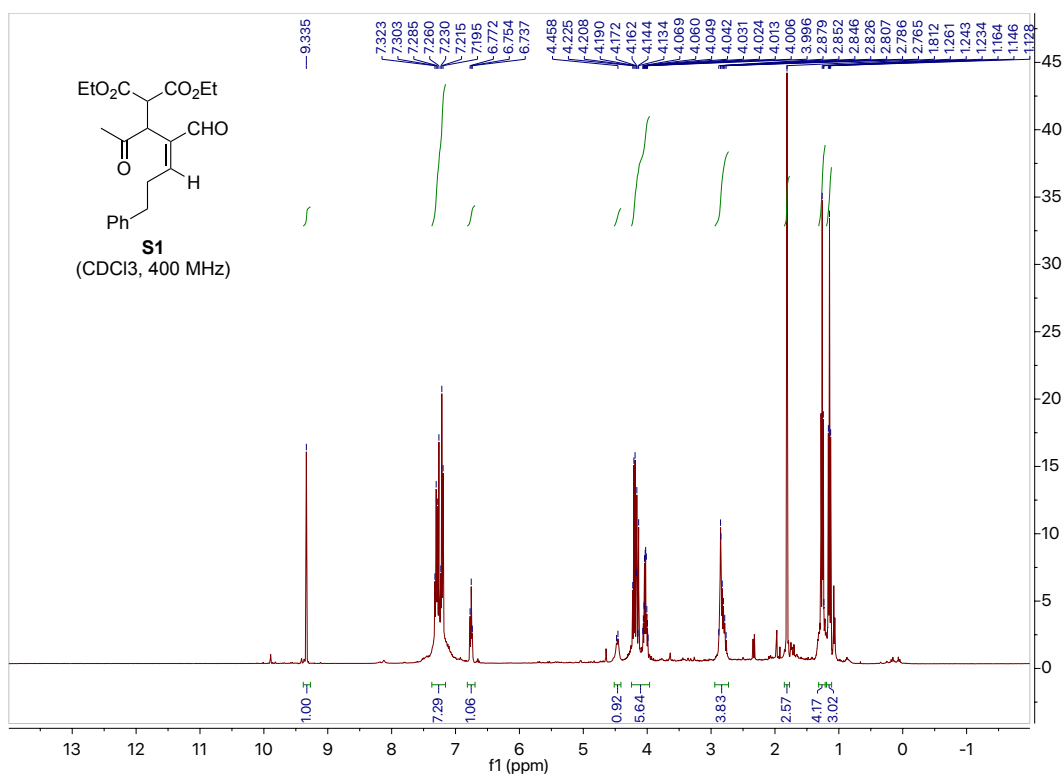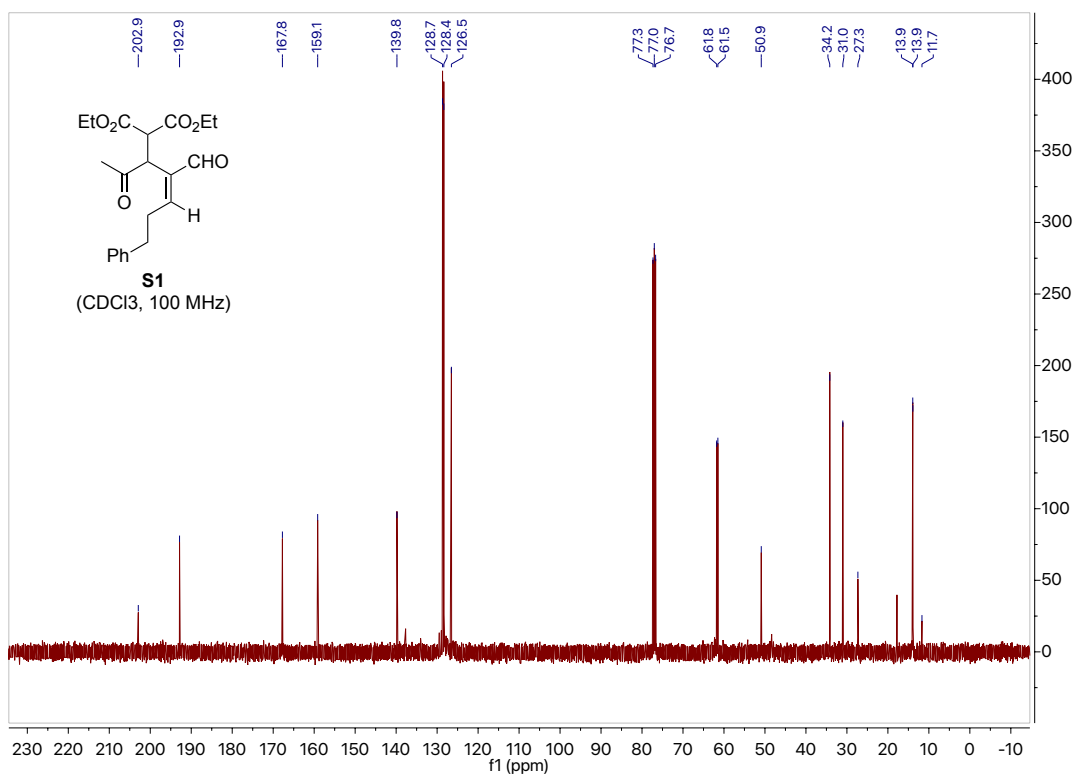



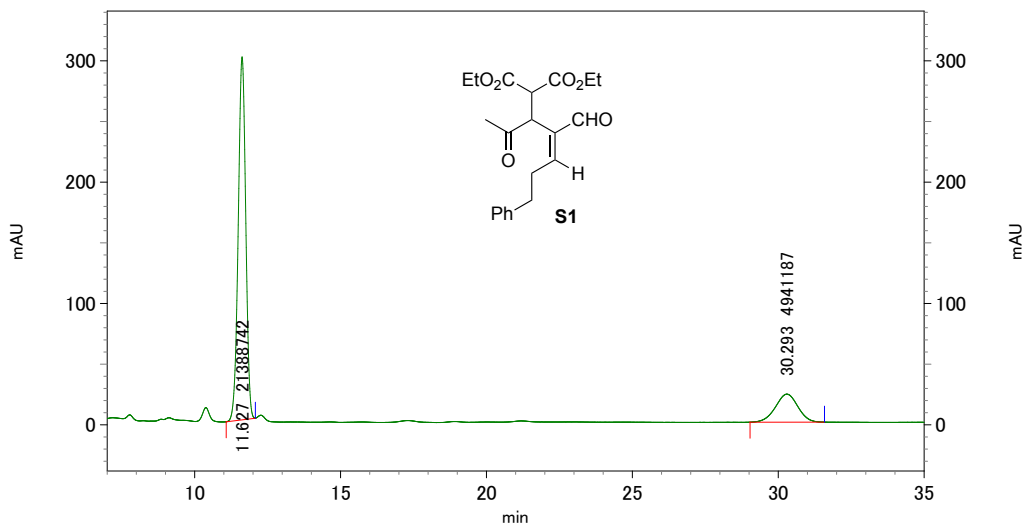

Result  
1: 210.0 nm, 4.0 nm 結果

| Pk # | Retention time / min | Integration / % |
|------|----------------------|-----------------|
| 1    | 11.627               | 81.234          |
| 2    | 30.293               | 18.766          |

|       |         |
|-------|---------|
| 合計    | 100.000 |
| Total |         |

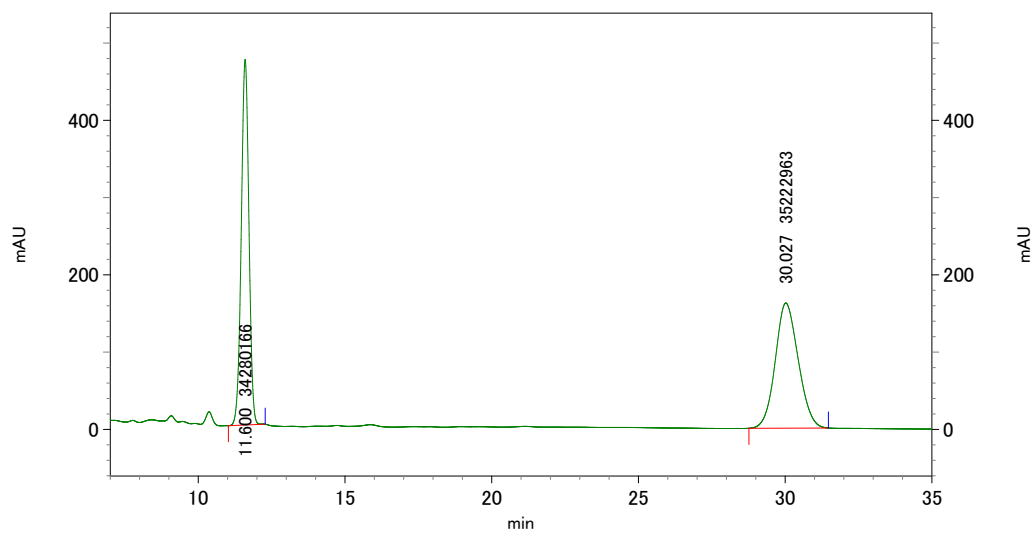

Result  
1: 210.0 nm, 4.0 nm 結果

| Pk # | Retention time / min | Integration / % |
|------|----------------------|-----------------|
| 1    | 11.600               | 49.322          |
| 2    | 30.027               | 50.678          |

|       |         |
|-------|---------|
| 合計    | 100.000 |
| Total |         |

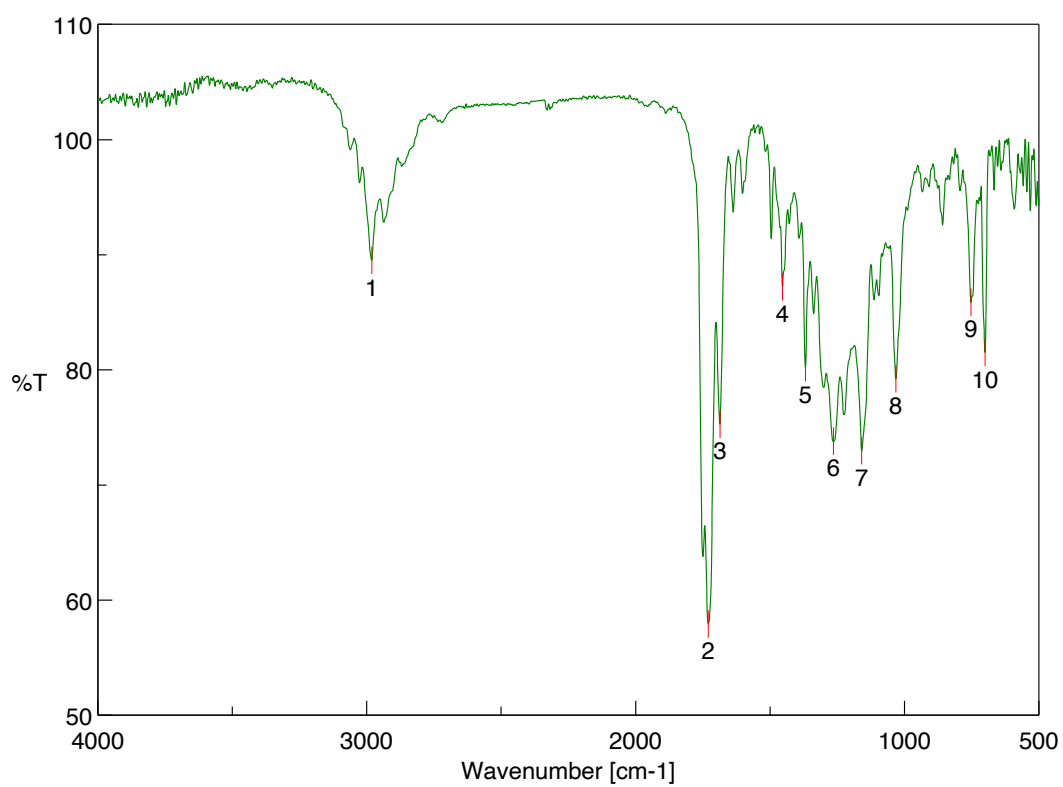

[ ピーク検出結果 ]

| No. | 位置      | 強度      | No. | 位置      | 強度      |
|-----|---------|---------|-----|---------|---------|
| 1   | 2981.41 | 89.5103 | 2   | 1729.83 | 57.9122 |
| 3   | 1686.44 | 75.2587 | 4   | 1454.06 | 87.21   |
| 5   | 1368.25 | 80.1891 | 6   | 1264.11 | 73.7849 |
| 7   | 1159.01 | 72.9677 | 8   | 1031.73 | 79.2077 |
| 9   | 753.066 | 85.8468 | 10  | 700.034 | 81.5084 |

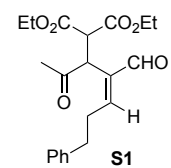

Supplement: d4sc00193a1.pdf [file d4sc00193a1.pdf]
